# Supplementary material
Source: PubMed Central journal article supplement (PMC3535893)
Supplement: AAC.00920-12_zac999101519so2.pdf [file AAC.00920-12_zac999101519so2.pdf]

## SUPPLEMENTAL INFORMATION FILES

# A Class of Tricyclic Compounds Blocking Malaria Oocyst Development and Transmission

**Richard T. Eastman,<sup>1,a</sup> Sittiporn Pattaradilokrat,<sup>1,a</sup> Dipak K. Raj,<sup>1,b</sup> Saurabh Dixit,<sup>2</sup> Bingbing Deng,<sup>1</sup> Kazutoyo Miura,<sup>1</sup> Jing Yuan,<sup>1</sup> Takeshi Q. Tanaka,<sup>1</sup> Ronald L. Johnson,<sup>3,c</sup> Hongying Jiang,<sup>1</sup> Ruili Huang,<sup>3</sup> Kim Williamson,<sup>1</sup> Lynn E. Lambert,<sup>2</sup> Carole Long,<sup>1</sup> Christopher P. Austin,<sup>3</sup> Yimin Wu,<sup>2</sup> and Xin-zhuan Su<sup>1,\*</sup>**

<sup>1</sup> Laboratory of Malaria and Vector Research, National Institute of Allergy and Infectious Diseases, National Institutes of Health, Bethesda, Maryland 20892-8132, USA; <sup>2</sup> Laboratory of Malaria Immunology and Vaccinology, National Institute of Allergy and Infectious Diseases, National Institutes of Health, Bethesda, Maryland 20892-8132, USA; and <sup>3</sup> NIH Chemical Genomics Center, National Human Genome Research Institute, National Institutes of Health, Bethesda, Maryland 20892-8132, USA

Running title: Discovery of drugs for blocking malaria transmission.

<sup>a</sup> These authors contributed equally.

<sup>b</sup> Present address: Center for International Health Research, Rhode Island Hospital, Providence, Rhode Island 02903, USA;

<sup>c</sup> Present address: Division of Cancer Biology, National Cancer Institute, National Institutes of Health, Bethesda, Maryland 20892-8132, USA.

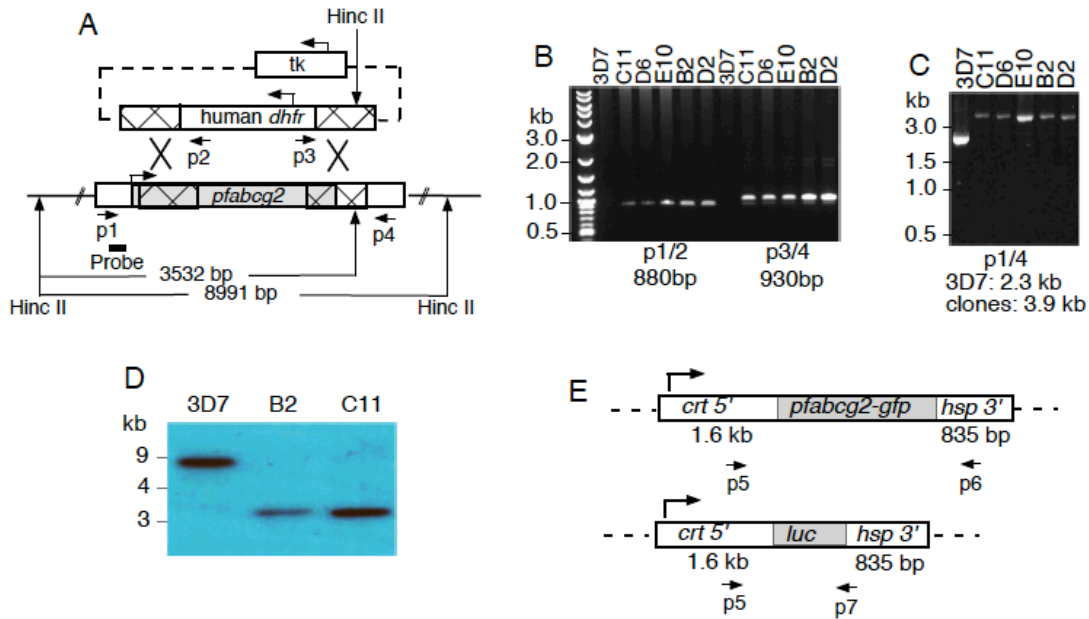

**Fig. S1** Disruption of the gene encoding *Plasmodium falciparum* ABC transporter G2 (*pfabcg2*).

**(A)** diagram showing the pHTK plasmid contract containing the genes encoding human dihydrofolate reductase (*dhfr*) and herpes simplex virus thymidine kinase (*tk*) and the two DNA segments (hatched bars) flanking the *pfabcg2* genes. Positions of PCR primers (arrows) and a DNA probes used in Southern blot are also shown; **(B)** and **(C)** agarose gels showing PCR products amplified from 3D7 and five clones with *pfabcg2* disrupted. Primer pairs used to produce the products are shown under the gel images; **(D)** Southern blot showing a ~9-kb band from 3D7 and ~3.5-kb band from the two *pfabcg2* disrupted clones, as predicted from known restriction sites shown in (A); **(E)** Two constructs containing the genes encoding either PfABCG2 or Luciferase. *Crt 5'* is *P. falciparum* chloroquine-resistance transporter (*crt*) 5' untranslated region, and *hsp 3'* is the 3' untranslated region of the gene encoding *P. falciparum* heat shock protein 90.

**Table S1** Primers used in plasmid construction and verification of construct integration into the homologous locus in the parasite genome.

| Primer name                                                                | Primer sequence*                               |
|----------------------------------------------------------------------------|------------------------------------------------|
| <b><i>Primers used to generate pfabcg2 null construct</i></b>              |                                                |
| Pf14_0244DI Fwd                                                            | <u>ggactag</u> tggttcatatatgcacac              |
| Pf14_0244DI Rev                                                            | ga <u>agatc</u> tggaacttttatccagcttacc         |
| Pf14_0244DII Fwd                                                           | <u>ccatcg</u> atacacttgactacttggtg             |
| Pf14_0244DII Rev                                                           | cat <u>gccat</u> gggtcatgtgcctaccta            |
| <b><i>Primers used to verify integration of pfabcg2 null construct</i></b> |                                                |
| P1 (Pf14_0244 5' UTR)                                                      | ggtttattatatatgaggctc                          |
| P2 ( <i>hrp</i> 2 3'UTR Fwd)                                               | cataaagtacaacattaatatagc                       |
| P3 (Cam promoter Rev)                                                      | ttaacaaagaagaagctcagag                         |
| P4 (Pf14_0244 3' UTR)                                                      | caatgtaaaatggtaataatagc                        |
| Pf14_0244 promoter Fwd 2                                                   | ccccactgtataacccttatgggga                      |
| Pf14_0244 Promoter Rev                                                     | tacc <u>ctagg</u> tatggtgtaggtaggcacatgaaatacc |
| <b><i>Primers used to generate and verify rescue constructs</i></b>        |                                                |
| Pf14_0244 Fwd                                                              | tacc <u>ctagg</u> tatggttgaagggtggattcc        |
| Pf14_0244 Rev                                                              | tac <u>ggatc</u> ctttcatttttaaggcttgggacc      |
| Pf14_0244 Promoter Fwd                                                     | tac <u>gggccc</u> acttaaaataaaaagtacatacaggtg  |
| Pf14_0244 Promoter Rev                                                     | tacc <u>ctagg</u> tatggtgtaggtaggcacatgaaatacc |
| P5 (1600crt promoter Fwd)                                                  | cgtaataataaatacacgcagtc                        |
| P6 ( <i>hsp</i> 86 3' UTR Rev)                                             | tgtagacccattgtgagtac                           |
| P7 (luciferase 3' Rev)                                                     | gagtttctactgcatacgacg                          |

\* Restriction sites are denoted with an underline

**Table S2.** Responses of three *Plasmodium falciparum* parasites (3D7, B2, and C11) to 2,816 drugs approved for human and animal use.

| Sample ID       | Name                            | B2 DCP | C11 DCP | Delta               | Delta IC <sub>50</sub> | IC <sub>50</sub> |                     | IC <sub>50</sub> |     | Activity | Activity | Activity | Efficacy | Efficacy | Efficacy |
|-----------------|---------------------------------|--------|---------|---------------------|------------------------|------------------|---------------------|------------------|-----|----------|----------|----------|----------|----------|----------|
|                 |                                 |        |         | IC <sub>50</sub> B2 | C11                    | 3D7              | IC <sub>50</sub> B2 | C11              | 3D7 | B2       | C11      | 3D7      | B2       | C11      |          |
| NCGC00167562-01 | BUQUINOLATE                     | Sens   | Sens    | 0.55                | 0.80                   | -6.3             | -6.9                | -7.1             | A   | A        | A        | -92      | -92      | -98      |          |
| NCGC00163221-01 | AMBENONIUM                      | Sens   | Sens    | 0.85                | 0.75                   | -5.5             | -6.3                | -6.2             | A   | A        | A        | -70      | -59      | -71      |          |
| NCGC00161419-02 | TRIMETREXATE GLUCURONATE        | Resist | Resist  | -3.45               | -3.45                  | -8.4             | -4.9                | -4.9             | A   | A        | A        | -98      | -134     | -115     |          |
| NCGC00016256-08 | Pyrimethamine                   | Resist | Resist  | -2.83               |                        | -7.4             | -4.5                |                  | A   | N        | N        | -97      |          | -10      |          |
| NCGC00025060-04 | methotrexate                    | Resist | Resist  | -2.25               | -2.20                  | -7.2             | -4.9                | -5.0             | A   | I        | I        | -95      | -58      | -56      |          |
| NCGC00160517-01 | DIAVERIDINUM                    | Resist | Resist  | -0.78               | -0.78                  | -5.3             | -4.5                | -4.5             | A   | N        | N        | -92      |          |          |          |
| NCGC00167968-01 | VALNEMULIN HYDROCHLORIDE        | Resist | Resist  | -0.55               | -0.60                  | -5.7             | -5.1                | -5.1             | A   | I        | I        | -77      | -49      | -48      |          |
| NCGC00167486-01 | PEMETREXED                      | Resist | Resist  | -0.55               | -0.55                  | -5.5             | -4.9                | -4.9             | A   | A        | A        | -93      | -79      | -80      |          |
| NCGC00015580-08 | KETOTIFEN                       | Resist | Resist  |                     |                        | -5.2             |                     |                  | A   | N        | N        | -91      | -14      | -16      |          |
| NCGC00167523-01 | ORMETOPRIM                      | Resist | Resist  |                     | -0.68                  | -5.2             |                     | -4.5             | A   | N        | N        | -82      |          | 5        |          |
| NCGC00016055-05 | Trimethoprim                    | Resist | Resist  |                     | -0.93                  | -5.5             |                     | -4.5             | A   | N        | N        | -100     |          | 11       |          |
| NCGC00016016-10 | Triamterene                     | Resist | Resist  |                     |                        | -5.8             |                     |                  | A   | N        | N        | -63      | -4       | -1       |          |
| NCGC00168751-01 | BORTEZOMIB                      | Sens   |         | 0.65                | 0.40                   | -5.6             | -6.2                | -6.0             | A   | A        | A        | -101     | -102     | -103     |          |
| NCGC00181022-01 | BORTEZOMIB                      | Sens   |         | 0.70                | 0.45                   | -5.7             | -6.4                | -6.1             | A   | A        | A        | -101     | -99      | -99      |          |
| NCGC00181051-01 | STRYCHNINE SULFATE              | Sens   |         | 0.50                | 0.40                   | -5.3             | -5.8                | -5.7             | I   | A        | A        | -55      | -46      | -59      |          |
| NCGC00016611-01 | Bufexamac                       |        | Sens    | 0.25                | 0.55                   | -6.0             | -6.3                | -6.6             | A   | A        | A        | -94      | -97      | -94      |          |
| NCGC00167982-01 | PIRARUBICIN                     |        | Sens    | 0.30                | 0.55                   | -4.9             | -5.2                | -5.5             | A   | A        | A        | -126     | -103     | -93      |          |
| NCGC00167438-01 | TROSPIMUM CHLORIDE              |        | Sens    | 0.35                | 0.75                   | -5.3             | -5.7                | -6.1             | A   | A        | A        | -95      | -72      | -62      |          |
| NCGC00016951-01 | Clebopride maleate              |        | Sens    | 0.00                | 0.65                   | -4.5             | -4.5                | -5.2             | N   | N        | I        |          |          | -41      |          |
| NCGC00160523-01 | LANATOSIDE A                    |        | Sens    |                     | 0.73                   | -4.5             |                     | -5.3             | N   | N        | I        |          | -25      | -31      |          |
| NCGC00095264-01 | CHLOROXYNE                      |        |         | -0.45               | -0.25                  | -5.2             | -4.7                | -4.9             | A   | I        | A        | -104     | -119     | -119     |          |
| NCGC00163470-03 | TACROLIMUS                      |        |         | -0.40               | -0.05                  | -5.8             | -5.4                | -5.7             | A   | A        | A        | -98      | -96      | -91      |          |
| NCGC00093644-01 | Amsacrine hydrochloride         |        |         | -0.35               | 0.00                   | -5.8             | -5.4                | -5.8             | A   | A        | A        | -96      | -98      | -101     |          |
| NCGC00167969-01 | RUBITECAN                       |        |         | -0.25               | 0.05                   | -5.3             | -5.0                | -5.3             | A   | A        | A        | -76      | -83      | -80      |          |
| NCGC00168786-01 | DESERPIDINE                     |        |         | -0.25               | -0.20                  | -6.5             | -6.3                | -6.3             | A   | A        | A        | -101     | -98      | -96      |          |
| NCGC00094422-01 | SB 206553 hydrochloride         |        |         | -0.20               | 0.10                   | -4.9             | -4.7                | -5.0             | A   | I        | A        | -90      | -92      | -81      |          |
| NCGC00160464-01 | Rolicyclidine                   |        |         | -0.20               | -0.05                  | -4.9             | -4.7                | -4.9             | A   | I        | A        | -101     | -105     | -114     |          |
| NCGC00015424-04 | FLUSPIRILENE                    |        |         | -0.20               | -0.05                  | -5.4             | -5.2                | -5.3             | A   | A        | A        | -105     | -102     | -97      |          |
| NCGC00094813-01 | ACRIFLAVINIUM HYDROCHLORIDE     |        |         | -0.20               |                        | -6.7             | -6.5                |                  | A   | A        | N        | -95      | -97      | -96      |          |
| NCGC00181122-01 | LAURYL ISOQUINOLINIUM BROMIDE   |        |         | -0.20               |                        | -6.0             | -5.8                |                  | A   | A        | N        | -98      | -105     | -98      |          |
| NCGC00015693-02 | Mitoxantrone dihydrochloride    |        |         | -0.20               | 0.05                   | -5.4             | -5.2                | -5.4             | A   | A        | A        | -107     | -118     | -106     |          |
| NCGC00024643-03 | IFENPRODIL                      |        |         | -0.20               | 0.05                   | -5.3             | -5.1                | -5.3             | A   | A        | A        | -67      | -74      | -81      |          |
| NCGC00022001-05 | Podofilox                       |        |         | -0.20               | 0.00                   | -5.0             | -4.8                | -5.0             | A   | A        | A        | -113     | -143     | -114     |          |
| NCGC00091250-04 | Reserpine                       |        |         | -0.20               | -0.20                  | -5.0             | -4.8                | -4.8             | A   | A        | A        | -111     | -125     | -133     |          |
| NCGC00025349-02 | R(-)-APOMORPHINE                |        |         | -0.15               | 0.00                   | -4.9             | -4.8                | -4.9             | A   | I        | A        | -116     | -127     | -111     |          |
| NCGC00166120-01 | Mecetronium ethylsulfate        |        |         | -0.15               | 0.05                   | -5.3             | -5.2                | -5.4             | A   | A        | A        | -95      | -118     | -108     |          |
| NCGC00095189-01 | TOPOTECAN HYDROCHLORIDE         |        |         | -0.15               | -0.05                  | -5.4             | -5.2                | -5.3             | A   | A        | A        | -71      | -77      | -85      |          |
| NCGC00094476-03 | R(+)-TERGURIDE                  |        |         | -0.15               | 0.15                   | -5.6             | -5.5                | -5.8             | A   | I        | A        | -42      | -50      | -57      |          |
| NCGC00160650-01 | ACRINOL                         |        |         | -0.15               | 0.30                   | -5.6             | -5.5                | -5.9             | A   | A        | A        | -102     | -108     | -94      |          |
| NCGC0016961-01  | Atovaquone                      |        |         | -0.15               | -0.05                  | -8.9             | -8.8                | -8.9             | A   | A        | A        | -95      | -97      | -95      |          |
| NCGC00095070-01 | HOMIDIUM BROMIDE                |        |         | -0.15               | -0.15                  | -6.9             | -6.7                | -6.7             | A   | A        | A        | -104     | -99      | -103     |          |
| NCGC00017042-01 | Pyrvinium pamoate               |        |         | -0.15               | -0.35                  | -6.2             | -6.1                | -5.9             | A   | A        | A        | -106     | -99      | -99      |          |
| NCGC00094574-06 | FIPRONIL                        |        |         | -0.15               | -0.10                  | -5.5             | -5.3                | -5.4             | A   | A        | A        | -95      | -97      | -94      |          |
| NCGC00168085-01 | SUBEROYLANILIDE HYDROXAMIC ACID |        |         | -0.15               | -0.05                  | -6.3             | -6.1                | -6.2             | A   | A        | A        | -104     | -101     | -110     |          |
| NCGC00016913-08 | ASTEMIZOLE                      |        |         | -0.15               | -0.15                  | -6.0             | -5.8                | -5.8             | A   | A        | A        | -102     | -101     | -103     |          |
| NCGC00181330-01 | NITROVIN                        |        |         | -0.10               | 0.15                   | -5.1             | -5.0                | -5.2             | A   | A        | A        | -109     | -115     | -97      |          |
| NCGC00016770-01 | Miconazole                      |        |         | -0.10               | 0.10                   | -5.2             | -5.1                | -5.3             | A   | A        | A        | -111     | -125     | -116     |          |
| NCGC00159344-02 | CARUBICINUM                     |        |         | -0.10               | 0.10                   | -5.1             | -5.0                | -5.2             | A   | A        | A        | -111     | -117     | -97      |          |
| NCGC00018268-03 | itraconazole                    |        |         | -0.10               | 0.05                   | -5.3             | -5.2                | -5.4             | A   | A        | A        | -96      | -104     | -101     |          |
| NCGC00181017-01 | PIMOBENDAN                      |        |         | -0.10               | -0.15                  | -4.9             | -4.8                | -4.7             | A   | A        | A        | -82      | -79      | -93      |          |
| NCGC00095170-01 | OXICONAZOLE NITRATE             |        |         | -0.10               | -0.05                  | -5.4             | -5.3                | -5.3             | A   | A        | A        | -99      | -103     | -104     |          |
| NCGC00181140-01 | CARBOQUONE                      |        |         | -0.10               | 0.05                   | -6.1             | -6.0                | -6.1             | A   | A        | A        | -102     | -101     | -100     |          |
| NCGC00167550-01 | NARASIN                         |        |         | -0.10               | 0.00                   | -7.3             | -7.2                | -7.3             | A   | A        | A        | -99      | -90      | -89      |          |
| NCGC00016602-01 | Benperidol                      |        |         | -0.10               | 0.20                   | -5.4             | -5.3                | -5.6             | A   | A        | A        | -110     | -108     | -103     |          |
| NCGC00017148-01 | Verteporfin                     |        |         | -0.10               | 0.15                   | -5.2             | -5.1                | -5.3             | A   | A        | A        | -100     | -107     | -98      |          |
| NCGC00164514-01 | AMBAZONUM                       |        |         | -0.10               | 0.15                   | -5.2             | -5.1                | -5.3             | A   | A        | A        | -120     | -78      | -66      |          |
| NCGC00018258-03 | Econazole nitrate               |        |         | -0.10               | 0.05                   | -5.3             | -5.2                | -5.3             | A   | A        | A        | -101     | -102     | -98      |          |
| NCGC00166405-01 | BENZALKONIUM CHLORIDE           |        |         | -0.10               | 0.05                   | -5.3             | -5.2                | -5.3             | A   | A        | A        | -97      | -129     | -102     |          |
| NCGC00160648-01 | Salinazid                       |        |         | -0.10               | 0.00                   | -4.9             | -4.8                | -4.9             | A   | A        | A        | -85      | -109     | -96      |          |

|                 |                                          |       |       |      |      |      |   |   |   |      |      |      |
|-----------------|------------------------------------------|-------|-------|------|------|------|---|---|---|------|------|------|
| NCGC00181023-01 | NOLATREXED                               | -0.10 | -0.10 | -5.0 | -4.9 | -4.9 | A | A | A | -89  | -94  | -115 |
| NCGC00095162-01 | TYLOSIN TARTRATE                         | -0.10 | 0.15  | -5.7 | -5.6 | -5.9 | A | I | A | -36  | -49  | -52  |
| NCGC00159326-02 | Lincomycin hydrochloride                 | -0.10 | -0.05 | -6.0 | -5.9 | -6.0 | A | A | A | -38  | -44  | -59  |
| NCGC00016336-01 | Syrosingopine                            | -0.10 | 0.00  | -5.8 | -5.7 | -5.8 | A | A | A | -96  | -100 | -97  |
| NCGC00167516-01 | DESLORELIN ACETATE                       | -0.10 | 0.00  | -5.4 | -5.3 | -5.4 | A | A | A | -98  | -102 | -99  |
| NCGC00167493-01 | MANIDIPINE HYDROCHLORIDE                 | -0.10 | -0.05 | -5.4 | -5.3 | -5.4 | A | A | A | -100 | -94  | -89  |
| NCGC00094777-01 | RIFAMPIN                                 | -0.10 | 0.05  | -5.7 | -5.6 | -5.8 | A | A | A | -97  | -106 | -96  |
| NCGC00091563-01 | Tetramethylthiuram disulfide             | -0.10 | 0.00  | -5.7 | -5.6 | -5.7 | A | A | A | -89  | -97  | -94  |
| NCGC00021305-05 | SIROLIMUS                                | -0.10 | -0.05 | -5.5 | -5.4 | -5.4 | A | A | A | -102 | -104 | -103 |
| NCGC00095098-01 | TENIPOSIDE                               | -0.10 | -0.05 | -6.0 | -5.9 | -5.9 | A | A | A | -96  | -93  | -86  |
| NCGC00167512-01 | EVEROLIMUS                               | -0.10 | -0.05 | -5.5 | -5.4 | -5.4 | A | A | A | -101 | -99  | -98  |
| NCGC00164493-01 | Dipyrrithione                            | -0.10 | -0.15 | -6.2 | -6.1 | -6.1 | A | A | A | -97  | -108 | -99  |
| NCGC00091585-03 | Octocrylene                              | -0.05 | -0.05 | -4.8 | -4.8 | -4.8 | A | I | I | -112 | -117 | -111 |
| NCGC00017112-01 | Ciclopirox ethanolamine                  | -0.05 | 0.10  | -5.2 | -5.1 | -5.3 | A | I | A | -119 | -113 | -111 |
| NCGC00091195-04 | Hexachlorophene                          | -0.05 | 0.00  | -4.8 | -4.8 | -4.8 | A | I | A | -120 | -115 | -113 |
| NCGC00016247-01 | Cantharidin                              | -0.05 | 0.10  | -5.4 | -5.4 | -5.5 | A | A | A | -89  | -92  | -96  |
| NCGC00161399-01 | LOE 908 hydrochloride                    | -0.05 | 0.05  | -5.3 | -5.3 | -5.4 | A | A | A | -99  | -102 | -101 |
| NCGC00166399-01 | Imidocarbe                               | -0.05 | -0.25 | -5.1 | -5.0 | -4.8 | A | A | A | -106 | -99  | -118 |
| NCGC00181026-01 | ROBENIDINE HYDROCHLORIDE                 | -0.05 | 0.00  | -5.6 | -5.5 | -5.6 | A | A | A | -98  | -96  | -97  |
| NCGC00094424-01 | Trequinsin hydrochloride                 | -0.05 | -0.05 | -5.8 | -5.8 | -5.8 | A | A | A | -102 | -95  | -100 |
| NCGC00159392-02 | CHLOROBUTANOL                            | -0.05 | 0.30  | -4.9 | -4.8 | -5.2 | A | A | A | -132 | -126 | -104 |
| NCGC00016486-01 | (d,l)-Tetrahydroberberine                | -0.05 | 0.20  | -5.6 | -5.5 | -5.8 | A | A | A | -82  | -76  | -79  |
| NCGC00017114-01 | Cefsulodin sodium salt                   | -0.05 | 0.20  | -5.3 | -5.3 | -5.5 | A | A | A | -113 | -113 | -105 |
| NCGC00095150-01 | TELMISARTAN                              | -0.05 | 0.10  | -5.3 | -5.2 | -5.4 | A | A | A | -87  | -75  | -76  |
| NCGC00167582-01 | CETALKONIUM CHLORIDE                     | -0.05 | 0.10  | -4.9 | -4.8 | -5.0 | A | A | A | -121 | -109 | -89  |
| NCGC00164615-01 | Prulifloxacin                            | -0.05 | 0.05  | -5.4 | -5.3 | -5.4 | A | A | A | -99  | -99  | -102 |
| NCGC00164603-01 | Ebastine                                 | -0.05 | 0.00  | -5.0 | -5.0 | -5.0 | A | A | A | -110 | -116 | -110 |
| NCGC00181142-02 | PARA-CHLOROMERCURIPHENOL                 | -0.05 | -0.05 | -5.2 | -5.2 | -5.2 | A | A | A | -89  | -86  | -95  |
| NCGC00167435-01 | NILVADIPINE                              | -0.05 | -0.10 | -4.9 | -4.9 | -4.8 | A | A | A | -98  | -105 | -110 |
| NCGC00167430-01 | TIOCONAZOLE                              | -0.05 | 0.00  | -5.4 | -5.3 | -5.4 | A | A | A | -98  | -99  | -103 |
| NCGC00016554-01 | Nifuroxazide                             | -0.05 |       | -5.6 | -5.6 |      | A | A | I | -90  | -92  | -90  |
| NCGC00095016-01 | CLOFOCTOL                                | -0.05 | 0.00  | -5.4 | -5.3 | -5.4 | A | A | A | -100 | -95  | -91  |
| NCGC00095258-01 | MITOMYCIN C                              | -0.05 | 0.20  | -6.2 | -6.2 | -6.4 | A | A | A | -98  | -97  | -92  |
| NCGC00163233-01 | IVERMECTIN                               | -0.05 | 0.15  | -5.5 | -5.5 | -5.7 | A | A | A | -98  | -96  | -96  |
| NCGC00167495-01 | METHYL VIOLET                            | -0.05 | 0.10  | -6.2 | -6.1 | -6.3 | A | A | A | -99  | -100 | -98  |
| NCGC00167963-01 | DIPHENOXYLATE HYDROCHLORIDE              | -0.05 | 0.05  | -5.5 | -5.4 | -5.5 | A | A | A | -99  | -103 | -101 |
| NCGC00015735-07 | Niclosamide                              | -0.05 | 0.00  | -6.0 | -6.0 | -6.0 | A | A | A | -99  | -98  | -101 |
| NCGC00091935-01 | Ergotamine D-tartrate                    | -0.05 | 0.00  | -6.0 | -5.9 | -6.0 | A | A | A | -99  | -98  | -98  |
| NCGC00095101-01 | TANNIC ACID                              | -0.05 | 0.00  | -5.5 | -5.5 | -5.5 | A | A | A | -104 | -106 | -102 |
| NCGC00164367-01 | Paclitaxel                               | -0.05 | 0.00  | -6.7 | -6.6 | -6.7 | A | A | A | -75  | -76  | -79  |
| NCGC00181043-01 | CLOBETASONE BUTYRATE                     | -0.05 | 0.00  | -5.5 | -5.4 | -5.5 | A | A | A | -96  | -99  | -99  |
| NCGC00181146-01 | SIROLIMUS                                | -0.05 | 0.00  | -5.4 | -5.4 | -5.4 | A | A | A | -101 | -93  | -97  |
| NCGC00091933-01 | Zinc pyrithione                          | -0.05 | -0.05 | -6.4 | -6.3 | -6.3 | A | A | A | -97  | -103 | -100 |
| NCGC00094893-01 | PUROMYCIN HYDROCHLORIDE                  | -0.05 | -0.05 | -6.3 | -6.2 | -6.2 | A | A | A | -100 | -102 | -98  |
| NCGC00091112-02 | Chlorure de methylosanilinum             | -0.05 |       | -6.2 | -6.2 |      | A | A | N | -101 | -98  | -101 |
| NCGC00160442-01 | Metochalcone                             | 0.00  | 0.40  | -4.8 | -4.8 | -5.2 | A | I | A | -120 | -103 | -96  |
| NCGC00091023-01 | Cetylpyridinium bromide                  | 0.00  | 0.25  | -5.2 | -5.2 | -5.4 | A | A | A | -98  | -100 | -79  |
| NCGC00095172-01 | SECURININE                               | 0.00  | 0.20  | -4.9 | -4.9 | -5.1 | A | A | A | -121 | -116 | -101 |
| NCGC00016786-01 | Mycophenolic acid                        | 0.00  | 0.10  | -5.6 | -5.6 | -5.7 | A | A | A | -95  | -97  | -93  |
| NCGC00159459-02 | MYCOPHENOLATE MOFETIL                    | 0.00  | 0.10  | -5.2 | -5.2 | -5.3 | A | A | A | -103 | -95  | -96  |
| NCGC00167436-01 | AZELNIDIPINE                             | 0.00  | 0.10  | -5.0 | -5.0 | -5.1 | A | A | A | -110 | -106 | -105 |
| NCGC00181158-01 | MERCUFENOL CHLORIDE                      | 0.00  | 0.10  | -5.4 | -5.4 | -5.5 | A | A | A | -104 | -99  | -103 |
| NCGC00017400-05 | DIHYDROERGOTAMINE                        | 0.00  | 0.05  | -5.1 | -5.1 | -5.2 | A | A | A | -102 | -100 | -104 |
| NCGC00091455-01 | Celecoxib                                | 0.00  | 0.00  | -4.8 | -4.8 | -4.8 | A | A | A | -88  | -87  | -93  |
| NCGC00164571-01 | Dutasteride                              | 0.00  | 0.00  | -5.3 | -5.3 | -5.3 | A | A | A | -87  | -85  | -92  |
| NCGC00168257-01 | DRONABINOL                               | 0.00  | 0.00  | -5.3 | -5.3 | -5.3 | A | A | A | -99  | -99  | -103 |
| NCGC00181154-01 | NITARSONE                                | 0.00  | 0.00  | -5.3 | -5.3 | -5.3 | A | A | A | -96  | -96  | -100 |
| NCGC00024964-02 | Fulvestrant                              | 0.00  | -0.05 | -4.9 | -4.9 | -4.8 | A | A | A | -116 | -113 | -121 |
| NCGC00092329-02 | Eliprodil                                | 0.00  | -0.05 | -5.3 | -5.3 | -5.3 | A | A | A | -79  | -87  | -88  |
| NCGC00159460-02 | INDINAVIR SULFATE                        | 0.00  | -0.10 | -4.9 | -4.9 | -4.8 | A | A | A | -92  | -75  | -98  |
| NCGC00164576-02 | LOPINAVIR                                | 0.00  | -0.05 | -5.4 | -5.4 | -5.3 | A | A | A | -103 | -106 | -103 |
| NCGC00181009-01 | TIMEPIDIUM BROMIDE                       | 0.00  | 0.30  | -5.4 | -5.4 | -5.7 | A | A | A | -94  | -91  | -81  |
| NCGC00093556-01 | Amperozide hydrochloride                 | 0.00  | 0.20  | -5.3 | -5.3 | -5.5 | A | A | A | -95  | -90  | -93  |
| NCGC00091826-01 | N-Isopropyl-N'-phenyl-p-phenylenediamine | 0.00  | 0.05  | -5.3 | -5.3 | -5.4 | A | A | A | -93  | -95  | -95  |

|                 |                                                  |      |       |      |      |      |   |   |   |      |      |      |
|-----------------|--------------------------------------------------|------|-------|------|------|------|---|---|---|------|------|------|
| NCGC00159519-02 | Tolterodina                                      | 0.00 | 0.05  | -5.3 | -5.3 | -5.4 | A | A | A | -99  | -102 | -100 |
| NCGC00160675-01 | Carminomycin                                     | 0.00 | 0.05  | -5.3 | -5.3 | -5.4 | A | A | A | -101 | -109 | -99  |
| NCGC00163163-01 | DIHYDROERGOCRISTINE                              | 0.00 | 0.05  | -5.3 | -5.3 | -5.4 | A | A | A | -98  | -98  | -95  |
| NCGC00167984-01 | TIQUIZIUM BROMIDE                                | 0.00 | 0.05  | -5.3 | -5.3 | -5.4 | A | A | A | -93  | -91  | -91  |
| NCGC00167971-01 | TIOTROPIUM BROMIDE MONOHYDRATE                   | 0.00 | -0.05 | -5.8 | -5.8 | -5.7 | A | A | A | -44  | -46  | -61  |
| NCGC00024246-05 | Daunorubicinum                                   | 0.00 | 0.05  | -5.4 | -5.4 | -5.4 | A | A | A | -99  | -100 | -100 |
| NCGC00159499-02 | QUINIDINE GLUCONATE                              | 0.00 | 0.45  | -6.8 | -6.8 | -7.3 | A | A | A | -95  | -98  | -98  |
| NCGC00181150-01 | BRYOSTATIN-1                                     | 0.00 | 0.30  | -5.4 | -5.4 | -5.7 | A | A | A | -95  | -98  | -91  |
| NCGC00181131-01 | EPOTHILONE B                                     | 0.00 | 0.15  | -8.8 | -8.8 | -9.0 | A | A | A | -72  | -77  | -80  |
| NCGC00095235-01 | ARTENIMOL                                        | 0.00 | 0.15  | -8.6 | -8.6 | -8.7 | A | A | A | -98  | -93  | -96  |
| NCGC00163424-01 | 17-Allylamino-geldanamycin                       | 0.00 | 0.10  | -5.8 | -5.8 | -5.9 | A | A | A | -95  | -95  | -101 |
| NCGC00167492-01 | LERCANIDIPINE HYDROCHLORIDE                      | 0.00 | 0.10  | -5.7 | -5.7 | -5.8 | A | A | A | -96  | -96  | -97  |
| NCGC00094104-01 | MG 624                                           | 0.00 | 0.05  | -5.8 | -5.8 | -5.8 | A | A | A | -88  | -96  | -97  |
| NCGC00095128-01 | ORLISTAT                                         | 0.00 | 0.05  | -5.8 | -5.8 | -5.8 | A | A | A | -89  | -91  | -87  |
| NCGC00160207-01 | Artemisinin                                      | 0.00 | 0.05  | -8.2 | -8.2 | -8.2 | A | A | A | -98  | -95  | -99  |
| NCGC00017089-01 | Monensin sodium salt                             | 0.00 | 0.05  | -7.6 | -7.6 | -7.7 | A | A | A | -100 | -97  | -98  |
| NCGC00091050-02 | PHENYLMERCURIC ACETATE                           | 0.00 | 0.05  | -5.4 | -5.4 | -5.4 | A | A | A | -97  | -94  | -96  |
| NCGC00095285-01 | VINBLASTINE SULFATE                              | 0.00 | 0.05  | -5.5 | -5.5 | -5.5 | A | A | A | -73  | -79  | -83  |
| NCGC00164591-01 | Artemetero                                       | 0.00 | 0.05  | -7.8 | -7.8 | -7.9 | A | A | A | -103 | -106 | -105 |
| NCGC00163135-01 | NIGULDIPINE                                      | 0.00 | 0.00  | -5.4 | -5.4 | -5.4 | A | A | A | -99  | -96  | -101 |
| NCGC00167484-01 | CICLESONIDE                                      | 0.00 | 0.00  | -6.0 | -6.0 | -6.0 | A | A | A | -102 | -100 | -86  |
| NCGC00167513-01 | VANDETANIB                                       | 0.00 | 0.00  | -5.7 | -5.7 | -5.7 | A | A | A | -96  | -97  | -98  |
| NCGC00166015-01 | C.I. Basic Violet 14, free base                  | 0.00 | -0.05 | -5.8 | -5.8 | -5.8 | A | A | A | -93  | -89  | -78  |
| NCGC00164738-01 |                                                  | 0.00 | -0.10 | -5.8 | -5.8 | -5.7 | A | A | A | -97  | -97  | -103 |
| NCGC00013067-01 | cinchonine                                       | 0.00 |       | -6.8 | -6.8 |      | A | A | N | -98  | -80  | -102 |
| NCGC00163507-01 | OCTYLONIUM BROMIDE                               | 0.05 | 0.10  | -4.8 | -4.9 | -4.9 | A | I | I | -101 | -80  | -93  |
| NCGC00164283-01 | Cetyltrimethylammonium bromide                   | 0.05 | 0.25  | -4.9 | -5.0 | -5.2 | A | A | A | -91  | -91  | -84  |
| NCGC00167576-01 | APRINDINE HYDROCHLORIDE                          | 0.05 | 0.10  | -5.2 | -5.3 | -5.3 | A | A | A | -104 | -103 | -100 |
| NCGC00167798-01 | OXALIPLATIN                                      | 0.05 | 0.10  | -5.2 | -5.3 | -5.3 | A | A | A | -88  | -93  | -93  |
| NCGC00095256-01 | QUININE ETHYL CARBONATE                          | 0.05 | 0.10  | -5.4 | -5.4 | -5.5 | A | A | A | -95  | -93  | -103 |
| NCGC00160378-01 | PRANOLII CHLORIDUM                               | 0.05 | 0.10  | -5.2 | -5.2 | -5.3 | A | A | A | -85  | -79  | -84  |
| NCGC00166113-01 | DIPHENYLCYCLOPROPENONE                           | 0.05 | 0.10  | -4.8 | -4.9 | -4.9 | A | A | A | -119 | -120 | -105 |
| NCGC00018292-04 | DISTAMYCIN A                                     | 0.05 | 0.05  | -4.9 | -5.0 | -5.0 | A | A | A | -111 | -110 | -110 |
| NCGC00073294-02 | QUINOCIDUM                                       | 0.05 | -0.25 | -5.4 | -5.5 | -5.2 | A | A | A | -102 | -101 | -123 |
| NCGC00164548-01 | Danofloxacin mesylate                            | 0.05 | 0.05  | -5.7 | -5.8 | -5.8 | A | A | A | -44  | -54  | -56  |
| NCGC00013217-01 | 2,3-DIMERCAPTOBUTANEDIOIC ACID, ARSENIC(3+) SALT | 0.05 | 0.25  | -5.4 | -5.5 | -5.7 | A | A | A | -107 | -111 | -104 |
| NCGC00164639-01 | Arsenic trioxide                                 | 0.05 | 0.25  | -5.4 | -5.5 | -5.7 | A | A | A | -105 | -108 | -97  |
| NCGC00016372-01 | Roxarsone                                        | 0.05 | 0.20  | -5.7 | -5.7 | -5.9 | A | A | A | -91  | -97  | -93  |
| NCGC00093685-01 | Bestatin hydrochloride                           | 0.05 | 0.30  | -5.8 | -5.9 | -6.1 | A | A | A | -85  | -98  | -94  |
| NCGC00016526-02 | Berberine chloride                               | 0.05 | 0.20  | -6.6 | -6.6 | -6.8 | A | A | A | -95  | -94  | -90  |
| NCGC00165966-02 | VINORELBINE TARTRATE                             | 0.05 | 0.15  | -5.6 | -5.7 | -5.8 | A | A | A | -105 | -105 | -102 |
| NCGC00167586-01 | PIROCTONE OLAMINE                                | 0.05 | 0.10  | -5.5 | -5.5 | -5.6 | A | A | A | -102 | -103 | -102 |
| NCGC00168772-01 | LESTAUTINIB                                      | 0.05 | 0.10  | -6.2 | -6.3 | -6.3 | A | A | A | -100 | -101 | -102 |
| NCGC00160275-02 | HELIOMYCINUM                                     | 0.05 | 0.10  | -5.6 | -5.6 | -5.7 | A | A | A | -96  | -90  | -92  |
| NCGC00181319-01 | PLICAMYCIN                                       | 0.05 | 0.10  | -7.3 | -7.4 | -7.4 | A | A | A | -97  | -79  | -96  |
| NCGC00094791-01 | THIMEROSAL                                       | 0.05 | 0.05  | -5.7 | -5.8 | -5.8 | A | A | A | -96  | -96  | -101 |
| NCGC00095029-01 | LASALOCID SODIUM                                 | 0.05 | 0.05  | -6.1 | -6.2 | -6.2 | A | A | A | -96  | -97  | -98  |
| NCGC00095055-01 | SALINOMYCIN, SODIUM                              | 0.05 | 0.05  | -6.4 | -6.4 | -6.4 | A | A | A | -99  | -89  | -89  |
| NCGC00160369-01 | Phanquone                                        | 0.05 | 0.05  | -5.8 | -5.9 | -5.9 | A | A | A | -104 | -104 | -98  |
| NCGC00166066-01 | DIDECYL DIMETHYL AMMONIUM CHLORIDE               | 0.05 | 0.05  | -5.4 | -5.4 | -5.4 | A | A | A | -97  | -96  | -100 |
| NCGC00181306-01 | DOCETAXEL                                        | 0.05 | 0.05  | -7.7 | -7.7 | -7.7 | A | A | A | -78  | -73  | -78  |
| NCGC00015608-04 | LOPERAMIDE                                       | 0.05 | 0.10  | -4.8 | -4.8 | -4.9 | A | A | A | -121 | -118 | -116 |
| NCGC00024584-03 | BROMOCRIPTINE                                    | 0.05 | -0.10 | -5.0 | -5.1 | -4.9 | A | A | A | -107 | -106 | -126 |
| NCGC00164600-01 | ARTEMISININUM                                    | 0.05 | 0.05  | -8.5 | -8.6 | -8.6 | A | A | A | -99  | -104 | -102 |
| NCGC00064532-02 | TROVAFLOXACIN MESYLATE                           | 0.10 | 0.25  | -4.8 | -4.9 | -5.1 | A | I | A | -109 | -79  | -89  |
| NCGC00159451-02 | TINORIDINE HYDROCHLORIDE                         | 0.10 | 0.30  | -5.2 | -5.3 | -5.5 | A | A | A | -104 | -108 | -101 |
| NCGC00161826-01 | PHENYLMERCURIC BORATE                            | 0.10 | 0.30  | -5.2 | -5.3 | -5.5 | A | A | A | -97  | -100 | -87  |
| NCGC00163450-02 | ILOMASTATUM                                      | 0.10 | 0.20  | -5.1 | -5.2 | -5.3 | A | A | A | -84  | -98  | -110 |
| NCGC00159424-02 | TETRAMETHYLTHIURAM MONOSULFIDE                   | 0.10 | 0.05  | -5.2 | -5.3 | -5.2 | A | A | A | -101 | -101 | -105 |
| NCGC00160546-01 | Haloxon                                          | 0.10 | 0.05  | -4.8 | -4.9 | -4.9 | A | A | A | -97  | -84  | -97  |
| NCGC00016283-01 | Diphemanil methylsulfate                         | 0.10 | 0.00  | -5.2 | -5.3 | -5.2 | A | A | A | -88  | -83  | -107 |
| NCGC00095154-01 | TELITHROMYCIN                                    | 0.10 | 0.30  | -6.2 | -6.3 | -6.5 | A | A | A | -35  | -41  | -49  |
| NCGC00021394-03 | ANISOTROPINE METHYLBROMIDE                       | 0.10 | 0.20  | -5.2 | -5.3 | -5.4 | A | A | A | -93  | -87  | -89  |
| NCGC00166121-01 | TETRADONI BROMIDUM                               | 0.10 | 0.05  | -5.3 | -5.4 | -5.4 | A | A | A | -97  | -102 | -98  |

|                 |                                      |      |       |      |      |      |   |   |   |      |      |      |
|-----------------|--------------------------------------|------|-------|------|------|------|---|---|---|------|------|------|
| NCGC00164554-03 | MUPIROCIN                            | 0.10 | 0.15  | -6.9 | -7.0 | -7.0 | A | A | A | -44  | -53  | -63  |
| NCGC00181127-01 | VINROSIDINE SULFATE                  | 0.10 | 0.20  | -5.7 | -5.8 | -5.9 | A | A | A | -91  | -76  | -85  |
| NCGC00015819-06 | PROPAFENONE                          | 0.10 | 0.10  | -5.7 | -5.8 | -5.8 | A | A | A | -96  | -96  | -99  |
| NCGC00018301-02 | SULOCTIDIL                           | 0.10 | 0.05  | -5.8 | -5.9 | -5.9 | A | A | A | -95  | -96  | -98  |
| NCGC00091881-01 | Toxaphene                            | 0.10 | 0.05  | -5.4 | -5.5 | -5.5 | A | A | A | -100 | -104 | -106 |
| NCGC00168784-01 | GEMCITABINE HYDROCHLORIDE            | 0.10 | 0.30  | -5.5 | -5.6 | -5.8 | A | A | A | -115 | -106 | -111 |
| NCGC00016622-02 | HYCANTHONE                           | 0.10 | 0.25  | -5.0 | -5.1 | -5.2 | A | A | A | -92  | -96  | -93  |
| NCGC00016854-03 | VINPOCETINE                          | 0.10 | 0.25  | -5.0 | -5.1 | -5.3 | A | A | A | -107 | -99  | -98  |
| NCGC00015747-03 | NICARDIPINE                          | 0.10 | 0.20  | -5.0 | -5.1 | -5.2 | A | A | A | -106 | -100 | -94  |
| NCGC00181116-01 | CARBOMYCIN                           | 0.10 | 0.20  | -5.0 | -5.1 | -5.2 | A | A | A | -110 | -98  | -119 |
| NCGC00015385-12 | DIPYRIDAMOLE                         | 0.10 | 0.15  | -5.0 | -5.1 | -5.1 | A | A | A | -99  | -99  | -95  |
| NCGC00168750-01 | OXALIPLATIN                          | 0.10 | 0.10  | -5.2 | -5.3 | -5.3 | A | A | A | -90  | -102 | -97  |
| NCGC00181100-01 | ORMELOXIFENUM                        | 0.10 | 0.15  | -5.2 | -5.3 | -5.4 | A | A | A | -104 | -97  | -102 |
| NCGC00025155-01 | Homoharringtonine                    | 0.10 | 0.15  | -7.8 | -7.9 | -7.9 | A | A | A | -98  | -96  | -97  |
| NCGC00159483-02 | HYDROXYCHLOROQUINE SULFATE           | 0.10 | 0.10  | -6.2 | -6.3 | -6.3 | A | A | A | -101 | -102 | -97  |
| NCGC00016046-02 | Tyrphostin 25                        | 0.15 | 0.20  | -4.8 | -5.0 | -5.0 | A | A | A | -123 | -103 | -100 |
| NCGC00016747-03 | DILAZEP                              | 0.15 | 0.20  | -4.8 | -5.0 | -5.0 | A | A | A | -87  | -87  | -78  |
| NCGC00181121-01 | CARPHENAZINE MALEATE                 | 0.15 | 0.20  | -4.8 | -5.0 | -5.0 | A | A | A | -123 | -109 | -110 |
| NCGC00025302-01 | Altanserin hydrochloride             | 0.15 | 0.15  | -4.9 | -5.0 | -5.0 | A | A | A | -114 | -92  | -99  |
| NCGC00160567-01 | Acetomenaphthone                     | 0.15 | 0.05  | -4.9 | -5.0 | -4.9 | A | A | A | -114 | -100 | -112 |
| NCGC00015256-01 | Chloroquine diphosphate              | 0.15 | 0.00  | -7.1 | -7.2 | -7.1 | A | A | A | -100 | -103 | -103 |
| NCGC00095182-01 | GEMIFLOXACIN MESYLATE                | 0.15 | 0.30  | -5.0 | -5.2 | -5.3 | A | A | A | -96  | -91  | -95  |
| NCGC00093976-03 | IDARUBICIN HYDROCHLORIDE             | 0.15 | 0.25  | -4.9 | -5.1 | -5.2 | A | A | A | -127 | -101 | -84  |
| NCGC00094089-01 | Mibefradil dihydrochloride           | 0.15 | 0.10  | -5.2 | -5.4 | -5.3 | A | A | A | -102 | -105 | -99  |
| NCGC00095165-01 | CARMOFUR                             | 0.15 | 0.20  | -5.2 | -5.3 | -5.4 | A | A | A | -86  | -90  | -88  |
| NCGC00181085-01 | MYRISTYL-GAMMA-PICOLINIUM CHLORIDE   | 0.15 | 0.20  | -5.8 | -5.9 | -6.0 | A | A | A | -89  | -92  | -94  |
| NCGC00017063-01 | Amodiaquin dihydrochloride dihydrate | 0.15 | 0.15  | -7.4 | -7.5 | -7.5 | A | A | A | -97  | -99  | -100 |
| NCGC00160524-01 | AMINOQUINOLUM                        | 0.15 | 0.10  | -5.7 | -5.8 | -5.8 | A | A | A | -99  | -100 | -103 |
| NCGC00181132-01 | HALOFUGINONE LACTATE                 | 0.15 | 0.05  | -5.5 | -5.6 | -5.5 | A | A | A | -96  | -99  | -98  |
| NCGC00181139-01 | DEXTROAMPHETAMINE SACCHARATE         | 0.15 | 0.05  | -6.2 | -6.4 | -6.3 | A | A | A | -100 | -96  | -96  |
| NCGC00015251-02 | Clotrimazole                         | 0.15 | 0.00  | -5.9 | -6.0 | -5.9 | A | A | A | -98  | -97  | -97  |
| NCGC00016890-01 | Cyclosporin A                        | 0.20 | 0.25  | -4.8 | -5.0 | -5.1 | A | A | A | -130 | -114 | -113 |
| NCGC00091010-01 | Domiphen bromide                     | 0.20 | 0.20  | -5.1 | -5.3 | -5.3 | A | A | A | -109 | -103 | -97  |
| NCGC00164034-01 | Triclocarban                         | 0.20 | 0.20  | -5.0 | -5.2 | -5.2 | A | A | A | -112 | -99  | -101 |
| NCGC00167481-01 | ACLARUBICIN HYDROCHLORIDE            | 0.20 | 0.35  | -6.4 | -6.6 | -6.8 | A | A | A | -105 | -104 | -100 |
| NCGC00017142-01 | Clofilium tosylate                   | 0.20 | 0.30  | -6.1 | -6.3 | -6.4 | A | A | A | -102 | -101 | -95  |
| NCGC00163237-01 | DECAMETHONIUM                        | 0.20 | 0.30  | -5.9 | -6.1 | -6.2 | A | A | A | -84  | -91  | -87  |
| NCGC00181147-01 | PLICAMYCIN                           | 0.20 | 0.25  | -7.0 | -7.2 | -7.3 | A | A | A | -102 | -95  | -98  |
| NCGC00016752-01 | Clindamycin hydrochloride            | 0.20 |       | -6.7 | -6.9 |      | A | A | N | -46  | -43  | -26  |
| NCGC00013130-03 | AMINOQUINURIDUM                      | 0.25 | 0.20  | -4.9 | -5.1 | -5.1 | A | A | A | -104 | -84  | -89  |
| NCGC00163543-01 | DOXORUBICIN                          | 0.25 | 0.20  | -4.8 | -5.1 | -5.0 | A | A | A | -135 | -117 | -125 |
| NCGC00013058-01 | Malachite Green Oxalate              | 0.25 | 0.15  | -5.0 | -5.2 | -5.1 | A | A | A | -100 | -105 | -99  |
| NCGC00017057-01 | Quinacrine dihydrochloride dihydrate | 0.25 | 0.20  | -6.9 | -7.1 | -7.1 | A | A | A | -99  | -100 | -103 |
| NCGC00163697-01 | CHROMOMYCIN A3                       | 0.25 | 0.05  | -6.9 | -7.2 | -7.0 | A | A | A | -95  | -98  | -95  |
| NCGC00163699-01 | FUMAGILLIN                           | 0.30 | 0.25  | -7.7 | -8.0 | -8.0 | A | A | A | -51  | -54  | -60  |
| NCGC00016284-01 | Primaquine diphosphate               | 0.30 | 0.20  | -5.9 | -6.2 | -6.1 | A | A | A | -102 | -96  | -96  |
| NCGC00181356-01 | OXAPIUM IODIDE                       | 0.30 | 0.40  | -5.4 | -5.7 | -5.8 | A | A | A | -97  | -92  | -93  |
| NCGC00166281-01 | QUININE ASCORBATE                    | 0.30 | 0.35  | -6.3 | -6.6 | -6.7 | A | A | A | -98  | -96  | -97  |
| NCGC00024379-04 | EMETINE                              | 0.30 | 0.30  | -6.6 | -6.9 | -6.9 | A | A | A | -97  | -97  | -96  |
| NCGC00181104-01 | DITHIAZANINE IODIDE                  | 0.30 | 0.30  | -5.5 | -5.8 | -5.8 | A | A | A | -98  | -66  | -97  |
| NCGC00160391-01 | Auranofin                            | 0.35 | 0.30  | -5.4 | -5.8 | -5.7 | A | A | A | -93  | -95  | -93  |
| NCGC00016373-03 | Benzethonium chloride                | 0.40 | 0.35  | -5.4 | -5.8 | -5.7 | A | A | A | -100 | -97  | -93  |
| NCGC00181159-01 | ECTEINASCIDIN 743                    | 0.40 | 0.45  | -8.9 | -9.3 | -9.3 | A | A | A | -102 | -102 | -100 |
| NCGC00093889-03 | PHYSOSTIGMINE                        | 0.45 | 0.45  | -5.3 | -5.8 | -5.8 | A | A | A | -95  | -90  | -87  |
| NCGC00013216-01 | Dimercaprol                          | 0.45 | 0.20  | -5.6 | -6.1 | -5.8 | A | A | A | -94  | -98  | -97  |
| NCGC00015339-02 | Dequalinium dichloride               |      |       | -6.6 |      |      | A | N | N | -103 | -116 | -117 |
| NCGC00016600-01 | Clofazimine                          |      | -0.05 | -5.9 |      | -5.9 | A | N | I | -33  | -20  | -31  |
| NCGC00166247-01 | Quinaldine blue                      |      |       | -6.2 |      |      | A | N | N | -100 | -102 | -101 |
| NCGC00166288-01 | ALAZANINI TRICLOFENAS                |      |       | -6.7 |      |      | A | N | N | -100 | -107 | -101 |
| NCGC00091387-01 | Ethidium bromide                     |      |       | -7.1 |      |      | A | N | N | -105 | -104 | -103 |
| NCGC00094996-01 | ALEXIDINE HYDROCHLORIDE              |      |       | -5.7 |      |      | A | N | N | -96  | -100 | -98  |
| NCGC00161831-02 | Mefloquine hydrochloride             |      |       | -6.9 |      |      | A | N | N | -94  | -95  | -96  |
| NCGC00094807-01 | TYROTHRICIN                          |      |       | -9.4 |      |      | A | N | N | -102 | -119 | -105 |
| NCGC00161622-02 | Actinomycin D <sub>A</sub>           |      |       | -8.3 |      |      | A | N | N | -99  | -106 | -101 |

|                 |                              |       |       |       |      |   |   |   |      |      |      |
|-----------------|------------------------------|-------|-------|-------|------|---|---|---|------|------|------|
| NCGC00167496-01 | METHYLENE BLUE               |       |       |       | -7.6 | A | N | N | -96  | -92  | -93  |
| NCGC00016833-01 | Halofantrine hydrochloride   |       |       |       | -8.0 | A | N | N | -96  | -91  | -93  |
| NCGC00095992-01 | GRAMICIDIN                   |       |       |       | -9.3 | A | N | N | -100 | -105 | -104 |
| NCGC00181109-01 | DECOQUINATE                  | 0.05  |       |       | -8.5 | A | N | A | -95  | -93  | -95  |
| NCGC00016246-03 | Chlorhexidine                |       |       |       | -5.7 | A | N | N | -96  | -103 | -101 |
| NCGC00017022-05 | Pentamidine isethionate      |       |       |       | -6.0 | A | N | N | -103 | -103 | -102 |
| NCGC00163700-01 | VINCRIStINE                  |       |       |       | -6.1 | A | N | N | -68  | -72  | -78  |
| NCGC00016250-01 | Demecarium bromide           |       |       |       | -6.4 | A | N | N | -96  | -94  | -97  |
| NCGC00094849-01 | CALCEIN                      |       |       |       |      | A | A | A | 210  | 310  | 333  |
| NCGC00159347-02 | Fluorescein sodium           |       |       |       |      | A | A | A | 236  | 291  | 308  |
| NCGC00167490-01 | LUMEFANTRINE                 |       |       | -2.93 | -7.5 | A | N | N | -97  | -97  |      |
| NCGC00159455-02 | Gefitinib                    | -0.45 | -0.45 |       | -6.1 | I | I | A | -36  | -59  | -67  |
| NCGC00090753-01 | Azithromycin                 | -0.25 | -0.05 |       | -5.1 | I | I | A | -57  | -70  | -88  |
| NCGC00093759-01 | CNS-1102                     | -0.20 | -0.10 |       | -4.9 | I | I | I | -45  | -43  | -56  |
| NCGC00093664-01 | (?)-Butaclamol hydrochloride | -0.20 | -0.15 |       | -4.9 | I | I | I | -71  | -62  | -80  |
| NCGC00016725-01 | Josamycin                    | -0.20 | 0.10  |       | -5.5 | I | I | I | -41  | -54  | -63  |
| NCGC00016714-01 | Thiamphenicol                | -0.15 | 0.00  |       | -5.3 | I | I | I | -32  | -38  | -47  |
| NCGC00164543-01 | Lomerizine                   | -0.15 | -0.10 |       | -4.9 | I | I | I | -104 | -110 | -110 |
| NCGC00094736-01 | NITROMIDE                    | -0.15 | -0.15 |       | -4.9 | I | I | I | -39  | -37  | -46  |
| NCGC00159325-02 | Desloratadine                | -0.15 | -0.15 |       | -4.9 | I | I | I | -89  | -98  | -100 |
| NCGC00159417-02 | Triclosan                    | -0.15 | -0.15 |       | -4.9 | I | I | I | -80  | -85  | -97  |
| NCGC00163168-01 | MESULERGINE                  | -0.15 | -0.15 |       | -4.9 | I | I | I | -47  | -44  | -63  |
| NCGC00164559-01 | DULOxETINE HYDROCHLORIDE     | -0.15 | -0.15 |       | -4.9 | I | I | I | -87  | -86  | -96  |
| NCGC00068236-02 | GATIFLOXACIN                 | -0.15 | -0.20 |       | -4.9 | I | I | I | -42  | -39  | -50  |
| NCGC00017366-04 | PERGOLIDE METHANESULFONATE   | -0.15 | -0.20 |       | -4.9 | I | I | I | -68  | -66  | -76  |
| NCGC00016922-01 | Florfenicol                  | -0.15 | -0.10 |       | -5.4 | I | I | I | -39  | -57  | -58  |
| NCGC00164563-01 | ENTECAVIR                    | -0.15 | 0.05  |       | -5.0 | I | A | A | -58  | -89  | -79  |
| NCGC00016862-01 | Budesonide                   | -0.10 | 0.00  |       | -4.9 | I | I | I | -48  | -63  | -69  |
| NCGC00018102-06 | FLUNARIZINE                  | -0.10 | 0.00  |       | -4.8 | I | I | I | -105 | -120 | -113 |
| NCGC00091032-03 | Cyproterone acetate          | -0.10 | 0.00  |       | -4.8 | I | I | I | -57  | -60  | -73  |
| NCGC00095303-02 | Cloxyquin                    | -0.10 | 0.00  |       | -4.8 | I | I | I | -50  | -71  | -62  |
| NCGC00160365-01 | CYSTEINE HYDROCHLORIDE       | -0.10 | -0.05 |       | -4.8 | I | I | I | -93  | -60  | -107 |
| NCGC00016507-01 | Thonzonium bromide           | -0.10 | -0.10 |       | -5.2 | I | I | I | -68  | -92  | -93  |
| NCGC00024928-06 | Tamoxifen citrate            | -0.10 | -0.10 |       | -4.8 | I | I | I | -65  | -81  | -88  |
| NCGC00163169-01 | PIZOTIFEN                    | -0.10 | -0.10 |       | -4.8 | I | I | I | -51  | -54  | -60  |
| NCGC00163179-01 | U-69593                      | -0.10 | -0.10 |       | -4.8 | I | I | I | -79  | -90  | -96  |
| NCGC00167538-01 | CLORPRENAlINE HYDROCHLORIDE  | -0.10 | -0.10 |       | -4.9 | I | I | I | -74  | -94  | -84  |
| NCGC00015096-07 | AMIODARONE                   | -0.10 | -0.15 |       | -4.9 | I | I | I | -103 | -116 | -110 |
| NCGC00164545-01 | Lacidipine                   | -0.10 | 0.05  |       | -4.9 | I | A | I | -105 | -131 | -107 |
| NCGC00159333-02 | SPARFLOXACIN                 | -0.10 | 0.20  |       | -4.8 | I | I | I | -82  | -56  | -44  |
| NCGC00016260-05 | Ethacrynic acid              | -0.10 | 0.00  |       | -4.8 | I | I | A | -85  | -98  | -98  |
| NCGC00164486-01 | Ciclovalona                  | -0.10 | -0.05 |       | -4.8 | I | I | A | -111 | -97  | -103 |
| NCGC00091469-01 | Saquinavir Mesylate          | -0.10 |       |       | -4.8 | I | I | N | -67  | -36  | -31  |
| NCGC00015054-06 | TACRINE                      | -0.10 | -0.05 |       | -4.9 | I | I | I | -38  | -102 | -98  |
| NCGC00167542-01 | TIAMULIN                     | -0.10 | 0.15  |       | -5.0 | I | I | A | -63  | -62  | -66  |
| NCGC00161422-01 | BIBX 1382 dihydrochloride    | -0.10 | 0.00  |       | -4.9 | I | A | A | -97  | -120 | -111 |
| NCGC00091146-02 | Fenotiazina                  | -0.05 | 0.10  |       | -4.8 | I | I | I | -55  | -65  | -63  |
| NCGC00094220-02 | PROADIFEN HYDROCHLORIDE      | -0.05 | 0.05  |       | -4.8 | I | I | I | -106 | -127 | -108 |
| NCGC00166245-01 | PROFLAVINE HEMISULFATE       | -0.05 | 0.05  |       | -4.8 | I | I | I | -102 | -113 | -99  |
| NCGC00015846-10 | Phenylbutazone               | -0.05 | 0.00  |       | -4.8 | I | I | I | -99  | -97  | -98  |
| NCGC00017291-05 | RIBOFLAVIN                   | -0.05 | 0.00  |       | -4.8 | I | I | I | -37  | -54  | -52  |
| NCGC00095304-02 | Furazolidone                 | -0.05 | 0.00  |       | -4.8 | I | I | I | -100 | -107 | -98  |
| NCGC00160678-01 | Fenoverina                   | -0.05 | 0.00  |       | -4.8 | I | I | I | -61  | -62  | -77  |
| NCGC00015300-05 | GBR-12909                    | -0.05 | -0.05 |       | -4.8 | I | I | I | -112 | -105 | -120 |
| NCGC00181034-01 | LIARozOLE                    | -0.05 | -0.05 |       | -4.8 | I | I | I | -111 | -117 | -131 |
| NCGC00164631-01 | Sunitinib malate             | -0.05 | -0.10 |       | -4.8 | I | I | I | -103 | -114 | -110 |
| NCGC00167500-01 | ETRETINATE                   | -0.05 | -0.10 |       | -4.8 | I | I | I | -89  | -84  | -101 |
| NCGC00094486-01 | SKF 95282 dimaleate          | -0.05 | 0.20  |       | -4.8 | I | I | I | -59  | -60  | -61  |
| NCGC00159321-02 | CLOPIDOGREL BISULFATE        | -0.05 | 0.10  |       | -4.8 | I | I | I | -66  | -55  | -68  |
| NCGC00093619-02 | Opipramol dihydrochloride    | -0.05 | 0.10  |       | -4.8 | I | I | A | -102 | -121 | -116 |
| NCGC00015998-04 | Thiothixene Hydrochloride    | -0.05 | 0.05  |       | -4.8 | I | I | A | -105 | -128 | -116 |
| NCGC00164610-01 | TRICLABENDAZOLUM             | -0.05 | 0.10  |       | -4.8 | I | I | I | -82  | -94  | -94  |
| NCGC00181168-01 | TRIFLUOMEPRAZINE MALEATE     | -0.05 | 0.10  |       | -4.7 | I | I | I | -43  | -36  | -47  |
| NCGC00018204-09 | VINPOCETINE                  | -0.05 | 0.05  |       | -4.8 | I | I | I | -38  | -52  | -55  |



|                 |                                                       |       |       |      |      |      |  |   |   |      |      |      |
|-----------------|-------------------------------------------------------|-------|-------|------|------|------|--|---|---|------|------|------|
| NCGC00024378-05 | LOBELINE                                              | -0.05 | 0.05  | -4.8 | -4.7 | -4.8 |  |   |   | -61  | -45  | -66  |
| NCGC00093935-01 | Flupirtine maleate                                    | -0.05 | 0.05  | -4.8 | -4.7 | -4.8 |  |   |   | -118 | -110 | -104 |
| NCGC00094306-02 | PROPANTHELINE BROMIDE                                 | -0.05 | 0.05  | -4.8 | -4.7 | -4.8 |  |   |   | -83  | -78  | -83  |
| NCGC00159388-02 | PENTAERYTHRITOL TETRANITRATE                          | -0.05 | 0.05  | -4.8 | -4.7 | -4.8 |  |   |   | -84  | -88  | -89  |
| NCGC00015053-05 | AA-861                                                | -0.05 | 0.00  | -4.8 | -4.7 | -4.8 |  |   |   | -81  | -84  | -85  |
| NCGC00015264-08 | CLOMIPRAMINE                                          | -0.05 | 0.00  | -4.8 | -4.7 | -4.8 |  |   |   | -59  | -46  | -73  |
| NCGC00094446-03 | LEVAMISOLE HYDROCHLORIDE                              | -0.05 | 0.00  | -4.8 | -4.7 | -4.8 |  |   |   | -109 | -114 | -110 |
| NCGC00160566-01 | Broquinolol                                           | -0.05 | 0.00  | -4.8 | -4.7 | -4.8 |  |   |   | -121 | -106 | -112 |
| NCGC00160664-01 | Nitroxoline                                           | -0.05 | 0.00  | -4.8 | -4.7 | -4.8 |  |   |   | -119 | -110 | -108 |
| NCGC00181312-01 | BIPERIDEN HYDROCHLORIDE                               | -0.05 | 0.00  | -4.8 | -4.7 | -4.8 |  |   |   | -75  | -71  | -78  |
| NCGC00013495-01 | Benztropine                                           | -0.05 | -0.05 | -4.8 | -4.7 | -4.7 |  |   |   | -56  | -50  | -79  |
| NCGC00014482-01 | Bristaline                                            | -0.05 | -0.05 | -4.8 | -4.7 | -4.7 |  |   |   | -108 | -89  | -118 |
| NCGC00014648-01 | benzylhydrochlorothiazide                             | -0.05 | -0.05 | -4.8 | -4.7 | -4.7 |  |   |   | -70  | -72  | -78  |
| NCGC00016290-01 | Demeclocycline hydrochloride                          | -0.05 | -0.05 | -4.8 | -4.7 | -4.7 |  |   |   | -42  | -50  | -61  |
| NCGC00016821-01 | Etoposide                                             | -0.05 | -0.05 | -4.8 | -4.7 | -4.7 |  |   |   | -78  | -76  | -83  |
| NCGC00017159-05 | Curcumin                                              | -0.05 | -0.05 | -4.8 | -4.7 | -4.7 |  |   |   | -96  | -78  | -87  |
| NCGC00018098-04 | IODOQUINOL                                            | -0.05 | -0.05 | -4.8 | -4.7 | -4.7 |  |   |   | -85  | -80  | -84  |
| NCGC00024777-02 | SNC 80                                                | -0.05 | -0.05 | -4.8 | -4.7 | -4.7 |  |   |   | -121 | -99  | -103 |
| NCGC00024809-02 | PRONETHALOL                                           | -0.05 | -0.05 | -4.9 | -4.8 | -4.8 |  |   |   | -104 | -107 | -106 |
| NCGC00025167-01 | Formoterol hemifumarate                               | -0.05 | -0.05 | -4.8 | -4.7 | -4.7 |  |   |   | -88  | -79  | -95  |
| NCGC00094434-01 | Na-p-Tosyl-L-lysine chloromethyl ketone hydrochloride | -0.05 | -0.05 | -4.8 | -4.7 | -4.7 |  |   |   | -66  | -64  | -69  |
| NCGC00160383-01 | Lenperone                                             | -0.05 | -0.05 | -4.9 | -4.9 | -4.9 |  |   |   | -44  | -65  | -78  |
| NCGC00164578-01 | ETORICOXIB                                            | -0.05 | -0.05 | -4.8 | -4.7 | -4.7 |  |   |   | -57  | -48  | -78  |
| NCGC00160607-01 | N-METHYL-3-PIPERIDYL BENZILATE                        | -0.05 | 0.00  | -4.9 | -4.9 | -4.9 |  |   |   | -47  | -54  | -64  |
| NCGC00013051-05 | t-Butylhydroquinone                                   | -0.05 | -0.05 | -4.9 | -4.9 | -4.9 |  |   | A | -94  | -107 | -112 |
| NCGC00016959-01 | Ciprofloxacin hydrochloride                           | -0.05 | 0.05  | -5.3 | -5.3 | -5.4 |  |   | A | -55  | -70  | -70  |
| NCGC00016576-01 | Thiostrepton                                          | -0.05 | 0.30  | -5.2 | -5.2 | -5.5 |  | A | A | -69  | -86  | -65  |
| NCGC00163158-01 | S(-)-LISURIDE                                         | 0.00  | 0.20  | -4.7 | -4.7 | -4.9 |  |   |   | -44  | -38  | -47  |
| NCGC00160568-01 | HALETAZOLUM                                           | 0.00  | 0.15  | -4.7 | -4.7 | -4.9 |  |   |   | -78  | -68  | -79  |
| NCGC00166397-02 | LOFEPRAMINE HYDROCHLORIDE                             | 0.00  | 0.15  | -4.7 | -4.7 | -4.9 |  |   |   | -86  | -77  | -76  |
| NCGC00017136-01 | Doxazosin mesylate                                    | 0.00  | 0.10  | -4.7 | -4.7 | -4.8 |  |   |   | -102 | -89  | -93  |
| NCGC00024595-03 | CARBETAPENTANE                                        | 0.00  | 0.10  | -4.7 | -4.7 | -4.8 |  |   |   | -114 | -120 | -117 |
| NCGC00024885-01 | Olvanil                                               | 0.00  | 0.10  | -4.7 | -4.7 | -4.8 |  |   |   | -57  | -70  | -80  |
| NCGC00095071-01 | AMCINONIDE                                            | 0.00  | 0.10  | -4.7 | -4.7 | -4.8 |  |   |   | -73  | -58  | -74  |
| NCGC00095196-01 | TILORONE                                              | 0.00  | 0.10  | -4.7 | -4.7 | -4.8 |  |   |   | -111 | -111 | -113 |
| NCGC00095280-01 | ENOXAPARIN SODIUM (1% wt/vol in 10%aqueous DMSO)      | 0.00  | 0.10  | -4.7 | -4.7 | -4.8 |  |   |   | -71  | -60  | -87  |
| NCGC00162247-02 | LEVALLORPHAN                                          | 0.00  | 0.10  | -4.7 | -4.7 | -4.8 |  |   |   | -115 | -118 | -115 |
| NCGC00165907-02 | TRIPARANOLUM                                          | 0.00  | 0.10  | -4.7 | -4.7 | -4.8 |  |   |   | -103 | -81  | -90  |
| NCGC00181134-01 | HALOPROGIN                                            | 0.00  | 0.10  | -4.7 | -4.7 | -4.8 |  |   |   | -45  | -41  | -46  |
| NCGC00015964-09 | SPIPERONE                                             | 0.00  | 0.05  | -4.8 | -4.8 | -4.8 |  |   |   | -62  | -50  | -66  |
| NCGC00090774-01 | Nitazoxanide                                          | 0.00  | 0.05  | -4.8 | -4.8 | -4.8 |  |   |   | -95  | -94  | -83  |
| NCGC00160527-01 | MOSAPRIDE CITRATE                                     | 0.00  | 0.05  | -4.8 | -4.8 | -4.8 |  |   |   | -63  | -82  | -98  |
| NCGC00016059-05 | THIORIDAZINE                                          | 0.00  | 0.05  | -4.7 | -4.7 | -4.8 |  |   |   | -80  | -81  | -93  |
| NCGC00016824-01 | Clocortolone pivalate                                 | 0.00  | 0.05  | -4.8 | -4.8 | -4.9 |  |   |   | -80  | -83  | -86  |
| NCGC00025216-01 | Roxindole hydrochloride                               | 0.00  | 0.05  | -4.7 | -4.7 | -4.8 |  |   |   | -47  | -64  | -73  |
| NCGC00091268-01 | Oxytetracycline HCl                                   | 0.00  | 0.05  | -4.7 | -4.7 | -4.8 |  |   |   | -49  | -59  | -67  |
| NCGC00159490-02 | OXYTETRACYCLINE                                       | 0.00  | 0.05  | -4.7 | -4.7 | -4.8 |  |   |   | -58  | -61  | -76  |
| NCGC00159551-01 | DEVAZEPIDUM                                           | 0.00  | 0.05  | -4.7 | -4.7 | -4.8 |  |   |   | -83  | -72  | -74  |
| NCGC00166153-01 | Climbazole                                            | 0.00  | 0.05  | -4.7 | -4.7 | -4.8 |  |   |   | -103 | -92  | -103 |
| NCGC00181020-01 | ZEAXANTHIN                                            | 0.00  | 0.05  | -4.7 | -4.7 | -4.8 |  |   |   | -61  | -39  | -62  |
| NCGC00181300-01 | RIBOFLAVIN BUTYRATE                                   | 0.00  | 0.05  | -4.7 | -4.7 | -4.8 |  |   |   | -66  | -63  | -63  |
| NCGC00013034-01 | Depoestradiol                                         | 0.00  | 0.00  | -4.7 | -4.7 | -4.7 |  |   |   | -87  | -49  | -82  |
| NCGC00014485-01 | Etymemazine hydrochloride                             | 0.00  | 0.00  | -4.7 | -4.7 | -4.7 |  |   |   | -73  | -69  | -74  |
| NCGC00015246-02 | Cinnarizine                                           | 0.00  | 0.00  | -5.1 | -5.1 | -5.1 |  |   |   | -38  | -36  | -42  |
| NCGC00015412-06 | Ebselen                                               | 0.00  | 0.00  | -4.7 | -4.7 | -4.7 |  |   |   | -114 | -118 | -117 |
| NCGC00015444-04 | FENOLDOPAM                                            | 0.00  | 0.00  | -4.7 | -4.7 | -4.7 |  |   |   | -67  | -73  | -100 |
| NCGC00015846-11 | PHENYLBUTAZONE                                        | 0.00  | 0.00  | -4.7 | -4.7 | -4.7 |  |   |   | -105 | -105 | -110 |
| NCGC00016291-01 | Tetracycline hydrochloride                            | 0.00  | 0.00  | -5.1 | -5.1 | -5.1 |  |   |   | -41  | -53  | -69  |
| NCGC00016423-03 | Gossypol                                              | 0.00  | 0.00  | -4.7 | -4.7 | -4.7 |  |   |   | -95  | -89  | -91  |
| NCGC00016695-01 | Vitamin K2                                            | 0.00  | 0.00  | -4.8 | -4.8 | -4.8 |  |   |   | -93  | -87  | -86  |
| NCGC00016748-01 | Parthenolide                                          | 0.00  | 0.00  | -4.7 | -4.7 | -4.7 |  |   |   | -44  | -47  | -47  |
| NCGC00017071-01 | Isoetharine mesylate salt                             | 0.00  | 0.00  | -4.7 | -4.7 | -4.7 |  |   |   | -57  | -56  | -66  |
| NCGC00017343-07 | Retinol                                               | 0.00  | 0.00  | -4.7 | -4.7 | -4.7 |  |   |   | -77  | -70  | -77  |
| NCGC00022680-04 | CHLORMADINONE ACETATE                                 | 0.00  | 0.00  | -4.7 | -4.7 | -4.7 |  |   |   | -64  | -73  | -77  |

|                 |                                                                       |      |       |      |      |      |  |   |   |      |      |      |
|-----------------|-----------------------------------------------------------------------|------|-------|------|------|------|--|---|---|------|------|------|
| NCGC00023722-05 | Floxuridine                                                           | 0.00 | 0.00  | -4.7 | -4.7 | -4.7 |  |   |   | -69  | -83  | -89  |
| NCGC00024778-01 | Bifemelane                                                            | 0.00 | 0.00  | -4.7 | -4.7 | -4.7 |  |   |   | -42  | -41  | -48  |
| NCGC00025187-01 | Rimcazole dihydrochloride                                             | 0.00 | 0.00  | -4.8 | -4.8 | -4.8 |  |   |   | -83  | -96  | -93  |
| NCGC00090686-04 | Nitrofurazone                                                         | 0.00 | 0.00  | -4.7 | -4.7 | -4.7 |  |   |   | -83  | -87  | -87  |
| NCGC00090752-03 | Retinoic acid p-hydroxyanilide                                        | 0.00 | 0.00  | -4.7 | -4.7 | -4.7 |  |   |   | -103 | -102 | -109 |
| NCGC00090757-02 | Melphalan                                                             | 0.00 | 0.00  | -4.7 | -4.7 | -4.7 |  |   |   | -41  | -79  | -73  |
| NCGC00090782-03 | Nelfinavir Mesylate                                                   | 0.00 | 0.00  | -4.7 | -4.7 | -4.7 |  |   |   | -105 | -92  | -94  |
| NCGC00094556-01 | AVERMECTIN B1                                                         | 0.00 | 0.00  | -4.7 | -4.7 | -4.7 |  |   |   | -108 | -108 | -108 |
| NCGC00095842-01 | RIFAXIMIN                                                             | 0.00 | 0.00  | -4.8 | -4.8 | -4.8 |  |   |   | -110 | -109 | -113 |
| NCGC00095843-01 | TOMATINE                                                              | 0.00 | 0.00  | -4.7 | -4.7 | -4.7 |  |   |   | -102 | -117 | -95  |
| NCGC00159318-03 | CHLORDIAZEPOXIDE                                                      | 0.00 | 0.00  | -4.7 | -4.7 | -4.7 |  |   |   | -88  | -91  | -90  |
| NCGC00159423-02 | Phytonadione                                                          | 0.00 | 0.00  | -4.7 | -4.7 | -4.7 |  |   |   | -71  | -42  | -70  |
| NCGC00160448-01 | Tibrofam                                                              | 0.00 | 0.00  | -4.7 | -4.7 | -4.7 |  |   |   | -115 | -115 | -117 |
| NCGC00163155-01 | BOPINDOLOL                                                            | 0.00 | 0.00  | -4.7 | -4.7 | -4.7 |  |   |   | -110 | -103 | -108 |
| NCGC00164139-02 | OCTRIZOLUM                                                            | 0.00 | 0.00  | -4.7 | -4.7 | -4.7 |  |   |   | -94  | -93  | -101 |
| NCGC00164537-01 | Droxidopa                                                             | 0.00 | 0.00  | -4.7 | -4.7 | -4.7 |  |   |   | -109 | -109 | -106 |
| NCGC00164618-01 | RALTITREXED                                                           | 0.00 | 0.00  | -4.7 | -4.7 | -4.7 |  |   |   | -39  | -43  | -52  |
| NCGC00164624-01 | ADEFOVIR DIPIVOXIL                                                    | 0.00 | 0.00  | -4.7 | -4.7 | -4.7 |  |   |   | -104 | -104 | -108 |
| NCGC00166134-01 | ESTRADIOL CYPIONATE                                                   | 0.00 | 0.00  | -4.7 | -4.7 | -4.7 |  |   |   | -74  | -46  | -77  |
| NCGC00181002-01 | CINACALCET HYDROCHLORIDE                                              | 0.00 | 0.00  | -4.7 | -4.7 | -4.7 |  |   |   | -117 | -114 | -120 |
| NCGC00181014-01 | ALFACALCIDOL                                                          | 0.00 | 0.00  | -4.7 | -4.7 | -4.7 |  |   |   | -64  | -70  | -66  |
| NCGC00181019-01 | TESTOSTERONE ISOCAPROATE                                              | 0.00 | 0.00  | -4.7 | -4.7 | -4.7 |  |   |   | -95  | -97  | -106 |
| NCGC00181103-01 | PROPIVERINE HYDROCHLORIDE                                             | 0.00 | 0.00  | -4.7 | -4.7 | -4.7 |  |   |   | -46  | -55  | -66  |
| NCGC00181120-01 | ACETOPHENAZINE MALEATE                                                | 0.00 | 0.00  | -4.7 | -4.7 | -4.7 |  |   |   | -87  | -89  | -99  |
| NCGC00181351-01 | Benzamide, N-[[[4-(acetylamino)phenyl]amino]thioxomethyl]-4-(1,1-dime | 0.00 | 0.00  | -4.7 | -4.7 | -4.7 |  |   |   | -89  | -91  | -101 |
| NCGC00159510-02 | Aripiprazole                                                          | 0.00 | -0.05 | -4.8 | -4.8 | -4.7 |  |   |   | -104 | -106 | -100 |
| NCGC00090762-01 | Rifabutin                                                             | 0.00 | -0.05 | -4.8 | -4.8 | -4.8 |  |   |   | -100 | -86  | -109 |
| NCGC00094484-01 | Trifluoperidol hydrochloride                                          | 0.00 | -0.05 | -4.8 | -4.8 | -4.8 |  |   |   | -83  | -73  | -87  |
| NCGC00162150-01 | Cilnidipine                                                           | 0.00 | -0.05 | -4.8 | -4.8 | -4.8 |  |   |   | -60  | -59  | -82  |
| NCGC00167489-01 | SARPOGRELATE HYDROCHLORIDE                                            | 0.00 | 0.00  | -4.8 | -4.8 | -4.8 |  | A |   | -103 | -112 | -104 |
| NCGC00016931-01 | Isradipine                                                            | 0.00 | 0.25  | -5.1 | -5.1 | -5.4 |  |   |   | -42  | -43  | -53  |
| NCGC00016693-01 | Doxycycline hydrochloride                                             | 0.00 | 0.10  | -5.2 | -5.2 | -5.3 |  |   |   | -52  | -55  | -60  |
| NCGC00015195-03 | 3-alpha-[(4-CHLOROPHENYL)PHENYLMETHOXY]TROPANE                        | 0.00 | 0.15  | -4.8 | -4.8 | -5.0 |  |   | A | -89  | -81  | -93  |
| NCGC00013683-01 | Chlorprothixene                                                       | 0.00 | 0.10  | -4.7 | -4.7 | -4.8 |  |   | A | -72  | -55  | -76  |
| NCGC00016966-01 | Sertaconazole nitrate                                                 | 0.00 | 0.10  | -5.1 | -5.1 | -5.2 |  |   | A | -103 | -103 | -108 |
| NCGC00181048-01 | DOLASETRON MESYLATE                                                   | 0.00 | 0.10  | -4.8 | -4.8 | -4.9 |  |   | A | -73  | -72  | -88  |
| NCGC00091950-01 | 9-Aminoacridine HCl H2O                                               | 0.00 | 0.05  | -4.8 | -4.8 | -4.9 |  |   | A | -111 | -109 | -120 |
| NCGC00016950-01 | Mometasone furate                                                     | 0.00 | 0.00  | -5.2 | -5.2 | -5.2 |  |   | A | -109 | -108 | -114 |
| NCGC00094976-01 | GLUTATHIONE                                                           | 0.00 | 0.00  | -4.7 | -4.7 | -4.7 |  |   | A | -104 | -105 | -114 |
| NCGC00159456-02 | IMATINIB MESYLATE                                                     | 0.00 | 0.00  | -4.8 | -4.8 | -4.8 |  |   | A | -108 | -110 | -122 |
| NCGC00016800-01 | Isoconazole                                                           | 0.00 | -0.05 | -5.2 | -5.2 | -5.2 |  |   | A | -97  | -100 | -119 |
| NCGC00015436-07 | FLUPHENAZINE                                                          | 0.00 | 0.20  | -4.8 | -4.8 | -5.0 |  | A | A | -101 | -117 | -103 |
| NCGC00167567-01 | NITROBLUE TETRAZOLIUM CHLORIDE                                        | 0.00 | 0.10  | -4.8 | -4.8 | -4.9 |  | A | A | -99  | -113 | -106 |
| NCGC00162179-02 | cis-(Z)-FLUPENTHIXOL                                                  | 0.00 | 0.00  | -4.8 | -4.8 | -4.8 |  | A | A | -103 | -100 | -112 |
| NCGC00091532-02 | Clorophene                                                            | 0.05 | 0.15  | -4.7 | -4.8 | -4.9 |  |   |   | -100 | -62  | -93  |
| NCGC00161326-04 | CALCIFEDIOL                                                           | 0.05 | 0.15  | -4.7 | -4.8 | -4.9 |  |   |   | -109 | -89  | -103 |
| NCGC00164620-01 | Nadifloxacin                                                          | 0.05 | 0.10  | -4.7 | -4.8 | -4.8 |  |   |   | -62  | -63  | -72  |
| NCGC00167569-01 | MEFENOREX                                                             | 0.05 | 0.10  | -4.7 | -4.8 | -4.8 |  |   |   | -114 | -109 | -107 |
| NCGC00181091-01 | BUNAMIDINE HYDROCHLORIDE                                              | 0.05 | 0.10  | -4.7 | -4.8 | -4.8 |  |   |   | -114 | -116 | -113 |
| NCGC00025179-05 | MifepristoneA                                                         | 0.05 | 0.05  | -4.7 | -4.8 | -4.8 |  |   |   | -114 | -126 | -123 |
| NCGC00093366-03 | Arsanilic acid                                                        | 0.05 | 0.05  | -4.7 | -4.8 | -4.8 |  |   |   | -45  | -59  | -81  |
| NCGC00159318-02 | CHLORDIAZEPOXIDE                                                      | 0.05 | 0.05  | -4.7 | -4.8 | -4.8 |  |   |   | -93  | -94  | -91  |
| NCGC00164575-01 | TULATHROMYCIN                                                         | 0.05 | 0.05  | -4.7 | -4.8 | -4.8 |  |   |   | -55  | -80  | -93  |
| NCGC00168748-01 | ROTIGOTINE                                                            | 0.05 | 0.05  | -4.7 | -4.8 | -4.8 |  |   |   | -100 | -105 | -104 |
| NCGC00015469-05 | GUANFACINE                                                            | 0.05 | 0.00  | -4.8 | -4.9 | -4.8 |  |   |   | -46  | -43  | -66  |
| NCGC00024762-02 | N,N-DIETHYL-2-[4-(PHENYLMETHYL)PHENOXY]ETHANAMINE                     | 0.05 | 0.00  | -4.7 | -4.8 | -4.7 |  |   |   | -111 | -112 | -121 |
| NCGC00095025-01 | PERHEXILINE MALEATE                                                   | 0.05 | 0.00  | -4.9 | -4.9 | -4.9 |  |   |   | -110 | -102 | -105 |
| NCGC00160676-01 | APROFENUM                                                             | 0.05 | 0.00  | -4.9 | -4.9 | -4.9 |  |   |   | -33  | -44  | -61  |
| NCGC00163224-01 | BUTYLSCOPOLAMMONIUM                                                   | 0.05 | 0.00  | -4.7 | -4.8 | -4.7 |  |   |   | -43  | -53  | -59  |
| NCGC00166104-01 | THIOCTIC ACID AMIDE                                                   | 0.05 | 0.00  | -4.7 | -4.8 | -4.7 |  |   |   | -90  | -77  | -85  |
| NCGC00167424-01 | TIPEPIDINE HIBENZATE                                                  | 0.05 | 0.00  | -4.7 | -4.8 | -4.7 |  |   |   | -53  | -57  | -69  |
| NCGC00091182-01 | TEROXIRONUM                                                           | 0.05 | -0.05 | -4.9 | -4.9 | -4.8 |  |   |   | -61  | -65  | -81  |
| NCGC00016504-01 | Droperidol                                                            | 0.05 | -0.05 | -4.8 | -4.9 | -4.8 |  |   |   | -48  | -64  | -76  |
| NCGC00094806-01 | TUAMINOHEPTANE SULFATE                                                | 0.05 | -0.05 | -4.8 | -4.9 | -4.8 |  |   |   | -62  | -81  | -90  |

|                 |                                                         |      |       |      |      |      |  |   |   |      |      |      |
|-----------------|---------------------------------------------------------|------|-------|------|------|------|--|---|---|------|------|------|
| NCGC00095078-01 | CLOBETASOL PROPIONATE                                   | 0.05 | -0.05 | -4.8 | -4.9 | -4.8 |  |   |   | -110 | -94  | -117 |
| NCGC00013226-01 | Fluoperazine                                            | 0.05 | -0.10 | -4.8 | -4.9 | -4.7 |  |   |   | -74  | -55  | -77  |
| NCGC00167498-01 | THIAMPHENICOL AMINOACETATE HYDROCHLORIDE                | 0.05 | 0.05  | -4.8 | -4.9 | -4.9 |  |   |   | -48  | -43  | -69  |
| NCGC00094620-01 | CHLORAMPHENICOL                                         | 0.05 | -0.05 | -4.9 | -5.0 | -4.9 |  |   |   | -33  | -45  | -64  |
| NCGC00015904-02 | RIBAVIRIN                                               | 0.05 | 0.15  | -4.8 | -4.9 | -5.0 |  |   |   | -39  | -66  | -69  |
| NCGC00163616-01 | ROSAMICIN                                               | 0.05 | 0.15  | -5.4 | -5.4 | -5.5 |  |   |   | -49  | -39  | -61  |
| NCGC00016812-01 | Butoconazole nitrate                                    | 0.05 | 0.15  | -5.1 | -5.1 | -5.2 |  |   | A | -108 | -112 | -110 |
| NCGC00015500-10 | HALOPERIDOL                                             | 0.05 | 0.05  | -4.8 | -4.9 | -4.9 |  |   | A | -83  | -71  | -93  |
| NCGC00017006-01 | Tridihexethyl chloride                                  | 0.05 | 0.00  | -5.2 | -5.2 | -5.2 |  |   | A | -64  | -74  | -90  |
| NCGC00167451-01 | HALOBETASOL PROPIONATE                                  | 0.05 | 0.00  | -4.8 | -4.9 | -4.8 |  |   | A | -103 | -101 | -126 |
| NCGC00017134-01 | Meclocycline sulfosalicylate                            | 0.05 | 0.20  | -5.2 | -5.2 | -5.4 |  |   | A | -58  | -53  | -71  |
| NCGC00164633-01 | Nisoldipine                                             | 0.05 | -0.05 | -4.8 | -4.9 | -4.8 |  | A | A | -106 | -120 | -130 |
| NCGC00095125-01 | LOSARTAN                                                | 0.05 |       | -4.7 | -4.8 |      |  | A | N | -73  | -96  | -96  |
| NCGC00015714-09 | NIMODIPINE                                              | 0.05 | 0.15  | -4.8 | -4.8 | -4.9 |  |   |   | -47  | -56  | -57  |
| NCGC00016777-01 | Probucol                                                | 0.05 | 0.15  | -5.1 | -5.2 | -5.3 |  |   |   | -77  | -59  | -74  |
| NCGC00016841-01 | Penbutolol sulfate                                      | 0.05 | 0.15  | -5.1 | -5.2 | -5.3 |  |   |   | -98  | -91  | -92  |
| NCGC00018271-03 | HOMOCHLORCYCLIZINE                                      | 0.05 | 0.10  | -4.8 | -4.8 | -4.9 |  |   |   | -68  | -66  | -76  |
| NCGC00160544-01 | 6-METHYL-16-METHYLENE-3,20-DIOXOPREGNA-4,6-DIEN-17-ALPH | 0.05 | 0.10  | -4.8 | -4.8 | -4.9 |  |   |   | -86  | -75  | -79  |
| NCGC00164572-01 | RIMONABANT                                              | 0.05 | 0.05  | -4.8 | -4.8 | -4.8 |  |   |   | -115 | -114 | -120 |
| NCGC00164507-01 | NIFUROXIME                                              | 0.05 | 0.00  | -4.8 | -4.8 | -4.8 |  |   |   | -41  | -45  | -52  |
| NCGC00167551-01 | CETOMACROGOL EMULSIFYING WAX                            | 0.05 | 0.00  | -4.8 | -4.8 | -4.8 |  |   |   | -87  | -79  | -107 |
| NCGC00164601-01 | Liranaftate                                             | 0.05 | -0.05 | -4.8 | -4.8 | -4.7 |  |   |   | -94  | -69  | -90  |
| NCGC00013315-01 | Buclodin                                                | 0.05 | -0.05 | -4.8 | -4.8 | -4.7 |  | A |   | -106 | -112 | -105 |
| NCGC00015442-02 | 5-Fluorouracil                                          | 0.05 | 0.20  | -4.8 | -4.8 | -5.0 |  |   | A | -93  | -98  | -95  |
| NCGC00164574-01 | Erlotinib                                               | 0.05 | 0.15  | -4.8 | -4.8 | -4.9 |  |   | A | -87  | -84  | -87  |
| NCGC00014483-01 | Pamelor                                                 | 0.10 | 0.00  | -4.8 | -4.9 | -4.8 |  |   |   | -58  | -42  | -48  |
| NCGC00160561-01 | ACIDUM BROMEBRICUM                                      | 0.10 | -0.10 | -4.8 | -4.9 | -4.7 |  |   |   | -91  | -71  | -96  |
| NCGC00160486-01 | CHLORACYZINUM                                           | 0.10 | 0.25  | -4.9 | -5.0 | -5.2 |  |   |   | -44  | -45  | -61  |
| NCGC00095194-01 | CEPHARANTHINE                                           | 0.10 | 0.20  | -4.7 | -4.8 | -4.9 |  |   |   | -121 | -109 | -101 |
| NCGC00016787-01 | Rescinnamin                                             | 0.10 | 0.15  | -5.1 | -5.2 | -5.2 |  |   |   | -50  | -67  | -56  |
| NCGC00181143-01 | FLUOROSALAN                                             | 0.10 | 0.15  | -4.7 | -4.8 | -4.9 |  |   |   | -95  | -82  | -82  |
| NCGC00015802-08 | PIMOZIDE                                                | 0.10 | 0.10  | -4.8 | -4.9 | -4.9 |  |   |   | -120 | -90  | -89  |
| NCGC00015838-03 | PROPIOMAZINE HYDROCHLORIDE                              | 0.10 | 0.10  | -4.7 | -4.8 | -4.8 |  |   |   | -37  | -37  | -56  |
| NCGC00016943-01 | Fluticasone propionate                                  | 0.10 | 0.10  | -5.1 | -5.2 | -5.2 |  |   |   | -56  | -55  | -73  |
| NCGC00016984-01 | Alclometasone dipropionate                              | 0.10 | 0.10  | -5.1 | -5.2 | -5.2 |  |   |   | -97  | -49  | -101 |
| NCGC00160599-01 | PARATHIAZINUM                                           | 0.10 | 0.05  | -4.8 | -4.9 | -4.8 |  |   |   | -104 | -91  | -92  |
| NCGC00181088-01 | MELITRACEN HYDROCHLORIDE                                | 0.10 | 0.05  | -4.8 | -4.9 | -4.8 |  |   |   | -53  | -50  | -69  |
| NCGC00016798-06 | (S)-TIMOLOL                                             | 0.10 | 0.05  | -4.7 | -4.8 | -4.8 |  |   |   | -111 | -107 | -112 |
| NCGC00095192-01 | TEGASEROD                                               | 0.10 | 0.05  | -4.7 | -4.8 | -4.8 |  |   |   | -112 | -121 | -121 |
| NCGC00159471-02 | Benzatropina                                            | 0.10 | 0.05  | -4.7 | -4.8 | -4.8 |  |   |   | -44  | -56  | -65  |
| NCGC00160483-01 | Ftormetazine                                            | 0.10 | 0.05  | -4.7 | -4.8 | -4.8 |  |   |   | -38  | -43  | -50  |
| NCGC00016511-02 | Chlorotrianisene                                        | 0.10 | 0.00  | -4.7 | -4.8 | -4.7 |  |   |   | -112 | -94  | -118 |
| NCGC00016645-01 | Methacycline hydrochloride                              | 0.10 | 0.00  | -5.1 | -5.2 | -5.1 |  |   |   | -47  | -51  | -64  |
| NCGC00094205-01 | (?)-Octoclotheptin maleate                              | 0.10 | 0.00  | -4.7 | -4.8 | -4.7 |  |   |   | -43  | -43  | -52  |
| NCGC00094372-03 | Salmeterol                                              | 0.10 | 0.00  | -4.7 | -4.8 | -4.7 |  |   |   | -95  | -93  | -94  |
| NCGC00095193-01 | CHLOROPHYLLIDE Cu COMPLEX Na SALT                       | 0.10 | 0.00  | -4.7 | -4.8 | -4.7 |  |   |   | -79  | -67  | -75  |
| NCGC00160538-01 | OCTAVERINUM                                             | 0.10 | 0.00  | -4.7 | -4.8 | -4.7 |  |   |   | -47  | -45  | -72  |
| NCGC00094897-01 | PIMETHIXENE MALEATE                                     | 0.10 | -0.05 | -4.8 | -4.9 | -4.7 |  |   |   | -123 | -98  | -104 |
| NCGC00181304-01 | IMEXON                                                  | 0.15 | 0.00  | -4.8 | -5.0 | -4.8 |  |   |   | -47  | -41  | -58  |
| NCGC00025347-01 | Medetomidine hydrochloride                              | 0.15 | -0.05 | -4.9 | -5.0 | -4.8 |  |   |   | -32  | -37  | -60  |
| NCGC00091925-01 | Cobalt sulfate heptahydrate                             | 0.15 | 0.15  | -4.9 | -5.0 | -5.0 |  | A | A | -66  | -79  | -82  |
| NCGC00015686-05 | METHOXY VERAPAMIL                                       | 0.15 | 0.15  | -4.8 | -4.9 | -4.9 |  |   |   | -48  | -41  | -37  |
| NCGC00015437-10 | Fenofibrate                                             | 0.15 | 0.10  | -4.7 | -4.9 | -4.8 |  |   |   | -44  | -53  | -66  |
| NCGC00167522-01 | HEXOPRENALINE SULFATE                                   | 0.15 | 0.10  | -4.7 | -4.9 | -4.8 |  |   |   | -68  | -74  | -82  |
| NCGC00015428-08 | FLUOXETINE                                              | 0.15 | 0.05  | -4.8 | -4.9 | -4.8 |  |   |   | -52  | -35  | -66  |
| NCGC00017100-01 | Yohimbic acid monohydrate                               | 0.15 | 0.05  | -5.1 | -5.3 | -5.2 |  |   |   | -51  | -43  | -71  |
| NCGC00016710-01 | Clemastine fumarate                                     | 0.15 | 0.05  | -4.7 | -4.8 | -4.7 |  |   |   | -39  | -47  | -46  |
| NCGC00159375-02 | P-PHENYLENEDIAMINE                                      | 0.15 | 0.05  | -4.7 | -4.9 | -4.8 |  |   |   | -105 | -100 | -114 |
| NCGC00016202-02 | Sodium nitroprusside dihydrate                          | 0.15 | 0.00  | -4.7 | -4.9 | -4.7 |  |   |   | -70  | -66  | -102 |
| NCGC00016563-01 | Meclozine dihydrochloride                               | 0.15 | 0.00  | -5.1 | -5.2 | -5.1 |  |   |   | -92  | -91  | -96  |
| NCGC00024846-03 | GUANABENZ                                               | 0.15 | 0.00  | -4.8 | -4.9 | -4.8 |  |   |   | -62  | -50  | -72  |
| NCGC00094891-01 | FENDILINE HYDROCHLORIDE                                 | 0.15 | 0.00  | -4.7 | -4.9 | -4.7 |  |   |   | -88  | -96  | -102 |
| NCGC00164565-01 | Zaprasidone                                             | 0.15 | 0.00  | -4.7 | -4.9 | -4.7 |  |   |   | -77  | -66  | -88  |
| NCGC00181010-01 | MABUTEROL HYDROCHLORIDE                                 | 0.15 | 0.00  | -4.7 | -4.9 | -4.7 |  |   |   | -97  | -85  | -99  |

|                  |                                                                        |       |       |      |      |      |  |   |   |      |      |      |
|------------------|------------------------------------------------------------------------|-------|-------|------|------|------|--|---|---|------|------|------|
| NCGC00015851-02  | Protriptyline hydrochloride                                            | 0.15  | -0.05 | -5.1 | -5.3 | -5.1 |  |   |   | -45  | -36  | -49  |
| NCGC00015713-07  | NITRENDIPINE                                                           | 0.15  | 0.15  | -4.7 | -4.9 | -4.9 |  |   |   | -39  | -38  | -49  |
| NCGC000095163-01 | SARAFLOXACIN HYDROCHLORIDE                                             | 0.15  | 0.15  | -4.8 | -4.9 | -4.9 |  |   |   | -46  | -58  | -67  |
| NCGC00017257-09  | METERGOLINE PHENYLMETHYL ESTER                                         | 0.15  | 0.30  | -4.9 | -5.1 | -5.2 |  |   |   | -61  | -49  | -58  |
| NCGC00016898-01  | Sulconazole nitrate                                                    | 0.15  | 0.15  | -5.1 | -5.2 | -5.2 |  |   | A | -112 | -102 | -112 |
| NCGC00163778-02  | Imazail sulphate                                                       | 0.15  | 0.10  | -4.8 | -4.9 | -4.9 |  | A | A | -125 | -111 | -126 |
| NCGC000096003-01 | TILMICOSIN                                                             | 0.20  | 0.25  | -4.8 | -5.0 | -5.1 |  |   |   | -49  | -50  | -51  |
| NCGC00016621-01  | Halcinonide                                                            | 0.20  | 0.20  | -5.1 | -5.3 | -5.3 |  |   |   | -98  | -89  | -92  |
| NCGC000091505-01 | Nitrofurantoin                                                         | 0.20  | 0.05  | -4.7 | -4.9 | -4.8 |  |   |   | -100 | -86  | -106 |
| NCGC00167509-01  | PIPETHANATE ETHOBROMIDE                                                | 0.20  | 0.05  | -4.7 | -4.9 | -4.8 |  |   |   | -44  | -43  | -73  |
| NCGC00015708-04  | MAPROTILINE                                                            | 0.20  | 0.00  | -4.7 | -4.9 | -4.7 |  |   |   | -45  | -33  | -43  |
| NCGC00167467-01  | VECURONIUM BROMIDE                                                     | 0.20  | 0.10  | -4.9 | -5.1 | -5.0 |  |   |   | -46  | -51  | -69  |
| NCGC00167585-01  | IPIDACRINE HYDROCHLORIDE HYDRATE                                       | 0.20  | 0.30  | -4.7 | -4.9 | -5.0 |  |   | A | -116 | -100 | -109 |
| NCGC000095166-01 | CLOPIDOL                                                               | 0.20  | 0.25  | -4.8 | -5.0 | -5.0 |  |   | A | -61  | -46  | -75  |
| NCGC00016692-01  | Bromperidol                                                            | 0.20  | 0.15  | -5.1 | -5.3 | -5.2 |  |   | A | -63  | -51  | -72  |
| NCGC00018254-03  | BIFONAZOLE                                                             | 0.20  | 0.20  | -4.7 | -4.9 | -4.9 |  | A | A | -116 | -116 | -114 |
| NCGC00164567-01  | PEROSPIRONE HYDROCHLORIDE HYDRATE                                      | 0.25  | -0.05 | -4.8 | -5.1 | -4.8 |  |   |   | -63  | -34  | -56  |
| NCGC00165810-01  | INDORAMIN HYDROCHLORIDE                                                | 0.25  | -0.05 | -4.8 | -5.0 | -4.7 |  |   | A | -64  | -68  | -71  |
| NCGC00167433-01  | ROCURONIUM BROMIDE                                                     | 0.25  | 0.30  | -5.0 | -5.3 | -5.3 |  |   | A | -61  | -59  | -65  |
| NCGC00159466-02  | alprazolam                                                             | 0.35  | -0.10 | -4.9 | -5.2 | -4.8 |  | A |   | -105 | -77  | -93  |
| NCGC00015089-08  | AMILORIDE                                                              | 0.35  | 0.00  | -4.8 | -5.2 | -4.8 |  | A | A | -105 | -70  | -119 |
| NCGC00160398-01  | NAFAMOSTAT MESILATE                                                    | 0.35  | 0.35  | -4.8 | -5.1 | -5.1 |  |   | A | -60  | -48  | -64  |
| NCGC00167821-01  | CABERGOLINE                                                            | 0.20  | -4.7  | -4.7 | -4.9 | -4.9 |  | N |   | -41  | -24  | -34  |
| NCGC00163150-01  | CLENBUTEROL                                                            | 0.20  | -4.7  | -4.7 | -4.9 | -4.9 |  | N |   | -37  | -27  | -46  |
| NCGC00163157-01  | MESORIDAZINE                                                           | 0.15  | -4.8  | -4.8 | -4.9 | -4.9 |  | N |   | -37  | -38  | -40  |
| NCGC00166250-01  | ANAZOLENUM NATRICUM                                                    | 0.15  | -4.7  | -4.7 | -4.9 | -4.9 |  | N |   | -43  | -36  | -58  |
| NCGC00016495-01  | Hexylcaine hydrochloride                                               | 0.10  | -5.1  | -5.1 | -5.2 | -5.2 |  | N |   | -92  | -14  | -97  |
| NCGC00015872-05  | QUIPAZINE                                                              | 0.10  | -4.7  | -4.7 | -4.8 | -4.8 |  | N |   | -78  | 19   | -91  |
| NCGC00160601-01  | Anilamate                                                              | 0.05  | -4.7  | -4.7 | -4.8 | -4.8 |  | N |   | -46  | -30  | -65  |
| NCGC000090704-01 | Indium trichloride                                                     | 0.00  | -4.7  | -4.7 | -4.7 | -4.7 |  | N |   | -77  | -24  | -94  |
| NCGC000095117-01 | CLARITHROMYCIN                                                         | 0.00  | -4.8  | -4.8 | -4.8 | -4.8 |  | N |   | -105 | -8   | -58  |
| NCGC00013015-01  | GLUCONIC ACID, BARIUM SALT                                             | 0.00  | -4.7  | -4.7 | -4.7 | -4.7 |  | N |   | -78  | -29  | -99  |
| NCGC00015273-11  | CHLORPROMAZINE                                                         | 0.00  | -4.7  | -4.7 | -4.7 | -4.7 |  | N |   | -49  | -27  | -43  |
| NCGC00015619-09  | LORATADINE                                                             | 0.00  | -4.7  | -4.7 | -4.7 | -4.7 |  | N |   | -47  | -31  | -36  |
| NCGC00016909-01  | Glafenine hydrochloride                                                | 0.00  | -5.1  | -5.1 | -5.1 | -5.1 |  | N |   | -42  | -26  | -35  |
| NCGC00024665-03  | METHIOTHEPIN                                                           | 0.00  | -4.7  | -4.7 | -4.7 | -4.7 |  | N |   | -40  | -32  | -57  |
| NCGC000092362-01 | ECOPIPAMUM                                                             | 0.00  | -4.7  | -4.7 | -4.7 | -4.7 |  | N |   | -44  | -33  | -55  |
| NCGC000092386-03 | Sertraline hydrochloride (Zoloft)                                      | 0.00  | -4.7  | -4.7 | -4.7 | -4.7 |  | N |   | -48  | -25  | -36  |
| NCGC000094400-01 | R(-)-SCH-12679 maleate                                                 | 0.00  | -4.7  | -4.7 | -4.7 | -4.7 |  | N |   | -35  | -32  | -47  |
| NCGC000095005-01 | BROMHEXINE HYDROCHLORIDE                                               | 0.00  | -4.7  | -4.7 | -4.7 | -4.7 |  | N |   | -44  | -34  | -50  |
| NCGC000095289-01 | EXEMESTANE                                                             | 0.00  | -4.7  | -4.7 | -4.7 | -4.7 |  | N |   | -41  | -19  | -44  |
| NCGC00024740-02  | ANPIRTOLINE                                                            | -0.05 | -4.8  | -4.8 | -4.7 | -4.7 |  | N |   | -125 | -6   | -71  |
| NCGC000091865-01 | Benzyl alcohol                                                         | -0.05 | -4.8  | -4.8 | -4.7 | -4.7 |  | N |   | -65  | -8   | -103 |
| NCGC00164547-01  | Zafirlukast                                                            | -0.05 | -4.8  | -4.8 | -4.7 | -4.7 |  | N |   | -47  | -28  | -36  |
| NCGC00165953-02  | (E)-2-[2-Fluoro-2-(quinuclidin-3-ylidene)ethoxy]-9H-carbazole monohydr | -0.10 | -4.8  | -4.8 | -4.7 | -4.7 |  | N |   | -63  | -32  | -60  |
| NCGC00017040-01  | Thiopropazine dimesylate                                               | -0.15 | -5.2  | -5.2 | -5.1 | -5.1 |  | N |   | -48  | -26  | -86  |
| NCGC00167536-01  | TOSUFLOXACIN TOSILATE                                                  | 0.10  | -5.2  | -5.2 | -5.3 | -5.3 |  | N |   | -38  | -32  | -41  |
| NCGC00181101-01  | ISOTHIPENDYL HYDROCHLORIDE                                             | -0.10 | -5.1  | -5.1 | -5.0 | -5.0 |  | N |   | -37  | -33  | -49  |
| NCGC00014670-01  | Floxacinil Na salt                                                     |       | -4.9  | -4.9 |      |      |  |   | N | -108 | -117 | -46  |
| NCGC000091512-04 | CINNAMALDEHYDE                                                         |       |       |      | -4.5 |      |  | N | N | -86  |      | -94  |
| NCGC00167476-01  | CALCIUM HOPANTENATE                                                    |       |       |      |      |      |  | N | N | -76  | -42  | -55  |
| NCGC00015822-09  | MEPYRAMINE                                                             | -0.28 | -4.8  | -4.8 | -4.5 | -4.5 |  | N | N | -61  | -93  |      |
| NCGC00021146-06  | KETANSERIN                                                             |       | -4.9  | -4.9 |      |      |  | N | N | -42  | -18  | -27  |
| NCGC00164582-01  | Feprazone                                                              |       | -4.8  | -4.8 |      |      |  | N | N | -46  | -28  | -34  |
| NCGC00167449-01  | DESOGESTREL                                                            |       | -4.7  | -4.7 |      |      |  | N | N | -37  | -27  | -24  |
| NCGC00018130-04  | Fenazopiridina                                                         |       | -4.8  | -4.8 |      |      |  | N | N | -39  | -3   | -4   |
| NCGC00025273-01  | Nemonapride                                                            |       |       |      |      |      |  | N | N | -70  | -6   | -8   |
| NCGC00160476-01  | FLUACIZINUM                                                            |       |       |      | -4.5 |      |  | N | N | -64  | -15  |      |
| NCGC00160539-01  | Adefovir                                                               |       | -5.7  | -5.7 |      |      |  | N | N | -43  | 21   | 9    |
| NCGC00167979-01  | METENOLONE ENANTHATE                                                   |       | -4.7  | -4.7 |      |      |  | N | N | -118 | -6   | -5   |
| NCGC00021274-03  | ESTRADIOL BENZOATE                                                     |       | -4.8  | -4.8 |      |      |  | N | N | -43  | -20  | -31  |
| NCGC000095066-01 | SELAMECTIN                                                             |       | -4.7  | -4.7 |      |      |  | N | N | -46  | -16  | -21  |
| NCGC000095086-01 | PERICIAZINE                                                            |       | -4.7  | -4.7 |      |      |  | N | N | -48  | -20  | -31  |
| NCGC000095136-01 | OLMESARTAN MEDOXOMIL                                                   |       | -4.7  | -4.7 |      |      |  | N | N | -35  | 3    | -38  |

|                 |                                                                   |      |  |      |      |   |   |   |     |     |     |
|-----------------|-------------------------------------------------------------------|------|--|------|------|---|---|---|-----|-----|-----|
| NCGC00160462-01 | Guanoxano                                                         |      |  | -5.3 |      | I | N | N | -50 | -29 | -31 |
| NCGC00013235-01 | Estradiol phosphate                                               | 0.00 |  | -4.5 | -4.5 | N | N | N |     |     | 7   |
| NCGC00013723-01 | AMINOXYSCOPOLAMINE HYDROBROMIDE                                   | 0.00 |  | -4.5 | -4.5 | N | N | N |     |     | 5   |
| NCGC00014313-01 | Capicillin                                                        | 0.00 |  | -4.5 | -4.5 | N | N | N |     |     | -1  |
| NCGC00015042-03 | N-ARACHIDONYLGLYCINE                                              | 0.00 |  | -4.5 | -4.5 | N | N | N |     |     | 6   |
| NCGC00015268-05 | CLONIDINE                                                         | 0.00 |  | -4.5 | -4.5 | N | N | N |     |     | -7  |
| NCGC00015400-02 | Enoximone                                                         | 0.00 |  | -4.5 | -4.5 | N | N | N |     |     | 0   |
| NCGC00015416-02 | Ethylene glycol-bis(2-aminoethylether)-N,N,N',N'-tetraacetic acid | 0.00 |  | -4.5 | -4.5 | N | N | N |     |     | 3   |
| NCGC00015441-04 | Fusaric acid                                                      | 0.00 |  | -4.5 | -4.5 | N | N | N |     |     | -7  |
| NCGC00015594-02 | Ioxoprofen                                                        | 0.00 |  | -4.5 | -4.5 | N | N | N |     |     | 5   |
| NCGC00015605-06 | Lamotrigine                                                       | 0.00 |  | -4.5 | -4.5 | N | N | N |     |     | 2   |
| NCGC00015615-02 | Lansoprazole                                                      | 0.00 |  | -4.5 | -4.5 | N | N | N |     |     | 3   |
| NCGC00015643-07 | METOCLOPRAMIDE                                                    | 0.00 |  | -4.5 | -4.5 | N | N | N |     |     | 8   |
| NCGC00015647-05 | Nocodazole                                                        | 0.00 |  | -4.5 | -4.5 | N | N | N |     |     | 7   |
| NCGC00015919-04 | SOTALOL                                                           | 0.00 |  | -4.5 | -4.5 | N | N | N |     |     | -1  |
| NCGC00016009-10 | TOLAZAMIDE                                                        | 0.00 |  | -4.5 | -4.5 | N | N | N |     |     | 6   |
| NCGC00016230-01 | Homatropine hydrobromide (R,S)                                    | 0.00 |  | -4.5 | -4.5 | N | N | N |     |     | 9   |
| NCGC00016304-01 | Norethynodrel                                                     | 0.00 |  | -4.5 | -4.5 | N | N | N |     |     | -2  |
| NCGC00016305-01 | Sulfadiazine                                                      | 0.00 |  | -4.5 | -4.5 | N | N | N |     |     | 7   |
| NCGC00016313-01 | Quinethazone                                                      | 0.00 |  | -4.5 | -4.5 | N | N | N |     |     | -3  |
| NCGC00016329-01 | Phenindione                                                       | 0.00 |  | -4.5 | -4.5 | N | N | N |     |     | 7   |
| NCGC00016344-03 | Mesalamine                                                        | 0.00 |  | -4.5 | -4.5 | N | N | N |     |     | 0   |
| NCGC00016347-01 | Benzthiazide                                                      | 0.00 |  | -4.5 | -4.5 | N | N | N |     |     | -1  |
| NCGC00016393-01 | Dioxybenzone                                                      | 0.00 |  | -4.5 | -4.5 | N | N | N |     |     | 3   |
| NCGC00016404-01 | Hexetidine                                                        | 0.00 |  | -4.5 | -4.5 | N | N | N |     |     | -15 |
| NCGC00016496-01 | Etilefrine hydrochloride                                          | 0.00 |  | -4.5 | -4.5 | N | N | N |     |     | 3   |
| NCGC00016508-01 | Methazolamide                                                     | 0.00 |  | -4.5 | -4.5 | N | N | N |     |     | 13  |
| NCGC00016512-01 | Isoxsuprine hydrochloride                                         | 0.00 |  | -4.5 | -4.5 | N | N | N |     |     | -4  |
| NCGC00016552-01 | Cephalosporanic acid, 7-amino                                     | 0.00 |  | -4.5 | -4.5 | N | N | N |     |     | 5   |
| NCGC00016754-01 | Spectinomycin dihydrochloride                                     | 0.00 |  | -4.5 | -4.5 | N | N | N |     |     | -2  |
| NCGC00016757-01 | Ketoprofen                                                        | 0.00 |  | -4.5 | -4.5 | N | N | N |     |     | -1  |
| NCGC00016764-01 | Benfotiamine                                                      | 0.00 |  | -4.5 | -4.5 | N | N | N |     |     | 4   |
| NCGC00016765-01 | Diflunisal                                                        | 0.00 |  | -4.5 | -4.5 | N | N | N |     |     | -5  |
| NCGC00016792-01 | Kanamycin A sulfate                                               | 0.00 |  | -4.5 | -4.5 | N | N | N |     |     | 1   |
| NCGC00016806-01 | Mebendazole                                                       | 0.00 |  | -4.5 | -4.5 | N | N | N |     |     | 7   |
| NCGC00016853-01 | Nabumetone                                                        | 0.00 |  | -4.5 | -4.5 | N | N | N |     |     | -4  |
| NCGC00016858-01 | Cefadroxil                                                        | 0.00 |  | -4.5 | -4.5 | N | N | N |     |     | 3   |
| NCGC00016869-01 | Sisomicin sulfate                                                 | 0.00 |  | -4.5 | -4.5 | N | N | N |     |     | 4   |
| NCGC00016937-01 | Ozagrel hydrochloride                                             | 0.00 |  | -4.5 | -4.5 | N | N | N |     |     | -1  |
| NCGC00016938-01 | Cefixime                                                          | 0.00 |  | -4.5 | -4.5 | N | N | N |     |     | 8   |
| NCGC00016940-01 | Simvastatin                                                       | 0.00 |  | -4.5 | -4.5 | N | N | N |     |     | 1   |
| NCGC00016942-01 | Roxithromycin                                                     | 0.00 |  | -4.5 | -4.5 | N | N | N |     |     | -1  |
| NCGC00016960-03 | Glimepiride                                                       | 0.00 |  | -4.5 | -4.5 | N | N | N |     |     | 1   |
| NCGC00016982-01 | Nafronyl oxalate                                                  | 0.00 |  | -4.5 | -4.5 | N | N | N |     |     | -1  |
| NCGC00016985-01 | Disopyramide                                                      | 0.00 |  | -4.5 | -4.5 | N | N | N |     |     | 0   |
| NCGC00017020-01 | Amprolium hydrochloride                                           | 0.00 |  | -4.5 | -4.5 | N | N | N |     |     | 8   |
| NCGC00017046-01 | Ticarcillin sodium                                                | 0.00 |  | -4.5 | -4.5 | N | N | N |     |     | 6   |
| NCGC00017055-01 | Folinic acid calcium salt                                         | 0.00 |  | -4.5 | -4.5 | N | N | N |     |     | 3   |
| NCGC00017059-01 | Mebhydroline 1,5-naphtalenedisulfonate                            | 0.00 |  | -4.5 | -4.5 | N | N | N |     |     | 4   |
| NCGC00017070-01 | Nafcillin sodium salt monohydrate                                 | 0.00 |  | -4.5 | -4.5 | N | N | N |     |     | 3   |
| NCGC00017113-01 | Flunixin meglumine                                                | 0.00 |  | -4.5 | -4.5 | N | N | N |     |     | -1  |
| NCGC00017120-01 | Cefmetazole sodium salt                                           | 0.00 |  | -4.5 | -4.5 | N | N | N |     |     | 2   |
| NCGC00017130-01 | Moxalactam disodium salt                                          | 0.00 |  | -4.5 | -4.5 | N | N | N |     |     | 2   |
| NCGC00017137-01 | Ceftazidime pentahydrate                                          | 0.00 |  | -4.5 | -4.5 | N | N | N |     |     | -9  |
| NCGC00017260-05 | RAUWOLSCINE                                                       | 0.00 |  | -4.5 | -4.5 | N | N | N |     |     | -3  |
| NCGC00018242-04 | Sulfacetamide                                                     | 0.00 |  | -4.5 | -4.5 | N | N | N |     |     | 2   |
| NCGC00021569-04 | Enalapril                                                         | 0.00 |  | -4.5 | -4.5 | N | N | N |     |     | 1   |
| NCGC00024703-02 | TROPANYL 3,5-DIMETHYLBENZOATE                                     | 0.00 |  | -4.5 | -4.5 | N | N | N |     |     | 5   |
| NCGC00025236-01 | Remacemide hydrochloride                                          | 0.00 |  | -4.5 | -4.5 | N | N | N |     |     | 9   |
| NCGC00025346-02 | Mirtazapine                                                       | 0.00 |  | -4.5 | -4.5 | N | N | N |     |     | -7  |
| NCGC00074022-02 | PYRIDINOL CARBAMATE                                               | 0.00 |  | -4.5 | -4.5 | N | N | N |     |     | 3   |
| NCGC00077304-01 | FLUANISONUM                                                       | 0.00 |  | -4.5 | -4.5 | N | N | N |     |     | -11 |
| NCGC00090682-01 | alpha-Pinene                                                      | 0.00 |  | -4.5 | -4.5 | N | N | N |     |     | 5   |
| NCGC00090698-02 | 1,3-Diphenylguanidine                                             | 0.00 |  | -4.5 | -4.5 | N | N | N |     |     | 0   |

|                 |                                             |      |      |      |   |   |   |     |
|-----------------|---------------------------------------------|------|------|------|---|---|---|-----|
| NCGC00090729-01 | Acesulfame K                                | 0.00 | -4.5 | -4.5 | N | N | N | 11  |
| NCGC00090851-04 | Azacitidine                                 | 0.00 | -4.5 | -4.5 | N | N | N | 7   |
| NCGC00091013-01 | 5alpha-Androstan-17beta-ol-3-one            | 0.00 | -4.5 | -4.5 | N | N | N | 3   |
| NCGC00091034-02 | Captan                                      | 0.00 | -4.5 | -4.5 | N | N | N | 5   |
| NCGC00091059-01 | n-Butyl chloride                            | 0.00 | -4.5 | -4.5 | N | N | N | 7   |
| NCGC00091175-01 | o-Anthranilic acid                          | 0.00 | -4.5 | -4.5 | N | N | N | -1  |
| NCGC00091352-02 | ENDRIN                                      | 0.00 | -4.5 | -4.5 | N | N | N | -10 |
| NCGC00091398-02 | Nitrobenzene                                | 0.00 | -4.5 | -4.5 | N | N | N | 6   |
| NCGC00091493-01 | Anethole                                    | 0.00 | -4.5 | -4.5 | N | N | N | -2  |
| NCGC00091544-04 | POLYESTRADIOL PHOSPHATE                     | 0.00 | -4.5 | -4.5 | N | N | N | 4   |
| NCGC00091737-01 | Sorbic acid                                 | 0.00 | -4.5 | -4.5 | N | N | N | 0   |
| NCGC00091792-01 | 1,2-Epoxy-3-chloropropane (Epichlorohydrin) | 0.00 | -4.5 | -4.5 | N | N | N | 5   |
| NCGC00092300-01 | CINALUKASTUM                                | 0.00 | -4.5 | -4.5 | N | N | N | -12 |
| NCGC00092361-05 | DINOPROSTONE                                | 0.00 | -4.5 | -4.5 | N | N | N | 2   |
| NCGC00093534-02 | ACECAINIDE HYDROCHLORIDE                    | 0.00 | -4.5 | -4.5 | N | N | N | 6   |
| NCGC00094157-01 | CR 2249                                     | 0.00 | -4.5 | -4.5 | N | N | N | 9   |
| NCGC00094546-04 | LINDANE                                     | 0.00 | -4.5 | -4.5 | N | N | N | 14  |
| NCGC00094707-01 | LACTULOSE                                   | 0.00 | -4.5 | -4.5 | N | N | N | -3  |
| NCGC00094799-01 | TRIAMCINOLONE                               | 0.00 | -4.5 | -4.5 | N | N | N | 5   |
| NCGC00094882-01 | DROFENINE HYDROCHLORIDE                     | 0.00 | -4.5 | -4.5 | N | N | N | -8  |
| NCGC00095054-01 | RESORCINOL MONOACETATE                      | 0.00 | -4.5 | -4.5 | N | N | N | -1  |
| NCGC00095147-01 | TROXERUTIN                                  | 0.00 | -4.5 | -4.5 | N | N | N | -1  |
| NCGC00095160-01 | ASPARTAME                                   | 0.00 | -4.5 | -4.5 | N | N | N | 8   |
| NCGC00095183-01 | PRAVASTATIN SODIUM                          | 0.00 | -4.5 | -4.5 | N | N | N | 5   |
| NCGC00095233-01 | HYDROXYAMPHETAMINE HYDROBROMIDE             | 0.00 | -4.5 | -4.5 | N | N | N | 4   |
| NCGC00095239-01 | 1,3,5-TRIMETHOXYBENZENE                     | 0.00 | -4.5 | -4.5 | N | N | N | 10  |
| NCGC00095254-04 | TOCOPHEROL ACETATE                          | 0.00 | -4.5 | -4.5 | N | N | N | 0   |
| NCGC00095935-01 | CORTISONE                                   | 0.00 | -4.5 | -4.5 | N | N | N | 2   |
| NCGC00096059-01 | TRIMEBUTINE MALEATE                         | 0.00 | -4.5 | -4.5 | N | N | N | 1   |
| NCGC00159323-02 | Oxazepam                                    | 0.00 | -4.5 | -4.5 | N | N | N | 3   |
| NCGC00159337-02 | EFAVIRENZ                                   | 0.00 | -4.5 | -4.5 | N | N | N | 0   |
| NCGC00159364-02 | CI DIRECT RED 28                            | 0.00 | -4.5 | -4.5 | N | N | N | -2  |
| NCGC00159414-02 | Terpinol                                    | 0.00 | -4.5 | -4.5 | N | N | N | 4   |
| NCGC00159438-02 | SELENOMETHIONINE, SE-75                     | 0.00 | -4.5 | -4.5 | N | N | N | -1  |
| NCGC00159479-02 | METHYL NICOTINATE                           | 0.00 | -4.5 | -4.5 | N | N | N | -3  |
| NCGC00159480-02 | Cetamina                                    | 0.00 | -4.5 | -4.5 | N | N | N | 6   |
| NCGC00160264-01 | 6,7-DIMETHOXYQUINAZOLINE-2,4(1H,3H)-DIONE   | 0.00 | -4.5 | -4.5 | N | N | N | 7   |
| NCGC00160350-01 | LINOTROBANUM                                | 0.00 | -4.5 | -4.5 | N | N | N | 8   |
| NCGC00160394-01 | MEPHENYTOIN                                 | 0.00 | -4.5 | -4.5 | N | N | N | 9   |
| NCGC00160405-01 | Acide risedronique                          | 0.00 | -4.5 | -4.5 | N | N | N | 9   |
| NCGC00160440-01 | Lonazolac                                   | 0.00 | -4.5 | -4.5 | N | N | N | -9  |
| NCGC00160475-01 | Norletimol                                  | 0.00 | -4.5 | -4.5 | N | N | N | 3   |
| NCGC00160496-01 | Amanozine                                   | 0.00 | -4.5 | -4.5 | N | N | N | -1  |
| NCGC00160528-01 | NUCLOMEDONUM                                | 0.00 | -4.5 | -4.5 | N | N | N | 4   |
| NCGC00160543-01 | Pregnandiol                                 | 0.00 | -4.5 | -4.5 | N | N | N | -4  |
| NCGC00160606-01 | Sulbentina                                  | 0.00 | -4.5 | -4.5 | N | N | N | -4  |
| NCGC00160608-01 | ROLICYPRINUM                                | 0.00 | -4.5 | -4.5 | N | N | N | 5   |
| NCGC00160644-01 | PICOLINE, ALPHA                             | 0.00 | -4.5 | -4.5 | N | N | N | 8   |
| NCGC00160647-01 | CYPROMID                                    | 0.00 | -4.5 | -4.5 | N | N | N | 10  |
| NCGC00160658-01 | Adafenoxate                                 | 0.00 | -4.5 | -4.5 | N | N | N | 8   |
| NCGC00161344-03 | EICOSAPENTAENOIC ACID                       | 0.00 | -4.5 | -4.5 | N | N | N | 2   |
| NCGC00162274-02 | NALTREXONE                                  | 0.00 | -4.5 | -4.5 | N | N | N | 3   |
| NCGC00163127-02 | ACITRETIN                                   | 0.00 | -4.5 | -4.5 | N | N | N | 1   |
| NCGC00163160-01 | B-HT 920                                    | 0.00 | -4.5 | -4.5 | N | N | N | 5   |
| NCGC00163242-01 | (+)-TUBOCURARINE                            | 0.00 | -4.5 | -4.5 | N | N | N | 4   |
| NCGC00163256-01 | TIOTIDINE                                   | 0.00 | -4.5 | -4.5 | N | N | N | 16  |
| NCGC00163798-03 | TRIETHYLENE GLYCOL                          | 0.00 | -4.5 | -4.5 | N | N | N | 9   |
| NCGC00164140-03 |                                             | 0.00 | -4.5 | -4.5 | N | N | N | -5  |
| NCGC00164265-01 | Olaquinoxã                                  | 0.00 | -4.5 | -4.5 | N | N | N | 2   |
| NCGC00164333-01 | Sorbitan monostearate                       | 0.00 | -4.5 | -4.5 | N | N | N | 2   |
| NCGC00164447-01 | Ciprofibrate                                | 0.00 | -4.5 | -4.5 | N | N | N | 3   |
| NCGC00164465-01 | Imiprothrin                                 | 0.00 | -4.5 | -4.5 | N | N | N | 10  |
| NCGC00164498-01 | TOLPENTAMIDUM                               | 0.00 | -4.5 | -4.5 | N | N | N | 2   |
| NCGC00164532-01 | Parapropamol                                | 0.00 | -4.5 | -4.5 | N | N | N | 3   |

|                 |                                                      |      |      |      |   |   |   |     |
|-----------------|------------------------------------------------------|------|------|------|---|---|---|-----|
| NCGC00164541-01 | SULFACARBAMIDUM                                      | 0.00 | -4.5 | -4.5 | N | N | N | -6  |
| NCGC00164560-01 | ABACAVIR SULFATE                                     | 0.00 | -4.5 | -4.5 | N | N | N | -3  |
| NCGC00164577-01 | nimetazepam                                          | 0.00 | -4.5 | -4.5 | N | N | N | -8  |
| NCGC00164588-01 | malotilate                                           | 0.00 | -4.5 | -4.5 | N | N | N | 5   |
| NCGC00165997-01 | Bismuth subcarbonate                                 | 0.00 | -4.5 | -4.5 | N | N | N | 9   |
| NCGC00166021-01 | SODIUM HEXAFLUOROSILICATE                            | 0.00 | -4.5 | -4.5 | N | N | N | -3  |
| NCGC00166077-01 | Bitoscanate                                          | 0.00 | -4.5 | -4.5 | N | N | N | 2   |
| NCGC00166097-01 | Cinnamyl alcohol                                     | 0.00 | -4.5 | -4.5 | N | N | N | 9   |
| NCGC00166206-01 | PHTHARAL                                             | 0.00 | -4.5 | -4.5 | N | N | N | -1  |
| NCGC00166259-01 | Etocrylene                                           | 0.00 | -4.5 | -4.5 | N | N | N | 5   |
| NCGC00166295-01 | Lactitol                                             | 0.00 | -4.5 | -4.5 | N | N | N | 7   |
| NCGC00166305-01 | PERACETIC ACID                                       | 0.00 | -4.5 | -4.5 | N | N | N | 1   |
| NCGC00166321-01 | FOSFRUCTOSUM                                         | 0.00 | -4.5 | -4.5 | N | N | N | 3   |
| NCGC00166329-01 | sn-Glycerol 3-phosphate bis(cyclohexylammonium) salt | 0.00 | -4.5 | -4.5 | N | N | N | 2   |
| NCGC00167447-01 | PROSULTIAMINE                                        | 0.00 | -4.5 | -4.5 | N | N | N | -8  |
| NCGC00167459-01 | DOXAPRAM HYDROCHLORIDE                               | 0.00 | -4.5 | -4.5 | N | N | N | -4  |
| NCGC00167480-01 | N-HYDROXYMETHYLSUCCINIMIDE                           | 0.00 | -4.5 | -4.5 | N | N | N | 5   |
| NCGC00167507-01 | LAPATINIB TOSILATE HYDRATE                           | 0.00 | -4.5 | -4.5 | N | N | N | 5   |
| NCGC00167558-01 | FLEROXACIN                                           | 0.00 | -4.5 | -4.5 | N | N | N | -3  |
| NCGC00167564-01 | PAMABROM                                             | 0.00 | -4.5 | -4.5 | N | N | N | 1   |
| NCGC00167575-01 | ANAGRELIDE HYDROCHLORIDE                             | 0.00 | -4.5 | -4.5 | N | N | N | -3  |
| NCGC00167578-01 | MITIGLINIDE CALCIUM HYDRATE                          | 0.00 | -4.5 | -4.5 | N | N | N | 4   |
| NCGC00167580-01 | COENZYME A                                           | 0.00 | -4.5 | -4.5 | N | N | N | 2   |
| NCGC00167754-01 | TALNIFLUMATUM                                        | 0.00 | -4.5 | -4.5 | N | N | N | 4   |
| NCGC00168773-01 | DARUNAVIR ETHANOLATE                                 | 0.00 | -4.5 | -4.5 | N | N | N | -2  |
| NCGC00181033-01 | TALTIRELIN HYDRATE                                   | 0.00 | -4.5 | -4.5 | N | N | N | 11  |
| NCGC00181045-01 | PYRIDOXAMINE PHOSPHATE                               | 0.00 | -4.5 | -4.5 | N | N | N | -3  |
| NCGC00181090-01 | P-HYDROXYEPHEDRINE HYDROCHLORIDE                     | 0.00 | -4.5 | -4.5 | N | N | N | 4   |
| NCGC00181167-01 | ISONIAZID SODIUM METHANESULFONATE                    | 0.00 | -4.5 | -4.5 | N | N | N | -7  |
| NCGC00181311-01 | ADEMETIONINE                                         | 0.00 | -4.5 | -4.5 | N | N | N | 1   |
| NCGC00181337-01 | DICHLOROBENZYL ALCOHOL                               | 0.00 | -4.5 | -4.5 | N | N | N | -1  |
| NCGC00181340-01 | AZOSEMIDE                                            | 0.00 | -4.5 | -4.5 | N | N | N | -2  |
| NCGC00181352-01 | ASPOXCILLIN                                          | 0.00 | -4.5 | -4.5 | N | N | N | 7   |
| NCGC00015073-02 | Amifostine                                           | 0.00 | -4.5 | -4.5 | N | N | N | 10  |
| NCGC00015590-03 | Linopirdine dihydrochloride                          | 0.00 | -4.5 | -4.5 | N | N | N | -12 |
| NCGC00015716-05 | NYLIDRIN                                             | 0.00 | -4.5 | -4.5 | N | N | N | -12 |
| NCGC00016160-02 | Loxapine succinate                                   | 0.00 | -4.5 | -4.5 | N | N | N | 0   |
| NCGC00016564-01 | Metformin hydrochloride                              | 0.00 | -4.5 | -4.5 | N | N | N | 5   |
| NCGC00016598-01 | Tranlycypromine hydrochloride                        | 0.00 | -4.5 | -4.5 | N | N | N | 14  |
| NCGC00016605-01 | Nifenazone                                           | 0.00 | -4.5 | -4.5 | N | N | N | 11  |
| NCGC00016956-01 | loversol                                             | 0.00 | -4.5 | -4.5 | N | N | N | 11  |
| NCGC00016998-01 | Cefotiam hydrochloride                               | 0.00 | -4.5 | -4.5 | N | N | N | -15 |
| NCGC00021151-02 | Xanthinol niacinate                                  | 0.00 | -4.5 | -4.5 | N | N | N | 13  |
| NCGC00024359-04 | PENICILLAMINE                                        | 0.00 | -4.5 | -4.5 | N | N | N | 10  |
| NCGC00091012-01 | Triton X-100                                         | 0.00 | -4.5 | -4.5 | N | N | N | -12 |
| NCGC00091501-01 | Resorcinol                                           | 0.00 | -4.5 | -4.5 | N | N | N | -1  |
| NCGC00093350-02 | Amikacin sulfate                                     | 0.00 | -4.5 | -4.5 | N | N | N | -7  |
| NCGC00094614-03 | Chloroxylenol                                        | 0.00 | -4.5 | -4.5 | N | N | N | -23 |
| NCGC00094630-01 | COLISTIMETHATE SODIUM                                | 0.00 | -4.5 | -4.5 | N | N | N | -11 |
| NCGC00094763-01 | POLYMYXIN B SULFATE                                  | 0.00 | -4.5 | -4.5 | N | N | N | 10  |
| NCGC00095003-01 | TIOXOLONE                                            | 0.00 | -4.5 | -4.5 | N | N | N | 8   |
| NCGC00159339-02 | Streptomycin sulfate                                 | 0.00 | -4.5 | -4.5 | N | N | N | -27 |
| NCGC00159351-02 | CHOLESTEROL                                          | 0.00 | -4.5 | -4.5 | N | N | N | 8   |
| NCGC00159357-02 | Mephobarbital                                        | 0.00 | -4.5 | -4.5 | N | N | N | -20 |
| NCGC00160374-01 | TRIMETHIDINII METHOSULFAS                            | 0.00 | -4.5 | -4.5 | N | N | N | 0   |
| NCGC00160453-01 | Morinamida                                           | 0.00 | -4.5 | -4.5 | N | N | N | 8   |
| NCGC00160456-01 | IODOHIPPURATE SODIUM, I-123                          | 0.00 | -4.5 | -4.5 | N | N | N | -8  |
| NCGC00160503-01 | Tritiozina                                           | 0.00 | -4.5 | -4.5 | N | N | N | 11  |
| NCGC00160542-01 | Lifibrate                                            | 0.00 | -4.5 | -4.5 | N | N | N | 13  |
| NCGC00160623-01 | Octinoxate                                           | 0.00 | -4.5 | -4.5 | N | N | N | 8   |
| NCGC00164553-01 | Clofarabine                                          | 0.00 | -4.5 | -4.5 | N | N | N | -8  |
| NCGC00167543-01 | CEFTIOFUR CRYSTALLINE FREE ACID                      | 0.00 | -4.5 | -4.5 | N | N | N | -16 |
| NCGC00167577-01 | SIVELESTAT SODIUM HYDRATE                            | 0.00 | -4.5 | -4.5 | N | N | N | 4   |
| NCGC00167737-01 | LAZABEMIDE HYDROCHLORIDE                             | 0.00 | -4.5 | -4.5 | N | N | N | 6   |

|                 |                                           |      |      |      |      |      |   |   |   |     |
|-----------------|-------------------------------------------|------|------|------|------|------|---|---|---|-----|
| NCGC00167966-01 | HYALURONATE SODIUM                        | 0.00 |      | -4.5 | -4.5 |      | N | N | N | 8   |
| NCGC00168759-02 | PTC 124                                   | 0.00 |      | -4.5 | -4.5 |      | N | N | N | 0   |
| NCGC00181082-01 | METHYLBENACTYZIUM BROMIDE                 | 0.00 |      | -4.5 | -4.5 |      | N | N | N | -18 |
| NCGC00013724-01 | Proscamide                                | 0.00 | 0.00 | -4.5 | -4.5 | -4.5 | N | N | N |     |
| NCGC00014810-01 | domperidone                               | 0.00 | 0.00 | -4.5 | -4.5 | -4.5 | N | N | N |     |
| NCGC00015075-04 | ARECOLINE                                 | 0.00 | 0.00 | -4.5 | -4.5 | -4.5 | N | N | N |     |
| NCGC00015149-02 | Bumetanide                                | 0.00 | 0.00 | -4.5 | -4.5 | -4.5 | N | N | N |     |
| NCGC00015199-08 | CHLORAMBUCIL                              | 0.00 | 0.00 | -4.5 | -4.5 | -4.5 | N | N | N |     |
| NCGC00015207-07 | CILOSTAZOL                                | 0.00 | 0.00 | -4.5 | -4.5 | -4.5 | N | N | N |     |
| NCGC00015209-05 | Cyclophosphamide                          | 0.00 | 0.00 | -4.5 | -4.5 | -4.5 | N | N | N |     |
| NCGC00015380-09 | DIAZOXIDE                                 | 0.00 | 0.00 | -4.5 | -4.5 | -4.5 | N | N | N |     |
| NCGC00015467-11 | GLYBURIDE                                 | 0.00 | 0.00 | -4.5 | -4.5 | -4.5 | N | N | N |     |
| NCGC00015471-02 | Ganciclovir                               | 0.00 | 0.00 | -4.5 | -4.5 | -4.5 | N | N | N |     |
| NCGC00015640-02 | Metrifudil                                | 0.00 | 0.00 | -4.5 | -4.5 | -4.5 | N | N | N |     |
| NCGC00015649-02 | Moxonidine                                | 0.00 | 0.00 | -4.5 | -4.5 | -4.5 | N | N | N |     |
| NCGC00015703-03 | MECAMYLAMINE                              | 0.00 | 0.00 | -4.5 | -4.5 | -4.5 | N | N | N |     |
| NCGC00015725-02 | Nimesulide                                | 0.00 | 0.00 | -4.5 | -4.5 | -4.5 | N | N | N |     |
| NCGC00015726-06 | Nialamide                                 | 0.00 | 0.00 | -4.5 | -4.5 | -4.5 | N | N | N |     |
| NCGC00015836-08 | PIRENZEPINE                               | 0.00 | 0.00 | -4.5 | -4.5 | -4.5 | N | N | N |     |
| NCGC00015893-02 | ROPINROLE                                 | 0.00 | 0.00 | -4.5 | -4.5 | -4.5 | N | N | N |     |
| NCGC00015897-02 | RANOLAZINE                                | 0.00 | 0.00 | -4.5 | -4.5 | -4.5 | N | N | N |     |
| NCGC00016099-04 | XAMOTEROL                                 | 0.00 | 0.00 | -4.5 | -4.5 | -4.5 | N | N | N |     |
| NCGC00016141-02 | Clodronic acid                            | 0.00 | 0.00 | -4.5 | -4.5 | -4.5 | N | N | N |     |
| NCGC00016241-06 | Furosemide                                | 0.00 | 0.00 | -4.5 | -4.5 | -4.5 | N | N | N |     |
| NCGC00016255-01 | Sulfinpyrazone                            | 0.00 | 0.00 | -4.5 | -4.5 | -4.5 | N | N | N |     |
| NCGC00016285-02 | Sulfanilamide                             | 0.00 | 0.00 | -4.5 | -4.5 | -4.5 | N | N | N |     |
| NCGC00016302-01 | Cyanocobalamin                            | 0.00 | 0.00 | -4.5 | -4.5 | -4.5 | N | N | N |     |
| NCGC00016322-08 | 4,4'-Sulfonyldianiline (Dapsone)          | 0.00 | 0.00 | -4.5 | -4.5 | -4.5 | N | N | N |     |
| NCGC00016334-01 | Hexestrol                                 | 0.00 | 0.00 | -4.5 | -4.5 | -4.5 | N | N | N |     |
| NCGC00016362-01 | Benzonate                                 | 0.00 | 0.00 | -4.5 | -4.5 | -4.5 | N | N | N |     |
| NCGC00016398-01 | Trichlormethiazide                        | 0.00 | 0.00 | -4.5 | -4.5 | -4.5 | N | N | N |     |
| NCGC00016497-05 | Ethionamide                               | 0.00 | 0.00 | -4.5 | -4.5 | -4.5 | N | N | N |     |
| NCGC00016500-01 | Diperodon hydrochloride                   | 0.00 | 0.00 | -4.5 | -4.5 | -4.5 | N | N | N |     |
| NCGC00016529-01 | Pramoxine hydrochloride                   | 0.00 | 0.00 | -4.5 | -4.5 | -4.5 | N | N | N |     |
| NCGC00016532-02 | DIMETHADIONE                              | 0.00 | 0.00 | -4.5 | -4.5 | -4.5 | N | N | N |     |
| NCGC00016537-01 | Rolitetraacycline                         | 0.00 | 0.00 | -4.5 | -4.5 | -4.5 | N | N | N |     |
| NCGC00016544-01 | Dehydroisoandosterone 3-acetate           | 0.00 | 0.00 | -4.5 | -4.5 | -4.5 | N | N | N |     |
| NCGC00016560-01 | Ethambutol dihydrochloride                | 0.00 | 0.00 | -4.5 | -4.5 | -4.5 | N | N | N |     |
| NCGC00016586-01 | Flurandrenolide                           | 0.00 | 0.00 | -4.5 | -4.5 | -4.5 | N | N | N |     |
| NCGC00016594-01 | Prilocaine hydrochloride                  | 0.00 | 0.00 | -4.5 | -4.5 | -4.5 | N | N | N |     |
| NCGC00016618-01 | Dimethisoquin hydrochloride               | 0.00 | 0.00 | -4.5 | -4.5 | -4.5 | N | N | N |     |
| NCGC00016668-02 | FOSFOSAL                                  | 0.00 | 0.00 | -4.5 | -4.5 | -4.5 | N | N | N |     |
| NCGC00016675-01 | Oxprenolol hydrochloride                  | 0.00 | 0.00 | -4.5 | -4.5 | -4.5 | N | N | N |     |
| NCGC00016705-05 | TOLFENAMIC ACID                           | 0.00 | 0.00 | -4.5 | -4.5 | -4.5 | N | N | N |     |
| NCGC00016706-01 | Parbendazole                              | 0.00 | 0.00 | -4.5 | -4.5 | -4.5 | N | N | N |     |
| NCGC00016708-01 | Selegiline hydrochloride                  | 0.00 | 0.00 | -4.5 | -4.5 | -4.5 | N | N | N |     |
| NCGC00016751-01 | Gliclazide                                | 0.00 | 0.00 | -4.5 | -4.5 | -4.5 | N | N | N |     |
| NCGC00016772-01 | Terbutaline hemisulfate                   | 0.00 | 0.00 | -4.5 | -4.5 | -4.5 | N | N | N |     |
| NCGC00016809-01 | Moricizine hydrochloride                  | 0.00 | 0.00 | -4.5 | -4.5 | -4.5 | N | N | N |     |
| NCGC00016813-01 | Pivmecillinam hydrochloride               | 0.00 | 0.00 | -4.5 | -4.5 | -4.5 | N | N | N |     |
| NCGC00016817-01 | Etomidate                                 | 0.00 | 0.00 | -4.5 | -4.5 | -4.5 | N | N | N |     |
| NCGC00016865-01 | Carteolol hydrochloride                   | 0.00 | 0.00 | -4.5 | -4.5 | -4.5 | N | N | N |     |
| NCGC00016887-01 | Meptazinol hydrochloride                  | 0.00 | 0.00 | -4.5 | -4.5 | -4.5 | N | N | N |     |
| NCGC00016897-01 | Ceforanide                                | 0.00 | 0.00 | -4.5 | -4.5 | -4.5 | N | N | N |     |
| NCGC00016973-01 | Letrozole                                 | 0.00 | 0.00 | -4.5 | -4.5 | -4.5 | N | N | N |     |
| NCGC00016977-01 | Dorzolamide hydrochloride                 | 0.00 | 0.00 | -4.5 | -4.5 | -4.5 | N | N | N |     |
| NCGC00016987-01 | Ajmaline                                  | 0.00 | 0.00 | -4.5 | -4.5 | -4.5 | N | N | N |     |
| NCGC00017032-01 | Gentamicine sulfate                       | 0.00 | 0.00 | -4.5 | -4.5 | -4.5 | N | N | N |     |
| NCGC00017062-01 | Meclofenamic acid sodium salt monohydrate | 0.00 | 0.00 | -4.5 | -4.5 | -4.5 | N | N | N |     |
| NCGC00017093-01 | Cephapirin sodium salt                    | 0.00 | 0.00 | -4.5 | -4.5 | -4.5 | N | N | N |     |
| NCGC00017098-01 | Indapamide                                | 0.00 | 0.00 | -4.5 | -4.5 | -4.5 | N | N | N |     |
| NCGC00017146-01 | Canrenoic acid potassium salt             | 0.00 | 0.00 | -4.5 | -4.5 | -4.5 | N | N | N |     |
| NCGC00017337-02 | Capsaicin                                 | 0.00 | 0.00 | -4.5 | -4.5 | -4.5 | N | N | N |     |
| NCGC00018113-03 | SODIUM PHENYLBUTYRATE                     | 0.00 | 0.00 | -4.5 | -4.5 | -4.5 | N | N | N |     |



|                 |                                             |      |      |      |      |      |   |   |   |
|-----------------|---------------------------------------------|------|------|------|------|------|---|---|---|
| NCGC00018163-06 | Bithionol                                   | 0.00 | 0.00 | -4.5 | -4.5 | -4.5 | N | N | N |
| NCGC00022612-04 | Cefaclorum                                  | 0.00 | 0.00 | -4.5 | -4.5 | -4.5 | N | N | N |
| NCGC00023212-07 | RIBAVIRIN                                   | 0.00 | 0.00 | -4.5 | -4.5 | -4.5 | N | N | N |
| NCGC00023509-03 | Lovastatin                                  | 0.00 | 0.00 | -4.5 | -4.5 | -4.5 | N | N | N |
| NCGC00024717-06 | N-NITRO-ARGININE METHYL ESTER               | 0.00 | 0.00 | -4.5 | -4.5 | -4.5 | N | N | N |
| NCGC00024822-02 | EVANS BLUE                                  | 0.00 | 0.00 | -4.5 | -4.5 | -4.5 | N | N | N |
| NCGC00024870-02 | REMOXIPRIDE                                 | 0.00 | 0.00 | -4.5 | -4.5 | -4.5 | N | N | N |
| NCGC00024996-02 | Colforsin                                   | 0.00 | 0.00 | -4.5 | -4.5 | -4.5 | N | N | N |
| NCGC00025070-01 | CGS 19755                                   | 0.00 | 0.00 | -4.5 | -4.5 | -4.5 | N | N | N |
| NCGC00065440-02 | TRIMECAINUM                                 | 0.00 | 0.00 | -4.5 | -4.5 | -4.5 | N | N | N |
| NCGC00090771-01 | beta-Cyclodextrin                           | 0.00 | 0.00 | -4.5 | -4.5 | -4.5 | N | N | N |
| NCGC00090794-01 | Chloroform                                  | 0.00 | 0.00 | -4.5 | -4.5 | -4.5 | N | N | N |
| NCGC00090874-02 | Piperonyl butoxide                          | 0.00 | 0.00 | -4.5 | -4.5 | -4.5 | N | N | N |
| NCGC00090961-02 | n-Butyl alcohol                             | 0.00 | 0.00 | -4.5 | -4.5 | -4.5 | N | N | N |
| NCGC00091058-04 | LINOLENIC ACID                              | 0.00 | 0.00 | -4.5 | -4.5 | -4.5 | N | N | N |
| NCGC00091099-02 | MITOBRONITOL                                | 0.00 | 0.00 | -4.5 | -4.5 | -4.5 | N | N | N |
| NCGC00091285-01 | Tricaprylin                                 | 0.00 | 0.00 | -4.5 | -4.5 | -4.5 | N | N | N |
| NCGC00091338-01 | p-Chloro-m-cresol                           | 0.00 | 0.00 | -4.5 | -4.5 | -4.5 | N | N | N |
| NCGC00091345-01 | Adipic acid                                 | 0.00 | 0.00 | -4.5 | -4.5 | -4.5 | N | N | N |
| NCGC00091655-02 | p-tert-Pentylphenol                         | 0.00 | 0.00 | -4.5 | -4.5 | -4.5 | N | N | N |
| NCGC00091666-01 | Eucalyptol                                  | 0.00 | 0.00 | -4.5 | -4.5 | -4.5 | N | N | N |
| NCGC00091695-01 | Triethylenetetramine                        | 0.00 | 0.00 | -4.5 | -4.5 | -4.5 | N | N | N |
| NCGC00091861-01 | Dacarbazine                                 | 0.00 | 0.00 | -4.5 | -4.5 | -4.5 | N | N | N |
| NCGC00091930-01 | Sodium hydrogen sulfate                     | 0.00 | 0.00 | -4.5 | -4.5 | -4.5 | N | N | N |
| NCGC00091937-01 | N-(1-Naphthyl)ethylenediamine 2HCl          | 0.00 | 0.00 | -4.5 | -4.5 | -4.5 | N | N | N |
| NCGC00092366-02 | RELCOVAPTANUM                               | 0.00 | 0.00 | -4.5 | -4.5 | -4.5 | N | N | N |
| NCGC00094159-01 | Naphazoline hydrochloride                   | 0.00 | 0.00 | -4.5 | -4.5 | -4.5 | N | N | N |
| NCGC00094227-01 | Picrotoxin                                  | 0.00 | 0.00 | -4.5 | -4.5 | -4.5 | N | N | N |
| NCGC00094324-02 | PYRIDOSTIGMINE BROMIDE                      | 0.00 | 0.00 | -4.5 | -4.5 | -4.5 | N | N | N |
| NCGC00094390-01 | 1-(2-Methoxyphenyl)piperazine hydrochloride | 0.00 | 0.00 | -4.5 | -4.5 | -4.5 | N | N | N |
| NCGC00094572-01 | AMITRAZ                                     | 0.00 | 0.00 | -4.5 | -4.5 | -4.5 | N | N | N |
| NCGC00094703-01 | ISOSORBIDE DINITRATE                        | 0.00 | 0.00 | -4.5 | -4.5 | -4.5 | N | N | N |
| NCGC00094738-01 | NORETHINDRONE                               | 0.00 | 0.00 | -4.5 | -4.5 | -4.5 | N | N | N |
| NCGC00094764-01 | PREDNISOLONE                                | 0.00 | 0.00 | -4.5 | -4.5 | -4.5 | N | N | N |
| NCGC00094824-01 | VINCAMINE                                   | 0.00 | 0.00 | -4.5 | -4.5 | -4.5 | N | N | N |
| NCGC00094894-01 | MEFEXAMIDE                                  | 0.00 | 0.00 | -4.5 | -4.5 | -4.5 | N | N | N |
| NCGC00094990-01 | ACEXAMIC ACID                               | 0.00 | 0.00 | -4.5 | -4.5 | -4.5 | N | N | N |
| NCGC00095000-01 | AMIPRILOSE                                  | 0.00 | 0.00 | -4.5 | -4.5 | -4.5 | N | N | N |
| NCGC00095022-01 | DIOSMIN                                     | 0.00 | 0.00 | -4.5 | -4.5 | -4.5 | N | N | N |
| NCGC00095134-01 | EZETIMIBE                                   | 0.00 | 0.00 | -4.5 | -4.5 | -4.5 | N | N | N |
| NCGC00095179-01 | ZOLPIDEM                                    | 0.00 | 0.00 | -4.5 | -4.5 | -4.5 | N | N | N |
| NCGC00095201-01 | CHAULMOSULFONE                              | 0.00 | 0.00 | -4.5 | -4.5 | -4.5 | N | N | N |
| NCGC00095762-01 | CREATININE                                  | 0.00 | 0.00 | -4.5 | -4.5 | -4.5 | N | N | N |
| NCGC00095772-01 | THIAMYLAL SODIUM                            | 0.00 | 0.00 | -4.5 | -4.5 | -4.5 | N | N | N |
| NCGC00142391-03 | Folic acid                                  | 0.00 | 0.00 | -4.5 | -4.5 | -4.5 | N | N | N |
| NCGC00142625-03 | TOCOPHEROL ACETATE                          | 0.00 | 0.00 | -4.5 | -4.5 | -4.5 | N | N | N |
| NCGC00159317-02 | HYDROCODONE BITARTRATE                      | 0.00 | 0.00 | -4.5 | -4.5 | -4.5 | N | N | N |
| NCGC00159329-02 | Testolactone                                | 0.00 | 0.00 | -4.5 | -4.5 | -4.5 | N | N | N |
| NCGC00159332-02 | Cefalotina                                  | 0.00 | 0.00 | -4.5 | -4.5 | -4.5 | N | N | N |
| NCGC00159340-02 | Tazobactam sodium                           | 0.00 | 0.00 | -4.5 | -4.5 | -4.5 | N | N | N |
| NCGC00159342-02 | PENICILLIN G BENZATHINE                     | 0.00 | 0.00 | -4.5 | -4.5 | -4.5 | N | N | N |
| NCGC00159362-02 | HUPERZINE A, L-                             | 0.00 | 0.00 | -4.5 | -4.5 | -4.5 | N | N | N |
| NCGC00159372-02 | SUCCINIC ACID                               | 0.00 | 0.00 | -4.5 | -4.5 | -4.5 | N | N | N |
| NCGC00159378-02 | PHENYLHYDRAZINE HYDROCHLORIDE               | 0.00 | 0.00 | -4.5 | -4.5 | -4.5 | N | N | N |
| NCGC00159382-02 | MENTHOL                                     | 0.00 | 0.00 | -4.5 | -4.5 | -4.5 | N | N | N |
| NCGC00159418-02 | TEGAFUR                                     | 0.00 | 0.00 | -4.5 | -4.5 | -4.5 | N | N | N |
| NCGC00159426-02 | CARBOCISTEINE                               | 0.00 | 0.00 | -4.5 | -4.5 | -4.5 | N | N | N |
| NCGC00159429-02 | Ubidecarenone                               | 0.00 | 0.00 | -4.5 | -4.5 | -4.5 | N | N | N |
| NCGC00159439-02 | Lorazepam                                   | 0.00 | 0.00 | -4.5 | -4.5 | -4.5 | N | N | N |
| NCGC00159463-03 | PHENACAINE HYDROCHLORIDE                    | 0.00 | 0.00 | -4.5 | -4.5 | -4.5 | N | N | N |
| NCGC00159476-02 | TRIBROMSALAN                                | 0.00 | 0.00 | -4.5 | -4.5 | -4.5 | N | N | N |
| NCGC00159502-02 | N-CYCLOHEXYLBENZOTHIAZYLSULFENAMIDE         | 0.00 | 0.00 | -4.5 | -4.5 | -4.5 | N | N | N |
| NCGC00160198-01 | 6-AMINOPENICILLANIC ACID                    | 0.00 | 0.00 | -4.5 | -4.5 | -4.5 | N | N | N |
| NCGC00160445-01 | Bromisovalum                                | 0.00 | 0.00 | -4.5 | -4.5 | -4.5 | N | N | N |

|                 |                                                          |      |      |      |      |      |   |   |   |
|-----------------|----------------------------------------------------------|------|------|------|------|------|---|---|---|
| NCGC00160449-01 | Fenclozic acid                                           | 0.00 | 0.00 | -4.5 | -4.5 | -4.5 | N | N | N |
| NCGC00160455-01 | Theofibrate                                              | 0.00 | 0.00 | -4.5 | -4.5 | -4.5 | N | N | N |
| NCGC00160469-01 | Gamolenic acid                                           | 0.00 | 0.00 | -4.5 | -4.5 | -4.5 | N | N | N |
| NCGC00160481-01 | Tioxidazole                                              | 0.00 | 0.00 | -4.5 | -4.5 | -4.5 | N | N | N |
| NCGC00160493-01 | Fosenazida                                               | 0.00 | 0.00 | -4.5 | -4.5 | -4.5 | N | N | N |
| NCGC00160562-01 | Quazodine                                                | 0.00 | 0.00 | -4.5 | -4.5 | -4.5 | N | N | N |
| NCGC00160580-01 | Osalmid                                                  | 0.00 | 0.00 | -4.5 | -4.5 | -4.5 | N | N | N |
| NCGC00160591-01 | HEXYL NICOTINATE                                         | 0.00 | 0.00 | -4.5 | -4.5 | -4.5 | N | N | N |
| NCGC00160605-01 | Diacetamate                                              | 0.00 | 0.00 | -4.5 | -4.5 | -4.5 | N | N | N |
| NCGC00160616-01 | PROTIRELIN                                               | 0.00 | 0.00 | -4.5 | -4.5 | -4.5 | N | N | N |
| NCGC00160625-01 | Acide iophenoique                                        | 0.00 | 0.00 | -4.5 | -4.5 | -4.5 | N | N | N |
| NCGC00160669-01 | Pexantel                                                 | 0.00 | 0.00 | -4.5 | -4.5 | -4.5 | N | N | N |
| NCGC00160673-01 | Propicillin                                              | 0.00 | 0.00 | -4.5 | -4.5 | -4.5 | N | N | N |
| NCGC00161345-04 | DOCOSAHEXAENOIC ACID                                     | 0.00 | 0.00 | -4.5 | -4.5 | -4.5 | N | N | N |
| NCGC00162319-02 | LY-163,502                                               | 0.00 | 0.00 | -4.5 | -4.5 | -4.5 | N | N | N |
| NCGC00163245-01 | GALLAMINE                                                | 0.00 | 0.00 | -4.5 | -4.5 | -4.5 | N | N | N |
| NCGC00163334-03 | ISOLEUCINE                                               | 0.00 | 0.00 | -4.5 | -4.5 | -4.5 | N | N | N |
| NCGC00163742-03 | D-LIMONENE                                               | 0.00 | 0.00 | -4.5 | -4.5 | -4.5 | N | N | N |
| NCGC00164091-01 | Sodium dichloroisocyanurate                              | 0.00 | 0.00 | -4.5 | -4.5 | -4.5 | N | N | N |
| NCGC00164400-01 | Danazol                                                  | 0.00 | 0.00 | -4.5 | -4.5 | -4.5 | N | N | N |
| NCGC00164401-01 | Betamethasone                                            | 0.00 | 0.00 | -4.5 | -4.5 | -4.5 | N | N | N |
| NCGC00164431-01 | Terpineol, mixture of isomers                            | 0.00 | 0.00 | -4.5 | -4.5 | -4.5 | N | N | N |
| NCGC00164512-01 | GUAIACOL CARBONATE                                       | 0.00 | 0.00 | -4.5 | -4.5 | -4.5 | N | N | N |
| NCGC00164529-01 | GLYCERYL MONOSTEARATE                                    | 0.00 | 0.00 | -4.5 | -4.5 | -4.5 | N | N | N |
| NCGC00164552-01 | BROMFENAC SODIUM                                         | 0.00 | 0.00 | -4.5 | -4.5 | -4.5 | N | N | N |
| NCGC00164557-01 | Eprosartan mesylate                                      | 0.00 | 0.00 | -4.5 | -4.5 | -4.5 | N | N | N |
| NCGC00164587-01 | Isepamicin                                               | 0.00 | 0.00 | -4.5 | -4.5 | -4.5 | N | N | N |
| NCGC00164594-01 | Loteprednol etabonate                                    | 0.00 | 0.00 | -4.5 | -4.5 | -4.5 | N | N | N |
| NCGC00164595-01 | voglibose                                                | 0.00 | 0.00 | -4.5 | -4.5 | -4.5 | N | N | N |
| NCGC00164602-01 | RACTOPAMINE HYDROCHLORIDE                                | 0.00 | 0.00 | -4.5 | -4.5 | -4.5 | N | N | N |
| NCGC00164605-01 | amproxicam                                               | 0.00 | 0.00 | -4.5 | -4.5 | -4.5 | N | N | N |
| NCGC00164607-01 | Bentiromide                                              | 0.00 | 0.00 | -4.5 | -4.5 | -4.5 | N | N | N |
| NCGC00164623-01 | OLOPATADINE HYDROCHLORIDE                                | 0.00 | 0.00 | -4.5 | -4.5 | -4.5 | N | N | N |
| NCGC00165973-01 | THIOGLYCEROL                                             | 0.00 | 0.00 | -4.5 | -4.5 | -4.5 | N | N | N |
| NCGC00165996-01 | PRAXADINUM                                               | 0.00 | 0.00 | -4.5 | -4.5 | -4.5 | N | N | N |
| NCGC00166237-01 | Mepiroxol                                                | 0.00 | 0.00 | -4.5 | -4.5 | -4.5 | N | N | N |
| NCGC00166270-01 | PHLOROGLUCINOL                                           | 0.00 | 0.00 | -4.5 | -4.5 | -4.5 | N | N | N |
| NCGC00166306-01 | Argjpressin acetate                                      | 0.00 | 0.00 | -4.5 | -4.5 | -4.5 | N | N | N |
| NCGC00166317-01 | PHOSPHAMIDON                                             | 0.00 | 0.00 | -4.5 | -4.5 | -4.5 | N | N | N |
| NCGC00166323-01 | Trifluridine                                             | 0.00 | 0.00 | -4.5 | -4.5 | -4.5 | N | N | N |
| NCGC00167429-01 | TEMOZOLOMIDE                                             | 0.00 | 0.00 | -4.5 | -4.5 | -4.5 | N | N | N |
| NCGC00167439-01 | TRENBOLONE ACETATE                                       | 0.00 | 0.00 | -4.5 | -4.5 | -4.5 | N | N | N |
| NCGC00167454-01 | PILSICAINIDE HYDROCHLORIDE                               | 0.00 | 0.00 | -4.5 | -4.5 | -4.5 | N | N | N |
| NCGC00167462-01 | ACAMPROSATE CALCIUM                                      | 0.00 | 0.00 | -4.5 | -4.5 | -4.5 | N | N | N |
| NCGC00167475-01 | DIETHYLPROPION HYDROCHLORIDE                             | 0.00 | 0.00 | -4.5 | -4.5 | -4.5 | N | N | N |
| NCGC00167479-01 | N,N'-1,2-ETHYLENEDIYLBIS-CYSTEINE, DIETHYL ESTER DIHYDRO | 0.00 | 0.00 | -4.5 | -4.5 | -4.5 | N | N | N |
| NCGC00167501-01 | METHAQUALONE                                             | 0.00 | 0.00 | -4.5 | -4.5 | -4.5 | N | N | N |
| NCGC00167505-01 | EPTIFIBATIDE                                             | 0.00 | 0.00 | -4.5 | -4.5 | -4.5 | N | N | N |
| NCGC00167526-01 | CAMOSTAT MESILATE                                        | 0.00 | 0.00 | -4.5 | -4.5 | -4.5 | N | N | N |
| NCGC00167535-01 | TENOFOVIR DISOPROXIL FUMARATE                            | 0.00 | 0.00 | -4.5 | -4.5 | -4.5 | N | N | N |
| NCGC00167547-01 | AGARICINUM                                               | 0.00 | 0.00 | -4.5 | -4.5 | -4.5 | N | N | N |
| NCGC00167568-01 | COLFOSCERIL PALMITATE                                    | 0.00 | 0.00 | -4.5 | -4.5 | -4.5 | N | N | N |
| NCGC00167574-01 | XALIPRODEN HYDROCHLORIDE                                 | 0.00 | 0.00 | -4.5 | -4.5 | -4.5 | N | N | N |
| NCGC00167584-01 | NICAMETATE CITRATE                                       | 0.00 | 0.00 | -4.5 | -4.5 | -4.5 | N | N | N |
| NCGC00181000-01 | SUPLATAST TOSILATE                                       | 0.00 | 0.00 | -4.5 | -4.5 | -4.5 | N | N | N |
| NCGC00181093-01 | MEGLUMINE                                                | 0.00 | 0.00 | -4.5 | -4.5 | -4.5 | N | N | N |
| NCGC00181111-01 | TAMIBAROTENE                                             | 0.00 | 0.00 | -4.5 | -4.5 | -4.5 | N | N | N |
| NCGC00181123-01 | CINEPAZIDE MALEATE                                       | 0.00 | 0.00 | -4.5 | -4.5 | -4.5 | N | N | N |
| NCGC00181148-01 | METHARBITAL                                              | 0.00 | 0.00 | -4.5 | -4.5 | -4.5 | N | N | N |
| NCGC00016374-02 | Carbarstone                                              |      |      |      | -4.9 | -4.7 | N | I | I |
| NCGC00015277-02 | Cinoxacin                                                |      |      |      | -5.1 | -5.1 | N | I | I |
| NCGC00015784-07 | PIRENPERONE                                              |      |      |      | -4.8 | -4.8 | N | I | I |
| NCGC00015826-02 | Perphenazine                                             |      |      |      | -5.1 | -5.1 | N | I | I |
| NCGC00015883-05 | RISPERIDONE                                              |      |      |      | -4.7 | -4.8 | N | I | I |

|     |     |     |
|-----|-----|-----|
| -21 | -57 | -42 |
| -26 | -34 | -37 |
| -14 | -40 | -39 |
| -32 | -65 | -67 |
| -19 | -36 | -46 |

|                 |                               |      |      |   |   |  |     |     |     |
|-----------------|-------------------------------|------|------|---|---|--|-----|-----|-----|
| NCGC00016429-05 | R-(+)-PROPRANOLOL             | -4.7 | -4.8 | N |   |  | -27 | -36 | -57 |
| NCGC00017259-04 | NICERGOLINE                   | -4.7 | -4.7 | N |   |  | -35 | -47 | -53 |
| NCGC00018193-06 | FLUVOXAMINE                   | -4.8 | -4.9 | N |   |  | -31 | -50 | -53 |
| NCGC00090777-05 | Methoprene                    | -4.7 | -4.7 | N |   |  | -34 | -55 | -71 |
| NCGC00090879-01 | 6-Thioguanine (6-TG)          | -4.7 | -4.8 | N |   |  | -18 | -39 | -42 |
| NCGC00091071-01 | CHLOROPHENOTHANE              | -4.8 | -4.7 | N |   |  | -23 | -52 | -45 |
| NCGC00094135-01 | Minocycline hydrochloride     | -4.9 | -4.7 | N |   |  | -28 | -32 | -44 |
| NCGC00094502-01 | Urapidil hydrochloride        | -4.7 | -4.8 | N |   |  | -29 | -35 | -58 |
| NCGC00094600-01 | BENZTROPINE                   | -4.7 | -4.7 | N |   |  | -26 | -41 | -60 |
| NCGC00094812-01 | ACETARSOL                     | -4.8 | -4.7 | N |   |  | -29 | -52 | -42 |
| NCGC00094991-01 | PIPENZOLATE BROMIDE           | -4.9 | -4.8 | N |   |  | -33 | -39 | -54 |
| NCGC00095051-01 | SEMUSTINE                     | -4.8 | -4.7 | N |   |  | -36 | -61 | -70 |
| NCGC00095132-01 | BENAZEPRIL HYDROCHLORIDE      | -4.8 | -4.7 | N |   |  | -26 | -70 | -63 |
| NCGC00095159-01 | PEFLOXACINE MESYLATE          | -4.9 | -4.8 | N |   |  | -27 | -42 | -46 |
| NCGC00095173-01 | AZELASTINE HYDROCHLORIDE      | -4.7 | -4.7 | N |   |  | -29 | -37 | -46 |
| NCGC00095597-01 | ANDROGRAPHOLIDE               | -4.7 | -4.8 | N |   |  | -35 | -41 | -46 |
| NCGC00095835-01 | AMLODIPINE BESYLATE           | -4.7 | -4.7 | N |   |  | -27 | -45 | -50 |
| NCGC00159428-02 | Digitoxin                     | -4.8 | -4.9 | N |   |  | -33 | -54 | -44 |
| NCGC00164539-01 | Azaclorzina                   | -4.7 | -4.7 | N |   |  | -28 | -52 | -54 |
| NCGC00166290-02 | LAURETH-4                     | -4.8 | -4.9 | N |   |  | -28 | -47 | -55 |
| NCGC00166308-01 | DIFLOXACIN HYDROCHLORIDE      | -4.8 | -4.8 | N |   |  | -34 | -43 | -46 |
| NCGC00167457-01 | GESTRINONE                    | -4.9 | -4.9 | N |   |  | -22 | -39 | -47 |
| NCGC00167521-01 | TENATOPRAZOLE                 | -4.9 | -5.0 | N |   |  | -23 | -42 | -43 |
| NCGC00167834-01 | MOEXIPRIL HYDROCHLORIDE       | -4.9 | -4.8 | N |   |  | -25 | -43 | -47 |
| NCGC00181013-01 | MIZOLASTINE                   | -4.8 | -5.0 | N |   |  | -23 | -39 | -38 |
| NCGC00181098-01 | NELARABINE                    | -4.8 | -4.9 | N |   |  | -24 | -46 | -53 |
| NCGC00181099-01 | SICCANIN                      | -5.0 | -4.9 | N |   |  | -34 | -43 | -33 |
| NCGC00091641-01 | 6-Mercaptopurine monohydrate  | -5.0 | -4.9 | N |   |  | -27 | -53 | -46 |
| NCGC00016583-01 | Oxybutynin chloride           | -4.7 | -4.7 | N | N |  | -12 | -25 | -44 |
| NCGC00091357-01 | Orotic acid                   | -4.7 | -4.7 | N | N |  | -8  | -27 | -45 |
| NCGC00164501-01 | Nihidrazona                   |      |      | N | N |  | -33 | -27 | -39 |
| NCGC00164526-01 | ACAMYLOPHENINE HYDROCHLORIDE  | -4.9 | -4.9 | N | N |  | -20 | -29 | -33 |
| NCGC00166207-01 | Cridanimod                    | -4.8 | -4.8 | N | N |  | -17 | -12 | -57 |
| NCGC00167817-01 | BUCINDOLOLUM                  | -4.7 | -4.7 | N | N |  | -22 | -28 | -40 |
| NCGC00167965-01 | LUTEIN                        | -4.7 | -4.7 | N | N |  | -20 | -27 | -40 |
| NCGC00181102-01 | METOSERPATE HYDROCHLORIDE     | -4.7 | -4.7 | N | N |  | -23 | -29 | -40 |
| NCGC00013051-01 | tert-Butylhydroquinone        | -4.7 | -4.7 | N | N |  | -31 | -12 | -76 |
| NCGC00015254-12 | CLOZAPINE                     | -4.8 | -4.8 | N | N |  | -27 | -39 | -33 |
| NCGC00015501-02 | Hydralazine hydrochloride     | -5.1 | -4.8 | N | N |  | -28 | -6  | -43 |
| NCGC00015519-05 | DOPAMINE                      | -4.7 | -4.7 | N | N |  | -17 | -30 | -40 |
| NCGC00015563-07 | IMIPRAMINE                    | -4.9 | -4.9 | N | N |  | -28 | -23 | -32 |
| NCGC00015774-03 | Oxatomide                     | -4.8 | -4.8 | N | N |  | -30 | -27 | -43 |
| NCGC00016043-03 | Tyrphostin 23                 | -4.8 | -4.8 | N | N |  | -31 | -31 | -43 |
| NCGC00016066-07 | URAPIDIL                      | -4.9 | -4.9 | N | N |  | -32 | -27 | -37 |
| NCGC00016083-09 | VERAPAMIL                     | -5.5 | -4.8 | N | N |  | -34 | 8   | -51 |
| NCGC00016280-02 | ZOXAZOLAMINE                  | -4.8 | -4.8 | N | N |  | -39 | -28 | -45 |
| NCGC00016525-01 | Zuclopenthixol hydrochloride  | -5.1 | -4.8 | N | N |  | -23 | -33 | -46 |
| NCGC00016907-01 | Ketoconazole                  | -4.7 | -4.7 | N | N |  | -25 | -31 | -35 |
| NCGC00016944-01 | Cisapride                     | -5.2 | -4.8 | N | N |  | -32 | -22 | -68 |
| NCGC00016964-01 | Lomefloxacin hydrochloride    | -4.8 | -4.8 | N | N |  | -26 | -23 | -38 |
| NCGC00074024-02 | RUFLOXACINUM                  | -4.8 | -4.8 | N | N |  | -29 | -31 | -42 |
| NCGC00091125-01 | Gallic acid                   | -4.7 | -4.7 | N | N |  | -15 | -32 | -44 |
| NCGC00092334-01 | ZATEBRADINUM                  | -4.8 | -4.8 | N | N |  | -26 | -39 | -48 |
| NCGC00094410-02 | TRIFLUPROMAZINE HYDROCHLORIDE | -4.7 | -4.7 | N | N |  | -32 | -29 | -45 |
| NCGC00094515-01 | Zimelidine dihydrochloride    | -4.9 | -4.9 | N | N |  | -22 | -39 | -38 |
| NCGC00094516-01 | COUMOPHOS                     | -4.7 | -4.7 | N | N |  | -20 | -34 | -47 |
| NCGC00095907-01 | NONOXYNOL-9                   | -4.8 | -4.8 | N | N |  | -28 | -29 | -46 |
| NCGC00095978-02 | Lufenuron                     | -4.7 | -4.7 | N | N |  | -20 | -34 | -35 |
| NCGC00159518-02 | RABEPRAZOLE SODIUM            | -4.7 | -4.7 | N | N |  | -16 | -26 | -36 |
| NCGC00159544-01 | ZALDARIDUM                    | -4.7 | -4.7 | N | N |  | -28 | -34 | -45 |
| NCGC00160410-01 | CHINIOFONUM                   | -4.8 | -4.8 | N | N |  | -22 | -27 | -40 |
| NCGC00160526-01 | Befuralina                    | -4.9 | -4.9 | N | N |  | 10  | -21 | -58 |
| NCGC00160590-01 | Bromindione                   | -4.7 | -4.7 | N | N |  | -20 | -30 | -41 |
| NCGC00163132-01 | DANTROLENE                    | -4.8 | -4.8 | N | N |  | -25 | -29 | -50 |

|                 |                                                        |      |      |      |      |   |   |   |      |      |      |
|-----------------|--------------------------------------------------------|------|------|------|------|---|---|---|------|------|------|
| NCGC00163509-01 | MK-571                                                 |      |      |      | -4.7 | N | N | I | -35  | -22  | -36  |
| NCGC00164611-01 | GESTODENE                                              |      |      |      | -4.9 | N | N | I | -23  | -34  | -45  |
| NCGC00166411-01 | OXELADIN TANNATE                                       |      |      |      | -4.7 | N | N | I | -19  | -27  | -42  |
| NCGC00166415-01 | PALONOSETRON HYDROCHLORIDE                             |      |      |      | -4.8 | N | N | I | -27  | -27  | -43  |
| NCGC00167423-01 | BEVONIUM METHYLSULFATE                                 |      |      |      | -4.7 | N | N | I | -31  | -28  | -41  |
| NCGC00167508-01 | DEFLAZACORT                                            |      |      |      | -4.7 | N | N | I | -22  | -20  | -38  |
| NCGC00167525-01 | TAZAROTENE                                             |      |      |      | -4.7 | N | N | I | -23  | -31  | -61  |
| NCGC00167532-01 | BALOFLOXACIN HYDRATE                                   |      |      |      | -4.7 | N | N | I | -25  | -20  | -54  |
| NCGC00181024-01 | INDOCYANINE GREEN                                      |      |      |      | -4.9 | N | N | I | -21  | -23  | -34  |
| NCGC00181129-01 | DASATINIB                                              |      |      |      | -4.7 | N | N | I | -32  | -36  | -42  |
| NCGC00181301-01 | ACETYLTRIBUTYL CITRATE                                 |      |      |      | -4.7 | N | N | I | -26  | -29  | -47  |
| NCGC00160554-01 | Bithionoloxide                                         |      |      |      |      | N | N | N | -108 | -125 | -83  |
| NCGC00015889-05 | Raloxifene hydrochloride                               |      |      |      |      | N | N | N | -100 | -89  | -32  |
| NCGC00013042-01 | 8-quinolinol and salicylic acid                        | -4.5 |      |      |      | N | N | N |      | -9   | -12  |
| NCGC00159486-02 | METHENAMINE HIPPURATE                                  |      |      |      |      | N | N | N | -99  | -97  | -97  |
| NCGC00164248-01 | Sucralox                                               |      |      |      |      | N | N | N | -18  | -52  | 3    |
| NCGC00166307-01 | ERGOCALCIFEROL                                         | -4.5 |      |      |      | N | N | N |      | -100 | -26  |
| NCGC00016395-01 | Diphenylpyraline hydrochloride                         |      |      |      |      | N | N | N | 6    | -28  | -62  |
| NCGC00014437-01 | strychnidin-10-one                                     |      | -4.9 | -5.2 |      | N | I | I | -17  | -44  | -43  |
| NCGC00014496-01 | Dexrazoxane                                            |      | -4.8 | -5.0 |      | N | I | I | -32  | -37  | -45  |
| NCGC00096122-03 | Thionosine                                             |      | -4.9 | -4.8 |      | N | I | I | -26  | -61  | -60  |
| NCGC00163241-01 | STRYCHNINE                                             |      | -4.8 | -5.2 |      | N | I | I | -24  | -47  | -41  |
| NCGC00094525-01 | DIURON                                                 |      | -5.3 | -5.3 |      | N | I | I | -29  | -58  | -66  |
| NCGC00094932-01 | LANATOSIDE C                                           |      | -5.2 | -5.3 |      | N | I | I | -10  | -39  | -40  |
| NCGC00016528-01 | Proguanil hydrochloride                                |      |      | -5.5 |      | N | N | I | -29  | -39  | -63  |
| NCGC00016687-01 | Spiramycin                                             |      |      | -5.4 |      | N | N | I | -22  | -17  | -36  |
| NCGC00016830-01 | Midecamycin                                            |      |      | -5.4 |      | N | N | I | -32  | -29  | -37  |
| NCGC00016916-01 | Norfloxacin                                            |      |      | -5.4 |      | N | N | I | -19  | -28  | -36  |
| NCGC00016106-04 | Zardaverine                                            |      |      |      |      | N | N | N | -17  | -32  | -77  |
| NCGC00167465-01 | CALCIPOTRIENE                                          |      |      |      |      | N | N | N | -81  | -8   | -31  |
| NCGC00159494-02 | riboflavin                                             | -4.5 |      |      |      | N | N | N |      | -86  | -34  |
| NCGC00024309-05 | DILTIAZEM                                              |      |      |      |      | N | N | N | 7    | -62  | -52  |
| NCGC00160682-01 | Isobutamben                                            |      | -4.5 |      |      | N | N | A | -1   | -38  | -8   |
| NCGC00013037-01 | isobornyl thiocyanacetate                              |      |      |      |      | N | N | N | 0    | -91  | -45  |
| NCGC00167566-01 | BOLDO                                                  |      |      |      |      | N | N | N | -93  | -100 | -29  |
| NCGC00160423-01 | Bametano                                               | -4.5 |      |      |      | N | N | N |      | -49  | -38  |
| NCGC00167426-01 | CARAMIPHEN EDISYLATE                                   | -4.5 |      |      |      | N | N | N |      | -102 | -95  |
| NCGC00027960-02 | ACIDUM CAPOBENICUM                                     |      | -4.9 |      |      | N | N | A | -35  | -22  | -12  |
| NCGC00015630-02 | Metolazone                                             |      | -4.5 |      |      | N | N | N | 4    |      | -33  |
| NCGC00024633-02 | AMI-193                                                |      |      |      |      | N | I | N | -96  | -90  | -55  |
| NCGC00160555-01 | Nifursol                                               |      |      |      |      | N | N | N | -94  | -37  | -100 |
| NCGC00013414-03 | PROCODAZOLUM                                           |      |      |      |      | N | N | N | -100 | -99  | -101 |
| NCGC00167431-01 | RIFAPENTINE                                            |      |      |      |      | N | N | N | -97  | -97  | -97  |
| NCGC00094384-01 | R(-)-Denopamine                                        |      |      |      |      | N | N | N | -47  | -73  | -75  |
| NCGC00160641-01 | Sulazepam                                              |      |      |      |      | N | N | N | -56  | -60  | -61  |
| NCGC00095996-01 | ACIVICIN                                               | -4.5 |      |      |      | N | N | N | -102 |      | -101 |
| NCGC00090714-01 | Sodium xylenesulfonate                                 |      | -7.9 |      |      | N | N | A | -2   | -8   | -30  |
| NCGC00168777-01 | ETONOGESTREL                                           |      |      |      |      | N | N | N | -31  | -83  | -81  |
| NCGC00017245-02 | ELLAGIC ACID                                           | -5.8 | -5.8 |      |      | N | A | A | -99  | -96  | -103 |
| NCGC00181323-01 | SQUALENE                                               |      |      |      |      | N | N | N | -100 | -97  | -98  |
| NCGC00181302-01 | CYTOCHROME C                                           |      |      |      |      | N | N | N | -72  | -50  | -75  |
| NCGC00018256-02 | OXYPHENONIUM BROMIDE                                   |      |      |      |      | N | N | N | -90  | -92  | -94  |
| NCGC00166289-01 | HYDROXYSTILBAMIDINE ISETHIONATE                        | -4.5 |      |      |      | N | N | N |      | -51  | -64  |
| NCGC00094851-01 | IODIPAMIDE                                             | -4.5 |      |      |      | N | N | N |      | -98  | -100 |
| NCGC00016367-01 | Succinylsulfathiazole                                  | -4.5 |      |      |      | N | N | N |      | -63  | -56  |
| NCGC00091456-01 | 2-Methylimidazole                                      | -4.5 |      |      |      | N | N | N |      | -55  | -61  |
| NCGC00016589-01 | (1-[(4-Chlorophenyl)phenyl-methyl]-4-methylpiperazine) | -4.5 |      |      |      | N | N | N |      | -58  | -38  |
| NCGC00159345-02 | ATROPINE                                               |      |      |      |      | N | N | N | 2    | -68  | -56  |
| NCGC00094935-01 | ACETYL-L-LEUCINE                                       |      | -6.3 |      |      | N | N | A | -29  | -23  | -5   |
| NCGC00160295-01 | Benaxibine                                             |      |      |      |      | N | N | N | -27  | -33  | -42  |
| NCGC00165791-02 | EPINASTINE HYDROCHLORIDE                               | -4.7 |      |      |      | N | I | N | -78  | -51  | -31  |
| NCGC00159387-02 | Laureth 10s                                            | -5.7 |      |      |      | N | I | N | -5   | -55  | 5    |
| NCGC00016562-01 | Ethopropazine hydrochloride                            | -5.1 |      |      |      | N | I | N | -28  | -36  | -33  |
| NCGC00163232-01 | PANCURONIUM                                            | -5.0 |      |      |      | N | I | N | -8   | -39  | -31  |

|                 |                                         |      |      |      |   |   |   |     |     |     |
|-----------------|-----------------------------------------|------|------|------|---|---|---|-----|-----|-----|
| NCGC00160572-01 | Metazida                                |      |      |      | N | A | N | 14  | 40  | 28  |
| NCGC00166141-01 | Carbinoxamine maleate                   |      |      |      | N | N | N | -34 | -8  | -12 |
| NCGC00013012-01 | D-XYLO-5-HEXULOSONIC ACID, CALCIUM SALT |      | -4.5 |      | N | N | N | -5  | 12  |     |
| NCGC00013225-01 | 2-Oxopentanedioic acid                  | -4.5 | -4.5 |      | N | N | N | -1  |     |     |
| NCGC00013260-01 | Yohimbine                               |      | -4.5 |      | N | N | N | 0   |     | -1  |
| NCGC00013273-01 | Pyridoxamine dichlorohydrate            | -4.5 |      |      | N | N | N |     | 1   | 1   |
| NCGC00013289-01 | pridinol                                |      | -4.5 |      | N | N | N | -1  |     | 0   |
| NCGC00013426-01 | Cholic Acid                             |      | -4.5 |      | N | N | N | -3  |     | 5   |
| NCGC00013489-01 | sulfaquinoxaline                        |      | -4.5 |      | N | N | N | -1  |     | 1   |
| NCGC00013628-01 | Solvocillin                             |      |      |      | N | N | N | -2  | -1  | -8  |
| NCGC00013679-02 | Fenticlor                               |      |      |      | N | N | N | -10 | -8  | -27 |
| NCGC00013687-01 | Phosphotex                              |      |      |      | N | N | N | 0   | 17  | 12  |
| NCGC00013718-01 | HOMATROPINE                             |      | -4.5 |      | N | N | N | 0   |     | -2  |
| NCGC00013722-01 | scopolamine                             |      | -4.5 |      | N | N | N | -2  |     | 6   |
| NCGC00013725-01 | Mintussin                               |      | -4.5 |      | N | N | N | -9  |     | -2  |
| NCGC00013796-01 | Atropine oxide                          |      | -4.5 |      | N | N | N | -1  |     | 9   |
| NCGC00013841-01 | Flexeril                                |      |      |      | N | N | N | -24 | -30 | -33 |
| NCGC00013895-01 | benzbromarone                           | -4.5 | -4.5 |      | N | N | N | -2  |     |     |
| NCGC00014017-01 | DL-Proline                              |      |      |      | N | N | N | 3   | 7   | 11  |
| NCGC00014361-03 | Phosphonoacetic acid                    |      |      |      | N | N | N | -31 | -25 | -22 |
| NCGC00014486-01 | Adriamycin-DNA hydrochloride            | -4.5 | -4.5 |      | N | N | N | -1  |     |     |
| NCGC00014617-01 |                                         |      | -4.5 |      | N | N | N | 1   | 11  |     |
| NCGC00014633-01 | Floxacillin                             | -4.5 |      |      | N | N | N |     | 4   | 9   |
| NCGC00014711-01 | Spiclomazine                            |      | -4.5 |      | N | N | N | -1  | 10  |     |
| NCGC00014750-02 | Ebumamonine (-)                         |      |      |      | N | N | N | -10 | 3   | -15 |
| NCGC00014918-01 | oxaprozin                               |      |      |      | N | N | N | 1   | 7   | -1  |
| NCGC00014993-07 | Nonanedioic acid                        |      |      |      | N | N | N | -1  | 2   | 12  |
| NCGC00015004-09 | AMOXAPINE                               |      |      |      | N | N | N | -1  | -12 | -12 |
| NCGC00015009-08 | 4-AMINOPYRIDINE                         |      |      |      | N | N | N | 16  | -11 | 1   |
| NCGC00015036-03 | AMANTIDINE                              |      |      |      | N | N | N | 3   | 14  | 15  |
| NCGC00015038-03 | AMINOPTERIN                             | -4.5 | -4.5 |      | N | N | N | 11  |     |     |
| NCGC00015043-07 | GABA                                    |      |      |      | N | N | N | -1  | 14  | -1  |
| NCGC00015061-02 | Acyclovir                               |      | -4.5 |      | N | N | N | 1   |     | -2  |
| NCGC00015067-04 | Acetylsalicylic acid                    | -4.5 |      |      | N | N | N |     | 8   | -1  |
| NCGC00015092-02 | Aminocaproic acid                       |      |      |      | N | N | N | 0   | 7   | -3  |
| NCGC00015094-02 | Allopurinol                             |      |      |      | N | N | N | 0   | 0   | 0   |
| NCGC00015099-05 | ALPRENOLOL                              |      |      |      | N | N | N | -7  | -8  | -21 |
| NCGC00015100-02 | Altretamine                             | -4.5 |      |      | N | N | N |     | 8   | 3   |
| NCGC00015116-10 | ANIRACETAM                              | -4.5 |      |      | N | N | N |     | 7   | 5   |
| NCGC00015159-06 | BETAXOLOL                               |      | -4.5 |      | N | N | N | 4   |     | -16 |
| NCGC00015162-04 | BUSPIRONE                               |      | -4.5 |      | N | N | N | 1   |     | -11 |
| NCGC00015191-06 | CHLORMEZANONE                           |      | -4.5 | -4.5 | N | N | N | 0   |     |     |
| NCGC00015196-04 | CIRAZOLINE                              |      |      | -4.5 | N | N | N | 2   | 1   |     |
| NCGC00015204-05 | Carmustine                              |      |      |      | N | N | N | 5   | 8   | 7   |
| NCGC00015208-09 | Caffeine, citrated                      |      |      |      | N | N | N | 0   | 10  | 4   |
| NCGC00015215-02 | EPICATECHIN                             | -4.5 |      |      | N | N | N |     | -1  | -2  |
| NCGC00015234-11 | Carbamazepine                           |      | -4.5 | -4.5 | N | N | N | -5  |     |     |
| NCGC00015238-02 | Chlorzoxazone                           |      |      | -4.5 | N | N | N | -2  | 4   |     |
| NCGC00015240-06 | CIMETIDINE                              |      |      | -4.5 | N | N | N | 2   | -1  |     |
| NCGC00015242-04 | Chlorothiazide                          |      |      | -4.5 | N | N | N | 2   | 4   |     |
| NCGC00015243-02 | Clemizole hydrochloride                 |      |      | -4.5 | N | N | N | -8  | 0   |     |
| NCGC00015247-04 | 1-(3-CHLOROPHENYL)PIPERAZINE            |      |      |      | N | N | N | -2  | 6   | 4   |
| NCGC00015252-08 | CYPROHEPTADINE                          |      |      | -4.5 | N | N | N | 6   | 10  |     |
| NCGC00015255-04 | p-Chlorophenylalanine                   | -4.5 |      |      | N | N | N |     | 4   | 6   |
| NCGC00015269-03 | Cilostamide                             |      |      |      | N | N | N | 0   | -3  | 2   |
| NCGC00015278-09 | Carisoprodol                            |      | -4.5 |      | N | N | N | 3   | 12  |     |
| NCGC00015288-06 | CYCLOTHIAZIDE                           | -4.5 |      |      | N | N | N |     | 5   | -1  |
| NCGC00015321-04 | DOBUTAMINE                              |      |      |      | N | N | N | 9   | 26  | 13  |
| NCGC00015335-07 | DIPHENHYDRAMINE                         |      |      | -4.5 | N | N | N | 4   | 12  |     |
| NCGC00015340-02 | Desipramine hydrochloride               |      |      |      | N | N | N | -16 | -11 | -14 |
| NCGC00015344-03 | Doxepin hydrochloride                   | -4.5 | -4.5 |      | N | N | N | -1  |     |     |
| NCGC00015360-05 | Pentetic acid                           |      |      |      | N | N | N | -10 | -5  | -7  |
| NCGC00015389-08 | PROPOFOL                                | -4.5 | -4.5 |      | N | N | N | 3   |     |     |
| NCGC00015397-02 | Ethamivan                               |      |      |      | N | N | N | 7   | 3   | 3   |

|                 |                                                |  |      |      |   |   |   |     |     |     |
|-----------------|------------------------------------------------|--|------|------|---|---|---|-----|-----|-----|
| NCGC00015397-06 | Vanillic acid diethylamide                     |  |      |      | N | N | N | 6   | 7   | 2   |
| NCGC00015409-02 | Edrophonium chloride                           |  |      | -4.5 | N | N | N | -8  | 4   |     |
| NCGC00015410-04 | EFAROXAN                                       |  |      |      | N | N | N | -16 | -3  | -9  |
| NCGC00015429-08 | FELBAMATE                                      |  | -4.5 |      | N | N | N | 1   |     | -2  |
| NCGC00015439-06 | FLUMAZENIL                                     |  | -4.5 |      | N | N | N |     | 5   | 9   |
| NCGC00015443-06 | FLECAINIDE                                     |  |      | -4.5 | N | N | N | 12  | 13  |     |
| NCGC00015446-05 | FAMOTIDINE                                     |  |      | -4.5 | N | N | N | 0   | 3   |     |
| NCGC00015452-09 | Flutamide                                      |  |      |      | N | N | N | 4   | 4   | 4   |
| NCGC00015455-03 | Felodipine                                     |  |      |      | N | N | N | -11 | -7  | -20 |
| NCGC00015466-08 | Gabapentin                                     |  |      | -4.5 | N | N | N | 1   |     |     |
| NCGC00015513-04 | HISTAMINE                                      |  |      | -4.5 | N | N | N | 7   |     |     |
| NCGC00015520-03 | HYDROXYUREA                                    |  | -4.5 |      | N | N | N |     | 7   | 6   |
| NCGC00015523-02 | Hydroquinone                                   |  |      |      | N | N | N | -18 | -13 | -21 |
| NCGC00015529-09 | Ibuprofen                                      |  |      |      | N | N | N | 15  | 12  | 18  |
| NCGC00015547-02 | Imazodan                                       |  |      | -4.5 | N | N | N | 1   | 4   |     |
| NCGC00015558-06 | ISOPROTERENOL                                  |  |      |      | N | N | N | -1  | -12 | -11 |
| NCGC00015570-04 | IMILOXAN                                       |  | -4.5 | -4.5 | N | N | N | 6   |     |     |
| NCGC00015611-10 | LIDOCAINE                                      |  |      |      | N | N | N | 7   | 12  | 9   |
| NCGC00015656-06 | MIANSERIN                                      |  |      |      | N | N | N | 8   | 15  | 11  |
| NCGC00015661-02 | Molsidomine                                    |  |      | -4.5 | N | N | N | 7   |     | 5   |
| NCGC00015678-02 | Moxisylyte hydrochloride                       |  | -4.5 |      | N | N | N |     | 7   | 10  |
| NCGC00015705-04 | MEMANTINE                                      |  |      |      | N | N | N | 8   | 11  | -12 |
| NCGC00015718-06 | NAFTOPIDIL                                     |  |      | -4.5 | N | N | N | -11 | -1  |     |
| NCGC00015724-10 | NIFLUMIC ACID                                  |  |      | -4.5 | N | N | N | 9   | 2   |     |
| NCGC00015741-06 | MASOPROCOL                                     |  |      | -4.5 | N | N | N | 4   |     | 17  |
| NCGC00015748-11 | NIFEDIPINE                                     |  |      |      | N | N | N | -1  | -6  | -16 |
| NCGC00015754-08 | Nilutamide                                     |  |      | -4.5 | N | N | N | 4   | 14  |     |
| NCGC00015755-03 | NIMUSTINE                                      |  | -4.5 |      | N | N | N |     | 7   | 3   |
| NCGC00015766-08 | OXYMETAZOLINE                                  |  |      |      | N | N | N | -15 | -6  | -24 |
| NCGC00015768-02 | Oxiracetam                                     |  |      |      | N | N | N | -5  | -13 | -12 |
| NCGC00015786-11 | PINDOLOL                                       |  |      | -4.5 | N | N | N | -2  | 13  |     |
| NCGC00015801-02 | Pentoxifylline                                 |  |      | -4.5 | N | N | N | 0   | 1   |     |
| NCGC00015806-03 | Pirfenidone                                    |  | -4.5 |      | N | N | N |     | 5   | -5  |
| NCGC00015810-02 | Papaverine hydrochloride                       |  |      |      | N | N | N | 0   | -4  | -8  |
| NCGC00015817-05 | PROMETHAZINE                                   |  |      | -4.5 | N | N | N | 7   | 16  |     |
| NCGC00015823-02 | Piroxicam                                      |  |      |      | N | N | N | -3  | -9  | -7  |
| NCGC00015824-07 | 3-n-PROPYLXANTHINE                             |  |      |      | N | N | N | 10  | 28  | 14  |
| NCGC00015827-06 | PENTYLENETETRAZOLE                             |  | -4.5 |      | N | N | N |     | 4   | 6   |
| NCGC00015833-09 | Pyrazinamide                                   |  | -4.5 |      | N | N | N |     | 9   | 0   |
| NCGC00015834-11 | PRIMIDONE                                      |  | -4.5 |      | N | N | N |     | 8   | 6   |
| NCGC00015841-02 | Pargyline hydrochloride                        |  | -4.5 |      | N | N | N |     | 7   | 7   |
| NCGC00015857-05 | PIRIBEDIL                                      |  |      |      | N | N | N | -4  | 0   | 2   |
| NCGC00015861-04 | PROPENTOFYLLINE                                |  |      |      | N | N | N | 6   | -2  | 2   |
| NCGC00015864-02 | Procaine hydrochloride                         |  | -4.5 |      | N | N | N |     | 6   | 4   |
| NCGC00015876-07 | RANITIDINE                                     |  |      |      | N | N | N | 9   | 8   | 7   |
| NCGC00015877-06 | Ritanserin                                     |  |      |      | N | N | N | -22 | -24 | -25 |
| NCGC00015884-09 | RILMENIDINE                                    |  |      | -4.5 | N | N | N | -1  | -6  |     |
| NCGC00015894-02 | Resveratrol                                    |  |      |      | N | N | N | -12 | -18 | -23 |
| NCGC00015931-04 | SR 57227A                                      |  |      | -4.5 | N | N | N | -3  | 2   |     |
| NCGC00015947-02 | Siguazodan                                     |  | -4.5 |      | N | N | N | 6   |     | 6   |
| NCGC00015954-02 | Sobuzoxane                                     |  | -4.5 | -4.5 | N | N | N | 3   |     |     |
| NCGC00015955-09 | SALBUTAMOL                                     |  |      | -4.5 | N | N | N | 4   | -2  |     |
| NCGC00015959-03 | Sanguinarine                                   |  | -4.5 |      | N | N | N |     | 12  | 4   |
| NCGC00015970-02 | Sulindac                                       |  |      | -4.5 | N | N | N | -11 |     | -13 |
| NCGC00015982-05 | 4,5,6,7-TETRAHYDROISOXAZOLO[5,4-c]PYRIDIN-3-OL |  |      |      | N | N | N | -3  | 1   | 6   |
| NCGC00015984-03 | TROPISETRON                                    |  |      |      | N | N | N | 8   | 20  | 4   |
| NCGC00015987-05 | TELENZEPINE                                    |  |      | -4.5 | N | N | N | 1   | 17  |     |
| NCGC00015989-09 | (+/-)-Thalidomide                              |  | -4.5 | -4.5 | N | N | N | -3  |     |     |
| NCGC00015996-02 | Tiaprider hydrochloride                        |  | -4.5 |      | N | N | N | 0   |     | 0   |
| NCGC00015997-06 | TAURINE                                        |  |      |      | N | N | N | 14  | -1  | 7   |
| NCGC00015999-10 | TOLBUTAMIDE                                    |  |      | -4.5 | N | N | N | -2  | -1  |     |
| NCGC00016000-08 | Disulfiram                                     |  |      |      | N | N | N | -9  | -10 | -17 |
| NCGC00016023-11 | Theobromine                                    |  |      |      | N | N | N | 7   | -3  | 9   |
| NCGC00016047-03 | TRIM                                           |  |      | -4.5 | N | N | N | 4   | 8   |     |

|                 |                                                    |      |      |      |   |   |   |     |     |     |
|-----------------|----------------------------------------------------|------|------|------|---|---|---|-----|-----|-----|
| NCGC00016056-02 | Tomoxetine                                         | -4.5 |      |      | N | N | N |     | -1  | 1   |
| NCGC00016058-05 | MDL-72222                                          |      |      |      | N | N | N | -7  | -16 | -15 |
| NCGC00016064-04 | Terfenadine                                        |      |      |      | N | N | N | -6  | 2   | 0   |
| NCGC00016064-06 | TERFENADINE                                        | -4.5 |      |      | N | N | N | -2  |     | -13 |
| NCGC00016065-07 | TROPICAMIDE                                        | -4.5 |      |      | N | N | N |     | 1   | 4   |
| NCGC00016087-06 | VIGABATRIN                                         | -4.5 |      |      | N | N | N |     | 7   | -1  |
| NCGC00016089-05 | Nonanamide, N-[(4-hydroxy-3-methoxyphenyl)methyl]- | -4.5 |      |      | N | N | N |     | 5   | 8   |
| NCGC00016101-02 | Xylometazoline hydrochloride                       |      |      |      | N | N | N | -10 | -13 | -8  |
| NCGC00016161-03 | LORGLUMIDE SODIUM                                  | -4.5 |      |      | N | N | N | 6   |     | -1  |
| NCGC00016193-02 | PEMPIDINE TARTRATE                                 |      |      |      | N | N | N | -4  | 6   | 4   |
| NCGC00016227-01 | Tiratricol, 3,3',5-triiodothyroacetic acid         |      | -4.5 |      | N | N | N | 10  | 11  |     |
| NCGC00016239-01 | Methantheline bromide                              |      |      |      | N | N | N | -5  | -7  | -9  |
| NCGC00016240-01 | Nadide                                             | -4.5 |      |      | N | N | N |     | 6   | 4   |
| NCGC00016243-01 | Idoxuridine                                        | -4.5 |      |      | N | N | N |     | 4   | 6   |
| NCGC00016251-08 | Probenecid                                         |      | -4.5 |      | N | N | N | 6   | 8   |     |
| NCGC00016252-01 | Sulfaguanidine                                     | -4.5 |      |      | N | N | N |     | -3  | 6   |
| NCGC00016254-01 | Testosterone propionate                            | -4.5 | -4.5 |      | N | N | N | -2  |     |     |
| NCGC00016257-04 | 4-Dimethylaminoantipyrine                          |      |      |      | N | N | N | 11  | 9   | 12  |
| NCGC00016267-01 | Isocarboxazid                                      | -4.5 |      |      | N | N | N | 3   |     | 2   |
| NCGC00016271-01 | Tolazoline hydrochloride                           | -4.5 |      |      | N | N | N |     | 6   | 2   |
| NCGC00016273-01 | Methimazole                                        |      |      |      | N | N | N | 0   | -1  | 1   |
| NCGC00016277-01 | Niridazole                                         | -4.5 |      |      | N | N | N | -12 |     | -10 |
| NCGC00016278-07 | Mefenamic acid                                     |      |      |      | N | N | N | 5   | -4  | -1  |
| NCGC00016279-01 | Aminohippuric acid                                 |      | -4.5 |      | N | N | N | -5  | 1   |     |
| NCGC00016281-06 | Phenacetin                                         | -4.5 | -4.5 |      | N | N | N | 1   |     |     |
| NCGC00016282-01 | Methacholine chloride                              |      | -4.5 |      | N | N | N | 0   | 8   |     |
| NCGC00016289-01 | Chlortetracycline hydrochloride                    | -4.5 |      |      | N | N | N | -14 |     | -22 |
| NCGC00016292-01 | Deoxycorticosterone                                |      |      |      | N | N | N | 0   | -6  | -4  |
| NCGC00016296-01 | Dicumarol                                          |      | -4.5 |      | N | N | N | -11 | 5   |     |
| NCGC00016309-02 | Sulfathiazole                                      | -4.5 | -4.5 |      | N | N | N | -5  |     |     |
| NCGC00016311-10 | PHENTOLAMINE                                       |      |      |      | N | N | N | 2   | -8  | -9  |
| NCGC00016314-01 | Mepenzolate bromide                                |      |      |      | N | N | N | -2  | 3   | 5   |
| NCGC00016315-02 | PYRITHYLDIONE                                      | -4.5 |      |      | N | N | N |     | 3   | 5   |
| NCGC00016317-01 | Chlorthalidone                                     |      |      |      | N | N | N | 0   | 0   | 3   |
| NCGC00016320-01 | Ethosuximide                                       |      |      |      | N | N | N | 2   | 0   | -9  |
| NCGC00016323-01 | Sulfachloropyridazine                              |      |      |      | N | N | N | 0   | 2   | 7   |
| NCGC00016324-01 | Sulfamethoxypyridazine                             |      | -4.5 |      | N | N | N | 3   | 3   |     |
| NCGC00016337-02 | PTHALYLSULFATHIAZOLE                               | -4.5 | -4.5 |      | N | N | N | -6  |     | -8  |
| NCGC00016340-01 | Ethotoin                                           | -4.5 |      |      | N | N | N |     | -1  | -2  |
| NCGC00016345-01 | Hymecromone                                        |      |      |      | N | N | N | 2   | 16  | 3   |
| NCGC00016346-01 | Sparteine (-)                                      | -4.5 | -4.5 |      | N | N | N | 0   |     |     |
| NCGC00016351-01 | (+,-)-Synephrine                                   | -4.5 |      |      | N | N | N |     | 11  | 13  |
| NCGC00016352-01 | Benzocaine                                         | -4.5 | -4.5 |      | N | N | N | 5   |     |     |
| NCGC00016354-03 | Butylparaben                                       |      | -4.5 |      | N | N | N | 3   | 7   |     |
| NCGC00016357-01 | Iopanoic acid                                      | -4.5 |      |      | N | N | N | 7   |     | 5   |
| NCGC00016358-01 | Allantoin                                          |      |      |      | N | N | N | 1   | 8   | -5  |
| NCGC00016361-07 | Acetaminophen (4-hydroxyacetanilide)               |      | -4.5 |      | N | N | N | 6   | 2   |     |
| NCGC00016371-01 | Dichlorphenamide                                   | -4.5 |      |      | N | N | N | 2   |     | 3   |
| NCGC00016375-01 | Sulfadimethoxine                                   |      | -4.5 |      | N | N | N | 6   | 6   |     |
| NCGC00016379-01 | Glutethimide, para-amino                           |      |      |      | N | N | N | 1   | 9   | 14  |
| NCGC00016382-01 | Oxethazaine                                        |      | -4.5 |      | N | N | N | -9  | 0   |     |
| NCGC00016383-01 | Trimethadione                                      |      |      |      | N | N | N | -4  | -4  | -2  |
| NCGC00016384-10 | Sulfisoxazole diolamine                            | -4.5 |      |      | N | N | N |     | -2  | -1  |
| NCGC00016385-01 | Sulfabenzamide                                     | -4.5 |      |      | N | N | N |     | 16  | 5   |
| NCGC00016387-02 | Chenodiol                                          |      | -4.5 |      | N | N | N | 0   |     | 9   |
| NCGC00016388-01 | Noscapine                                          |      | -4.5 |      | N | N | N | -10 |     | -10 |
| NCGC00016389-01 | Oxyphenbutazone                                    |      | -4.5 | -4.5 | N | N | N | 1   |     |     |
| NCGC00016391-05 | Iodochlorohydroxyquinoline                         | -4.5 |      |      | N | N | N |     | -7  | 4   |
| NCGC00016394-07 | Oxybenzone                                         |      |      |      | N | N | N | 6   | 4   | -18 |
| NCGC00016397-01 | Benzylamine hydrochloride                          |      |      |      | N | N | N | -5  | -10 | -6  |
| NCGC00016403-01 | Mafenide hydrochloride                             |      | -4.5 |      | N | N | N | -3  | -2  |     |
| NCGC00016407-05 | Sulfamethizole                                     |      | -4.5 | -4.5 | N | N | N | 2   |     |     |
| NCGC00016408-01 | Sulfapyridine                                      | -4.5 |      |      | N | N | N |     | 4   | -6  |
| NCGC00016413-01 | Dydrogesterone                                     | -4.5 |      |      | N | N | N |     | -4  | -10 |

|                 |                                               |      |      |   |   |   |     |     |     |
|-----------------|-----------------------------------------------|------|------|---|---|---|-----|-----|-----|
| NCGC00016414-01 | Acenocoumarol                                 | -4.5 | -4.5 | N | N | N | -3  |     |     |
| NCGC00016416-01 | Phenylpropanolamine hydrochloride             |      |      | N | N | N | -3  | -17 | 4   |
| NCGC00016418-07 | Methoxsalen                                   |      |      | N | N | N | -3  | 11  | 7   |
| NCGC00016421-01 | Cyclizine hydrochloride                       |      |      | N | N | N | 4   | 11  | 7   |
| NCGC00016436-01 | Fluocinonide                                  |      |      | N | N | N | 0   | 1   | -11 |
| NCGC00016442-01 | Fluorometholone                               | -4.5 |      | N | N | N | 3   |     | 1   |
| NCGC00016446-06 | METRONIDAZOLE                                 |      |      | N | N | N | 1   | -2  | -1  |
| NCGC00016447-01 | Proscillaridin A                              | -4.5 | -4.5 | N | N | N | 0   |     |     |
| NCGC00016448-01 | Hecogenin                                     |      |      | N | N | N | 3   | 7   | 8   |
| NCGC00016455-01 | Diprophylline                                 | -4.5 |      | N | N | N |     | 6   | -9  |
| NCGC00016461-01 | alpha-Santonin                                | -4.5 |      | N | N | N |     | -9  | -5  |
| NCGC00016479-06 | 7-(beta-HYDROXYETHYL)THEOPHYLLINE             | -4.5 | -4.5 | N | N | N | 6   |     |     |
| NCGC00016481-01 | Hesperidin                                    |      |      | N | N | N | -3  | 10  | 13  |
| NCGC00016483-01 | Trimipramine maleate salt                     | -4.5 | -4.5 | N | N | N | 0   |     |     |
| NCGC00016490-06 | FLUFENAMIC ACID                               |      | -4.5 | N | N | N | 4   | 6   |     |
| NCGC00016491-01 | Esculin Hydrate                               |      |      | N | N | N | 1   | -1  | -6  |
| NCGC00016498-01 | Dyclonine hydrochloride                       | -4.5 | -4.5 | N | N | N | -1  |     |     |
| NCGC00016505-01 | Propoxycaine hydrochloride                    |      |      | N | N | N | 1   | -8  | -11 |
| NCGC00016509-01 | Trimethobenzamide hydrochloride               | -4.5 |      | N | N | N |     | 5   | 7   |
| NCGC00016516-01 | Megestrol acetate                             | -4.5 |      | N | N | N |     | -5  | -15 |
| NCGC00016521-01 | Proxiphylline                                 |      |      | N | N | N | 9   | 0   | 0   |
| NCGC00016522-05 | Bisacodyl                                     |      | -4.5 | N | N | N | 0   | 4   |     |
| NCGC00016527-01 | Cloпамide                                     |      |      | N | N | N | -3  | 1   | 7   |
| NCGC00016530-01 | Sulfameter                                    | -4.5 |      | N | N | N | 1   |     | 6   |
| NCGC00016533-05 | Sulfamethoxazole                              |      | -4.5 | N | N | N | -3  | 2   |     |
| NCGC00016535-01 | Alprostadiol                                  | -4.5 |      | N | N | N | 1   |     | -2  |
| NCGC00016543-01 | Phenformin hydrochloride                      | -4.5 | -4.5 | N | N | N | -19 |     | -13 |
| NCGC00016547-06 | Clofibrilic_acid                              | -4.5 |      | N | N | N |     | 6   | 1   |
| NCGC00016548-01 | Chlorphensin carbamate                        |      |      | N | N | N | -4  | 5   | 5   |
| NCGC00016549-01 | Dosulepin hydrochloride                       | -4.5 |      | N | N | N |     | 2   | -8  |
| NCGC00016561-01 | Meticrane                                     |      | -4.5 | N | N | N | 9   |     | 2   |
| NCGC00016569-01 | Tranexamic acid                               | -4.5 |      | N | N | N |     | 6   | 6   |
| NCGC00016570-01 | Mephentermine hemisulfate                     | -4.5 |      | N | N | N |     | 10  | 5   |
| NCGC00016575-01 | Colistin sulfate                              |      | -4.5 | N | N | N | 6   | 14  |     |
| NCGC00016580-01 | Vancomycin hydrochloride                      |      |      | N | N | N | 6   | 9   | 4   |
| NCGC00016582-01 | Bacitracin                                    | -4.5 |      | N | N | N |     | 5   | 6   |
| NCGC00016590-01 | Azaperone                                     |      |      | N | N | N | 5   | 11  | 3   |
| NCGC00016599-01 | Flucytosine                                   | -4.5 | -4.5 | N | N | N | 5   |     | 11  |
| NCGC00016604-01 | Flumethasone                                  | -4.5 |      | N | N | N |     | 7   | 8   |
| NCGC00016609-01 | Epitostanol                                   |      |      | N | N | N | 2   | 9   | 17  |
| NCGC00016610-01 | Tolnaftate                                    |      |      | N | N | N | -2  | -3  | 3   |
| NCGC00016612-01 | Sulfadoxine                                   |      | -4.5 | N | N | N | 2   | 1   |     |
| NCGC00016620-01 | Midodrine hydrochloride                       |      |      | N | N | N | 3   | 9   | 6   |
| NCGC00016623-01 | Moroxidine hydrochloride                      | -4.5 |      | N | N | N | 0   |     | -2  |
| NCGC00016627-01 | Lidoflazine                                   |      |      | N | N | N | -6  | -21 | -23 |
| NCGC00016629-01 | Cyclacillin                                   |      |      | N | N | N | 3   | 6   | 3   |
| NCGC00016630-01 | Clidinium bromide                             |      |      | N | N | N | -10 | 2   | -11 |
| NCGC00016636-01 | Flavoxate hydrochloride                       | -4.5 | -4.5 | N | N | N | 2   |     |     |
| NCGC00016642-01 | Piperacetazine                                |      |      | N | N | N | -10 | -10 | -15 |
| NCGC00016643-01 | Trioxsalen                                    |      |      | N | N | N | 0   | 20  | 24  |
| NCGC00016646-02 | BROMOPRIDE                                    |      |      | N | N | N | -9  | -2  | -13 |
| NCGC00016649-01 | Atropine-N-oxide hydrochloride                |      |      | N | N | N | -5  | -3  | -5  |
| NCGC00016651-03 | SPAGLUMIC ACID                                |      | -4.5 | N | N | N | 11  | 13  |     |
| NCGC00016657-01 | Cefalonium                                    | -4.5 |      | N | N | N | 4   |     | 0   |
| NCGC00016662-01 | Metaproterenol sulfate, orciprenaline sulfate |      |      | N | N | N | 6   | 8   | 3   |
| NCGC00016669-01 | Scopolamin-N-oxide hydrobromide               |      | -4.5 | N | N | N | 0   | 7   |     |
| NCGC00016680-01 | Oleandomycin phosphate                        | -4.5 |      | N | N | N | -1  |     | -2  |
| NCGC00016681-01 | Methotrimeprazine maleate salt                | -4.5 |      | N | N | N | -8  |     | -15 |
| NCGC00016685-05 | RONIDAZOLE                                    |      |      | N | N | N | 4   | 3   | 16  |
| NCGC00016686-01 | Natamycin                                     |      |      | N | N | N | 6   | 17  | 11  |
| NCGC00016688-02 | TOCOPHEROL ACETATE                            | -4.5 | -4.5 | N | N | N | -1  |     |     |
| NCGC00016690-01 | Tribenoside                                   | -4.5 | -4.5 | N | N | N | -10 |     |     |
| NCGC00016697-01 | Trimetazidine dihydrochloride                 |      | -4.5 | N | N | N | 1   | -5  |     |
| NCGC00016701-01 | Azapropazone                                  |      |      | N | N | N | 4   | 11  | 15  |



|                 |                                |      |      |      |  |  |  |     |     |     |
|-----------------|--------------------------------|------|------|------|--|--|--|-----|-----|-----|
| NCGC00016709-01 | Benserazide hydrochloride      |      |      |      |  |  |  | 2   | 11  |     |
| NCGC00016711-01 | Cloperastine hydrochloride     |      |      |      |  |  |  | -10 | -16 | -21 |
| NCGC00016712-01 | Alcuronium chloride            | -4.5 |      |      |  |  |  |     | 6   | 15  |
| NCGC00016715-01 | Trapidil                       |      | -4.5 |      |  |  |  | -2  | 6   |     |
| NCGC00016720-01 | Iocetamic acid                 |      | -4.5 |      |  |  |  | 7   |     | 4   |
| NCGC00016721-01 | Fenoterol hydrobromide         |      | -4.5 | -4.5 |  |  |  | 3   |     |     |
| NCGC00016723-01 | Ornidazole                     |      |      | -4.5 |  |  |  | 4   | 9   |     |
| NCGC00016738-01 | Streptozotocin                 |      |      |      |  |  |  | -1  | 6   | 4   |
| NCGC00016741-01 | Tinidazole                     |      |      | -4.5 |  |  |  | 0   | 10  |     |
| NCGC00016743-01 | Piromidic acid                 | -4.5 |      |      |  |  |  |     | -5  | 5   |
| NCGC00016758-01 | Guanadrel sulfate              |      | -4.5 |      |  |  |  | -2  |     | 2   |
| NCGC00016760-01 | Carbimazole                    |      |      | -4.5 |  |  |  | -4  | 13  |     |
| NCGC00016767-02 | ETANIDAZOLE                    |      | -4.5 |      |  |  |  | 5   |     | 4   |
| NCGC00016773-01 | Ritodrine hydrochloride        |      |      |      |  |  |  | 7   | 8   | 7   |
| NCGC00016774-01 | Nifurtimox                     |      |      |      |  |  |  | 5   | -9  | -16 |
| NCGC00016778-01 | Nefopam hydrochloride          |      | -4.5 | -4.5 |  |  |  | -1  |     |     |
| NCGC00016781-04 | AMBROXOL HYDROCHLORIDE         |      |      | -4.5 |  |  |  | 1   | 6   |     |
| NCGC00016783-01 | Alfadolone acetate             |      | -4.5 | -4.5 |  |  |  | 4   |     |     |
| NCGC00016794-09 | Gemfibrozil                    |      |      |      |  |  |  | 6   | -5  | 2   |
| NCGC00016799-01 | Suxibuzone                     |      |      |      |  |  |  | 1   | -1  | 0   |
| NCGC00016801-01 | (-) -Levobunolol hydrochloride | -4.5 |      |      |  |  |  |     | -4  | -5  |
| NCGC00016804-01 | Etofenamate                    |      |      |      |  |  |  | 5   | 16  | 11  |
| NCGC00016807-01 | Bupropion hydrochloride        | -4.5 |      |      |  |  |  |     | 3   | -7  |
| NCGC00016814-01 | Tobramycin                     |      | -4.5 |      |  |  |  | -2  |     | 7   |
| NCGC00016815-01 | Tiaprofenic acid               |      | -4.5 | -4.5 |  |  |  | 3   |     |     |
| NCGC00016819-01 | Gliquidone                     |      |      | -4.5 |  |  |  | 7   | -3  |     |
| NCGC00016827-01 | Acebutolol hydrochloride       | -4.5 |      |      |  |  |  |     | 7   | 10  |
| NCGC00016829-05 | ISOXICAM                       |      | -4.5 |      |  |  |  | -7  |     | -1  |
| NCGC00016834-01 | Fenbufen                       |      |      |      |  |  |  | 5   | 2   | 1   |
| NCGC00016836-01 | Apramycin                      |      | -4.5 | -4.5 |  |  |  | 2   |     |     |
| NCGC00016837-01 | Bacampicillin hydrochloride    |      |      |      |  |  |  | 1   | 0   | 5   |
| NCGC00016849-01 | Etodolac                       |      |      | -4.5 |  |  |  | -1  | 4   |     |
| NCGC00016850-01 | Bezafibrate                    |      | -4.5 | -4.5 |  |  |  | 3   |     |     |
| NCGC00016851-01 | Nadolol                        | -4.5 |      |      |  |  |  |     | 1   | -5  |
| NCGC00016855-01 | Fenbendazole                   |      |      | -4.5 |  |  |  | -5  | -2  |     |
| NCGC00016856-01 | Rimexolone                     |      |      |      |  |  |  | -16 | -12 | -22 |
| NCGC00016860-01 | Butirosin disulfate salt       |      |      | -4.5 |  |  |  | 5   | 8   |     |
| NCGC00016866-01 | Pipemidic acid                 |      |      |      |  |  |  | 1   | 6   | 2   |
| NCGC00016871-01 | Ribostamycin sulfate salt      | -4.5 |      |      |  |  |  |     | 10  | 5   |
| NCGC00016872-06 | TICLOPIDINE                    |      | -4.5 |      |  |  |  | -18 |     | -3  |
| NCGC00016876-01 | Albendazole                    |      |      |      |  |  |  | 8   | -1  | -5  |
| NCGC00016878-01 | Piretanide                     | -4.5 |      |      |  |  |  |     | 5   | 6   |
| NCGC00016881-01 | Netilmicin sulfate             |      |      |      |  |  |  | 8   | 19  | 0   |
| NCGC00016886-01 | Ioxaglic acid                  |      | -4.5 | -4.5 |  |  |  | -4  |     |     |
| NCGC00016889-01 | Tenoxicam                      |      |      |      |  |  |  | 0   | -1  | -2  |
| NCGC00016892-01 | Iopamidol                      |      |      | -4.5 |  |  |  | 1   | 8   |     |
| NCGC00016899-01 | Rolipram                       |      |      |      |  |  |  | -9  | -13 | -17 |
| NCGC00016902-01 | Etifenin                       | -4.5 |      |      |  |  |  |     | 6   | 5   |
| NCGC00016903-01 | Terazosin hydrochloride        | -4.5 |      |      |  |  |  |     | 3   | 5   |
| NCGC00016908-01 | Naftifine hydrochloride        |      |      |      |  |  |  | -1  | 1   | 0   |
| NCGC00016914-01 | Cefotetan                      |      |      |      |  |  |  | -2  | 4   | 4   |
| NCGC00016923-01 | Iopromide                      | -4.5 |      |      |  |  |  |     | 8   | 7   |
| NCGC00016925-06 | Omeprazole                     |      |      |      |  |  |  | -8  | -15 | -1  |
| NCGC00016926-01 | Prednicarbate                  |      |      | -4.5 |  |  |  | 3   | 7   |     |
| NCGC00016928-01 | Imipenem                       |      |      |      |  |  |  | 5   | 10  | 2   |
| NCGC00016934-01 | Nizatidine                     | -4.5 |      |      |  |  |  |     | 6   | 6   |
| NCGC00016939-01 | Levocabastine hydrochloride    |      |      | -4.5 |  |  |  | 1   | -3  |     |
| NCGC00016945-01 | Racecadotril                   |      |      | -4.5 |  |  |  | -8  | 0   |     |
| NCGC00016946-01 | Alfuzosin hydrochloride        |      | -4.5 | -4.5 |  |  |  | -2  |     |     |
| NCGC00016947-01 | Bambuterol hydrochloride       | -4.5 |      |      |  |  |  |     | 9   | 1   |
| NCGC00016948-01 | Ofloxacin                      |      | -4.5 |      |  |  |  | -29 |     | 5   |
| NCGC00016949-01 | Cetirizine dihydrochloride     |      |      |      |  |  |  | -1  | -15 | -13 |
| NCGC00016955-01 | Ramipril                       |      | -4.5 |      |  |  |  | 6   |     | 1   |
| NCGC00016957-01 | Aceclofenac                    |      | -4.5 |      |  |  |  | 0   |     | -2  |

|                 |                                                               |      |      |      |   |   |   |     |     |     |
|-----------------|---------------------------------------------------------------|------|------|------|---|---|---|-----|-----|-----|
| NCGC00016958-01 | Iodixanol                                                     | -4.5 |      |      | N | N | N |     | 9   | 0   |
| NCGC00016962-01 | Meropenem                                                     | -4.5 |      |      | N | N | N |     | -4  | 3   |
| NCGC00016965-01 | Finasteride                                                   |      | -4.5 |      | N | N | N |     | 0   |     |
| NCGC00016979-01 | Brinzolamide                                                  |      | -4.5 |      | N | N | N | -10 |     |     |
| NCGC00017004-01 | Tiletamine hydrochloride                                      |      | -4.5 |      | N | N | N | 1   | 6   |     |
| NCGC00017005-01 | Tocainide hydrochloride                                       |      | -4.5 |      | N | N | N | 3   | 5   |     |
| NCGC00017009-01 | Pentolinium bitartrate                                        |      |      |      | N | N | N | 2   | -7  | 8   |
| NCGC00017010-01 | Methylatropine nitrate                                        | -4.5 |      |      | N | N | N |     | -1  | 3   |
| NCGC00017013-01 | Thiamine hydrochloride                                        |      | -4.5 |      | N | N | N | 0   |     | 1   |
| NCGC00017014-01 | Prenylamine lactate                                           |      |      |      | N | N | N | -6  | -15 | -16 |
| NCGC00017018-01 | Merbromin                                                     |      |      |      | N | N | N | 16  | 28  | 17  |
| NCGC00017019-01 | Phenethicillin potassium salt                                 |      |      |      | N | N | N | 1   | 0   | 1   |
| NCGC00017021-01 | Deferoxamine mesylate                                         | -4.5 |      |      | N | N | N |     | 7   | -15 |
| NCGC00017025-01 | Bergenin monohydrate                                          |      |      |      | N | N | N | -1  | 11  | 12  |
| NCGC00017029-01 | Cloxacillin sodium salt                                       |      |      |      | N | N | N | 0   | -2  | 1   |
| NCGC00017030-01 | Fusidic acid sodium salt                                      |      | -4.5 | -4.5 | N | N | N | 7   |     |     |
| NCGC00017034-01 | Diethylcarbamazine citrate                                    | -4.5 |      |      | N | N | N |     | 8   | 9   |
| NCGC00017037-01 | Oxalamine citrate salt                                        |      | -4.5 |      | N | N | N | -1  |     | -1  |
| NCGC00017039-01 | Deptropine citrate                                            |      |      |      | N | N | N | -17 | -6  | -6  |
| NCGC00017041-01 | Ethamsylate                                                   |      | -4.5 | -4.5 | N | N | N | 5   |     |     |
| NCGC00017043-02 | Benzyl diethyl ((2,6-xylylcarbamoyl)methyl) ammonium benzoate |      | -4.5 |      | N | N | N | 5   |     | -6  |
| NCGC00017048-01 | Levopropoxyphene napsylate                                    |      |      |      | N | N | N | 4   | -1  | 1   |
| NCGC00017056-01 | Quercetin dihydrate                                           |      |      |      | N | N | N | -4  | -13 | -10 |
| NCGC00017066-01 | Dextromethorphan hydrobromide monohydrate                     |      |      |      | N | N | N | 0   | 8   | 2   |
| NCGC00017073-01 | Carbenoxolone disodium salt                                   | -4.5 |      |      | N | N | N |     | 8   | 13  |
| NCGC00017097-01 | (R) -Naproxen sodium salt                                     |      | -4.5 |      | N | N | N | 3   |     | 5   |
| NCGC00017101-01 | Cefamandole sodium salt                                       | -4.5 |      |      | N | N | N |     | 4   | 7   |
| NCGC00017104-01 | Metaraminol bitartrate                                        |      |      |      | N | N | N | 6   | 7   | -1  |
| NCGC00017106-01 | Azlocillin sodium salt                                        | -4.5 |      |      | N | N | N |     | 18  | 11  |
| NCGC00017108-01 | Dinoprost trometamol                                          | -4.5 |      |      | N | N | N |     | 3   | 9   |
| NCGC00017115-01 | Thiethylperazine malate                                       |      |      |      | N | N | N | -5  | -6  | -10 |
| NCGC00017116-01 | Fenoprofen calcium salt dihydrate                             |      |      |      | N | N | N | 2   | 0   | 6   |
| NCGC00017117-01 | Bethahistine mesylate                                         |      | -4.5 |      | N | N | N | -5  |     | 0   |
| NCGC00017119-01 | Metoprolol-(+,-) (+)-tartrate salt                            |      |      |      | N | N | N | 12  | 6   | 5   |
| NCGC00017121-01 | Gabexate mesilate                                             |      | -4.5 |      | N | N | N | -10 |     | -10 |
| NCGC00017127-01 | Atracurium besylate                                           |      | -4.5 |      | N | N | N | 1   |     | 5   |
| NCGC00017128-01 | Cefotaxime sodium salt                                        |      |      | -4.5 | N | N | N | 3   | 10  |     |
| NCGC00017129-01 | Tolmetin sodium salt dihydrate                                |      |      |      | N | N | N | 4   | 3   | 4   |
| NCGC00017141-01 | Lisinopril                                                    | -4.5 |      |      | N | N | N |     | 8   | 5   |
| NCGC00017147-01 | Cefepime hydrochloride                                        | -4.5 |      |      | N | N | N |     | 5   | 8   |
| NCGC00017244-03 | ENOXOLONE                                                     |      | -4.5 | -4.5 | N | N | N | 0   |     |     |
| NCGC00017246-02 | PICROTOXIN                                                    |      |      |      | N | N | N | 6   | 1   | 3   |
| NCGC00017258-04 | METHYLERGOMETRINE                                             |      |      |      | N | N | N | 3   | 14  | 16  |
| NCGC00017280-10 | TRETINOIN                                                     |      | -4.5 | -4.5 | N | N | N | 0   |     |     |
| NCGC00017325-03 | KOJIC ACID                                                    |      |      | -4.5 | N | N | N | 4   | 9   |     |
| NCGC00017333-03 | Atropine                                                      |      | -4.5 | -4.5 | N | N | N | 2   |     |     |
| NCGC00017358-05 | Rotenone                                                      |      |      |      | N | N | N | -18 | -12 | -19 |
| NCGC00018097-04 | P-HYDROXYPROPIOPHENONE                                        |      | -4.5 | -4.5 | N | N | N | -1  |     |     |
| NCGC00018100-04 | Fasudil hydrochloride                                         |      | -4.5 |      | N | N | N | -8  |     | -8  |
| NCGC00018117-07 | OXTRIPHYLLINE                                                 |      |      |      | N | N | N | 1   | 1   | 16  |
| NCGC00018140-02 | MIGLUSTAT                                                     |      |      | -4.5 | N | N | N | 3   | 9   |     |
| NCGC00018143-04 | ENROFLOXACIN                                                  |      |      |      | N | N | N | -14 | -24 | -19 |
| NCGC00018164-02 | AZASERINE                                                     |      |      |      | N | N | N | 7   | 14  | -4  |
| NCGC00018167-03 | 2-Chloro-2'-deoxyadenosine                                    | -4.5 |      |      | N | N | N |     | -3  | 2   |
| NCGC00018181-08 | Nalidixic acid                                                | -4.5 |      |      | N | N | N |     | 10  | 8   |
| NCGC00018185-05 | Tranilast                                                     |      |      |      | N | N | N | -12 | -7  | -13 |
| NCGC00018200-07 | Phenolphthalein                                               |      |      |      | N | N | N | 7   | 4   | 9   |
| NCGC00018237-03 | Trichlorfon                                                   |      |      |      | N | N | N | -9  | -21 | -10 |
| NCGC00018241-04 | BETAMIPRON                                                    |      |      | -4.5 | N | N | N | 2   | 4   |     |
| NCGC00018243-07 | Sulfamethazine                                                |      | -4.5 | -4.5 | N | N | N | 1   |     |     |
| NCGC00018249-04 | ETHOXZOLAMIDE                                                 |      |      |      | N | N | N | -14 | -2  | -5  |
| NCGC00018251-03 | METHYL AMINOLEVULINATE HYDROCHLORIDE                          |      |      |      | N | N | N | 1   | -30 | -30 |
| NCGC00018263-02 | HYDROCORTISONE VALERATE                                       |      | -4.5 | -4.5 | N | N | N | 4   |     |     |
| NCGC00018274-04 | DIACERIN                                                      |      | -4.5 |      | N | N | N | -11 |     | -10 |

|                 |                                      |  |  |      |      |   |   |   |     |     |     |
|-----------------|--------------------------------------|--|--|------|------|---|---|---|-----|-----|-----|
| NCGC00018938-03 | DAZOXIBENUM                          |  |  |      | -4.5 | N | N | N | 12  | 3   |     |
| NCGC00021124-04 | BUTETAMATUM                          |  |  |      |      | N | N | N | -1  | 6   | 10  |
| NCGC00021141-04 | PHENYLTOLOXAMINE CITRATE             |  |  | -4.5 |      | N | N | N | -18 |     | -9  |
| NCGC00021142-02 | Cromolyn sodium                      |  |  |      |      | N | N | N | -2  | 8   | -5  |
| NCGC00021222-03 | Cortexolone                          |  |  |      |      | N | N | N | -6  | -16 | -17 |
| NCGC00021301-04 | Fluocinolone acetonide               |  |  |      |      | N | N | N | 1   | -13 | -7  |
| NCGC00021666-03 | NALMEFENE HYDROCHLORIDE              |  |  | -4.5 |      | N | N | N | 6   |     | -1  |
| NCGC00022003-03 | Diflorasone diacetate                |  |  | -4.5 | -4.5 | N | N | N | -9  |     |     |
| NCGC00022043-04 | DESOXYCORTICOSTERONE ACETATE         |  |  |      |      | N | N | N | -3  | -13 | -16 |
| NCGC00022391-04 | Azaribine                            |  |  | -4.5 | -4.5 | N | N | N | 0   |     |     |
| NCGC00022472-05 | Corticosterone                       |  |  |      |      | N | N | N | -5  | -7  | -9  |
| NCGC00022715-03 | 6-Propyl-2-thiouracil                |  |  | -4.5 | -4.5 | N | N | N | 3   |     |     |
| NCGC00022848-06 | HYDROCORTISONE                       |  |  | -4.5 | -4.5 | N | N | N | 0   |     |     |
| NCGC00023100-03 | 5alpha-Pregnan-3alpha-ol-11,20-dione |  |  |      |      | N | N | N | 7   | 1   | 2   |
| NCGC00023193-04 | Triamcinolone acetonide              |  |  |      |      | N | N | N | -10 | -20 | -17 |
| NCGC00023339-09 | PILOCARPINE                          |  |  | -4.5 |      | N | N | N | 1   | 10  |     |
| NCGC00023648-03 | Desoximetasone                       |  |  |      |      | N | N | N | -12 | -26 | -35 |
| NCGC00023654-04 | CAPTOPRIL                            |  |  |      |      | N | N | N | -11 | -2  | -1  |
| NCGC00023673-05 | ADENOSINE                            |  |  |      |      | N | N | N | 0   | 10  | 11  |
| NCGC00023902-06 | ANDROSTENEDIONE                      |  |  | -4.5 |      | N | N | N | -1  | 0   |     |
| NCGC00023945-05 | ZIDOVUDINE                           |  |  | -4.5 |      | N | N | N | 4   | 3   |     |
| NCGC00024027-05 | METHYSERGIDE                         |  |  | -4.5 |      | N | N | N | 3   | 17  |     |
| NCGC00024485-02 | (E)-4-amino-2-butenic acid           |  |  |      |      | N | N | N | 8   | 20  | 13  |
| NCGC00024498-02 | D-ASPARTIC ACID                      |  |  |      |      | N | N | N | 2   | 14  | 18  |
| NCGC00024504-05 | KAINIC ACID                          |  |  | -4.5 | -4.5 | N | N | N | 1   |     |     |
| NCGC00024563-02 | Y-25130                              |  |  |      |      | N | N | N | 8   | 10  | 9   |
| NCGC00024589-02 | CIMATEROL                            |  |  | -4.5 |      | N | N | N | -1  |     | 10  |
| NCGC00024599-02 | CINANSERIN                           |  |  | -4.5 |      | N | N | N | 9   |     | -22 |
| NCGC00024609-01 | Flurofamide                          |  |  | -4.5 |      | N | N | N | 0   |     | -2  |
| NCGC00024714-03 | trans-TRIPROLIDINE                   |  |  |      |      | N | N | N | -7  | -12 | -13 |
| NCGC00024733-02 | ACECLIDINE                           |  |  | -4.5 |      | N | N | N |     | 12  | 0   |
| NCGC00024749-01 | Pirlindole mesylate                  |  |  | -4.5 | -4.5 | N | N | N | -6  |     | -2  |
| NCGC00024810-02 | PRACTOLOL                            |  |  |      | -4.5 | N | N | N | 5   | 0   |     |
| NCGC00024824-01 | Statil                               |  |  |      | -4.5 | N | N | N | 1   | 3   |     |
| NCGC00024842-02 | CHLORMETHIAZOLE                      |  |  |      | -4.5 | N | N | N | 2   | 9   |     |
| NCGC00024853-05 | Levosulpiride                        |  |  |      |      | N | N | N | -2  | 9   | 3   |
| NCGC00024915-02 | SCH 50911                            |  |  |      |      | N | N | N | 8   | 12  | 11  |
| NCGC00024923-02 | ISAMOLTANE                           |  |  |      |      | N | N | N | 12  | 16  | 8   |
| NCGC00024999-02 | PROCATEROL                           |  |  | -4.5 |      | N | N | N |     | -1  | 3   |
| NCGC00025002-02 | AF-DX 116                            |  |  | -4.5 |      | N | N | N | 4   |     | 2   |
| NCGC00025004-02 | GR 103691                            |  |  |      | -4.5 | N | N | N | -1  | 4   |     |
| NCGC00025098-01 | Loreclezole hydrochloride            |  |  |      | -4.5 | N | N | N | 6   | 3   |     |
| NCGC00025125-07 | Colchicine                           |  |  |      |      | N | N | N | 4   | -9  | 4   |
| NCGC00025132-01 | Levcromakalim                        |  |  |      |      | N | N | N | 12  | 5   | 3   |
| NCGC00025172-01 | Linomide                             |  |  | -4.5 |      | N | N | N |     | -1  | 1   |
| NCGC00025188-04 | PINACIDIL                            |  |  |      |      | N | N | N | -6  | 12  | -6  |
| NCGC00025283-01 | Acifran                              |  |  |      | -4.5 | N | N | N | 5   | 13  |     |
| NCGC00025295-01 | Zacopride hydrochloride              |  |  | -4.5 |      | N | N | N |     | 0   | 3   |
| NCGC00025315-01 | Ipsapirone                           |  |  | -4.5 | -4.5 | N | N | N | 1   |     |     |
| NCGC00026132-02 | METANIXINUM                          |  |  | -4.5 |      | N | N | N | -1  |     | 0   |
| NCGC00027930-02 | MOCLOBEMIDE                          |  |  | -4.5 |      | N | N | N |     | -2  | 3   |
| NCGC00037856-01 | MEDRONIC ACID                        |  |  |      |      | N | N | N | 5   | 1   | -12 |
| NCGC00042134-02 | AFALANINUM                           |  |  |      | -4.5 | N | N | N | -3  | 0   |     |
| NCGC00061506-02 | NICOTREDOLUM                         |  |  |      |      | N | N | N | 5   | 10  | 11  |
| NCGC00063561-02 | DIPHENYLIMIDAZOLE                    |  |  | -4.5 |      | N | N | N | -8  |     | -7  |
| NCGC00065890-02 | Nevirapine                           |  |  |      | -4.5 | N | N | N | 0   | -1  |     |
| NCGC00070736-02 | Imiquimod                            |  |  |      |      | N | N | N | -9  | -2  | 3   |
| NCGC00072886-02 | Metralindole                         |  |  |      |      | N | N | N | -4  | -6  | -12 |
| NCGC00073457-03 | METOMIDATE HYDROCHLORIDE             |  |  | -4.5 | -4.5 | N | N | N | -9  |     |     |
| NCGC00080392-01 | Phosmet                              |  |  |      | -4.5 | N | N | N | 1   |     | 1   |
| NCGC00090681-04 | Camphor                              |  |  | -4.5 |      | N | N | N |     | 4   | 8   |
| NCGC00090731-01 | Ethylene glycol monophenyl ether     |  |  |      | -4.5 | N | N | N | 3   | 9   |     |
| NCGC00090739-02 | 1,2-Propylene glycol                 |  |  |      | -4.5 | N | N | N | 3   | 8   |     |
| NCGC00090745-02 | Boric acid                           |  |  |      |      | N | N | N | -1  | 3   | 1   |

|                 |                                          |      |      |      |   |   |   |     |     |     |
|-----------------|------------------------------------------|------|------|------|---|---|---|-----|-----|-----|
| NCGC00090749-04 | Diethylstilbestrol (mixture Z,E isomers) |      |      |      | N | N | N | -8  | 0   | 2   |
| NCGC00090751-01 | Sodium zomepirac                         | -4.5 |      |      | N | N | N | 6   |     | -8  |
| NCGC00090755-02 | POTASSIUM DICHROMATE                     |      |      |      | N | N | N | -12 | -7  | -19 |
| NCGC00090759-01 | cis-Dichlorodiamine platinum             | -4.5 | -4.5 |      | N | N | N | 2   |     |     |
| NCGC00090764-02 | Padimate O                               | -4.5 |      |      | N | N | N |     | 9   | 4   |
| NCGC00090766-01 | Prednisone                               | -4.5 |      |      | N | N | N |     | -12 | -20 |
| NCGC00090767-02 | alpha-Cyclodextrin                       |      |      |      | N | N | N | -1  | 6   | 0   |
| NCGC00090770-05 | Broxuridina                              | -4.5 |      |      | N | N | N |     | 6   | -3  |
| NCGC00090781-02 | Dioctyl phthalate                        | -4.5 |      |      | N | N | N |     | 8   | 7   |
| NCGC00090791-03 | 2',3'-DIDEOXYADENOSINE                   |      |      |      | N | N | N | 1   | -3  | -1  |
| NCGC00090808-01 | Amphotericin B                           |      |      |      | N | N | N | 7   | -1  | -13 |
| NCGC00090814-01 | p-Chlorophenol                           |      |      | -4.5 | N | N | N | -2  | 6   |     |
| NCGC00090820-01 | p-Acetamidobenzoic acid                  |      |      |      | N | N | N | 0   | 5   | 0   |
| NCGC00090825-01 | 1,2-Dichlorobenzene                      | -4.5 | -4.5 |      | N | N | N | 0   |     |     |
| NCGC00090827-02 | o-methoxyphenol                          |      |      |      | N | N | N | 0   | 7   | 3   |
| NCGC00090868-01 | Halothane                                |      |      |      | N | N | N | -1  | -4  | -1  |
| NCGC00090903-01 | Salicylazosulfapyridine                  |      |      |      | N | N | N | -8  | 8   | -6  |
| NCGC00090905-06 | Busulfan                                 | -4.5 | -4.5 |      | N | N | N | 1   |     |     |
| NCGC00090917-01 | 2-Propanol                               | -4.5 |      |      | N | N | N | 1   |     | 3   |
| NCGC00090918-04 | 4-Nonylphenol, branched                  |      |      | -4.5 | N | N | N | 8   | 9   |     |
| NCGC00090921-01 | HEXADIMETHRINI BROMIDUM                  | -4.5 |      |      | N | N | N | 10  |     | 10  |
| NCGC00090939-02 | Toluene                                  | -4.5 |      |      | N | N | N | 3   |     | 4   |
| NCGC00090950-03 | GLYCERIN                                 | -4.5 | -4.5 |      | N | N | N | 0   |     |     |
| NCGC00090957-01 | caprylic acid (octanoic acid)            |      |      |      | N | N | N | -5  | 9   | 2   |
| NCGC00090964-02 | Tetraethylenepentamine                   | -4.5 |      |      | N | N | N |     | 0   | 0   |
| NCGC00090965-03 | Propyl-4-hydroxybenzoate                 |      |      |      | N | N | N | 1   | 11  | 7   |
| NCGC00090972-01 | Lactic acid                              |      |      |      | N | N | N | -1  | 4   | -3  |
| NCGC00090974-03 | Diethyl phthalate                        | -4.5 |      |      | N | N | N | -1  |     | 9   |
| NCGC00090987-02 | 1-Naphthalene acetic acid                |      |      | -4.5 | N | N | N | -1  | 4   |     |
| NCGC00090997-02 | Dichlorvos (Vapona)                      |      |      |      | N | N | N | -6  | -14 | -17 |
| NCGC00091005-01 | phosphoric acid                          | -4.5 |      |      | N | N | N | 6   |     | 2   |
| NCGC00091016-02 | Carbon tetrachloride                     | -4.5 | -4.5 |      | N | N | N | -4  |     |     |
| NCGC00091018-01 | Testosterone                             | -4.5 |      |      | N | N | N | -2  |     | -5  |
| NCGC00091021-02 | Trichloroacetic acid                     | -4.5 | -4.5 |      | N | N | N | 7   |     |     |
| NCGC00091027-01 | Sodium hypochlorite                      |      |      |      | N | N | N | -4  | 8   | 6   |
| NCGC00091031-01 | Meprobamate                              | -4.5 |      |      | N | N | N |     | 1   | 1   |
| NCGC00091049-04 | Linoleic acid                            |      |      | -4.5 | N | N | N | -3  |     | -4  |
| NCGC00091051-01 | p-Amino benzoic acid                     | -4.5 |      |      | N | N | N |     | 8   | -1  |
| NCGC00091066-01 | Isoamyl nitrite                          |      |      |      | N | N | N | 0   | 4   | 6   |
| NCGC00091070-01 | Diisopropyl amine                        | -4.5 |      |      | N | N | N |     | 6   | 4   |
| NCGC00091073-01 | Diazinon                                 |      |      |      | N | N | N | 4   | 15  | 17  |
| NCGC00091076-01 | Acetal (Acetaldehyde diethyl acetal)     |      |      | -4.5 | N | N | N | 0   | 1   |     |
| NCGC00091106-02 | Methyl salicylate                        |      |      |      | N | N | N | 0   | 0   | 2   |
| NCGC00091108-01 | Carbon disulfide                         |      |      |      | N | N | N | 2   | -1  | 11  |
| NCGC00091110-01 | Glutaraldehyde (Glutaric dialdehyde)     | -4.5 |      |      | N | N | N | 3   |     | -5  |
| NCGC00091116-01 | n-Pentane                                | -4.5 | -4.5 |      | N | N | N | 1   |     |     |
| NCGC00091119-02 | Oleic acid                               | -4.5 |      |      | N | N | N | -3  |     | 4   |
| NCGC00091120-01 | Griseofulvin                             | -4.5 | -4.5 |      | N | N | N | 1   |     |     |
| NCGC00091124-02 | METHYLTHIOURACIL                         |      |      | -4.5 | N | N | N | 5   |     | 7   |
| NCGC00091149-01 | Valproic acid                            | -4.5 |      |      | N | N | N |     | 5   | 4   |
| NCGC00091151-01 | Phenoxy acetic acid                      | -4.5 |      |      | N | N | N | 0   |     | 0   |
| NCGC00091162-02 | AMINOTHIAZOLE                            |      |      |      | N | N | N | -9  | 3   | -10 |
| NCGC00091179-01 | Acetone                                  | -4.5 | -4.5 |      | N | N | N | 5   |     |     |
| NCGC00091183-02 | 2,4,6-Tribromophenol                     | -4.5 |      |      | N | N | N |     | -1  | -2  |
| NCGC00091196-01 | 2,4,5-Trichlorophenol                    |      |      | -4.5 | N | N | N | 5   | -1  |     |
| NCGC00091202-01 | Trichloroethylene                        |      |      |      | N | N | N | 7   | 6   | 2   |
| NCGC00091228-01 | Glyoxal                                  |      |      |      | N | N | N | -1  | 4   | 8   |
| NCGC00091251-01 | Azoxybenzene                             |      |      | -4.5 | N | N | N | 7   | 9   |     |
| NCGC00091313-01 | Hexanamide                               | -4.5 | -4.5 |      | N | N | N | 4   |     |     |
| NCGC00091325-05 | Dichlorophen                             | -4.5 |      |      | N | N | N |     | -5  | 2   |
| NCGC00091326-01 | Acetanilide                              |      |      | -4.5 | N | N | N | 1   | 19  |     |
| NCGC00091328-01 | Furfural                                 | -4.5 |      |      | N | N | N |     | 3   | 0   |
| NCGC00091330-01 | Anthralin                                |      |      | -4.5 | N | N | N | -2  | 2   |     |
| NCGC00091341-01 | Cadmium oxide                            |      |      |      | N | N | N | -1  | 9   | 2   |

|                 |                                                |  |  |      |      |   |   |   |     |     |
|-----------------|------------------------------------------------|--|--|------|------|---|---|---|-----|-----|
| NCGC00091351-02 | m-Dinitrobenzene                               |  |  |      | N    | N | N | 4 | 3   | 11  |
| NCGC00091367-01 | Danthron                                       |  |  | -4.5 | -4.5 | N | N | N | -5  | -11 |
| NCGC00091389-01 | Iodoform                                       |  |  |      |      | N | N | N |     | 3   |
| NCGC00091390-02 | MEQUINOL                                       |  |  |      |      | N | N | N | 2   | -20 |
| NCGC00091396-02 | Benzoin                                        |  |  |      |      | N | N | N | -9  | -6  |
| NCGC00091400-01 | Allylthiourea                                  |  |  |      |      | N | N | N | 3   | 8   |
| NCGC00091414-02 | SALICYLAMIDE                                   |  |  |      |      | N | N | N | -5  |     |
| NCGC00091430-01 | Oxymetholone                                   |  |  |      |      | N | N | N |     | 2   |
| NCGC00091441-01 | a-Solanine                                     |  |  |      |      | N | N | N | 1   | 6   |
| NCGC00091444-02 | Dichloroacetic acid                            |  |  |      |      | N | N | N | 2   |     |
| NCGC00091449-05 | Eugenol                                        |  |  |      |      | N | N | N | 1   | 18  |
| NCGC00091470-02 | Isoeugenol                                     |  |  |      |      | N | N | N | -12 | -1  |
| NCGC00091502-01 | Coumarin                                       |  |  |      |      | N | N | N | -1  | 10  |
| NCGC00091507-01 | Pyrogallol                                     |  |  |      |      | N | N | N | -18 | -16 |
| NCGC00091533-04 | ETHINYL ESTRADIOL                              |  |  |      |      | N | N | N | 0   | 8   |
| NCGC00091560-01 | Cefuroxime Free Acid                           |  |  |      |      | N | N | N | -1  | -4  |
| NCGC00091575-01 | 2-ETHYL-1,3-HEXANEDIOL                         |  |  |      |      | N | N | N | 0   | -10 |
| NCGC00091596-02 | Stearic acid                                   |  |  |      |      | N | N | N | -7  | -1  |
| NCGC00091612-04 | Triacetin                                      |  |  |      |      | N | N | N |     | 8   |
| NCGC00091616-01 | 2-Ethoxybenzamide (Ethenzamide)                |  |  |      |      | N | N | N | 1   | 3   |
| NCGC00091635-01 | Fenthion (Baytex)                              |  |  |      |      | N | N | N | 0   | 3   |
| NCGC00091660-01 | FORMALDEHYDE SOLUTION                          |  |  |      |      | N | N | N |     | 6   |
| NCGC00091708-04 | COCHINEAL                                      |  |  |      |      | N | N | N | -2  | -6  |
| NCGC00091743-01 | Allyl isothiocyanate                           |  |  |      |      | N | N | N |     | -1  |
| NCGC00091810-01 | 1-Fluoro-2,4-dinitrobenzene                    |  |  |      |      | N | N | N |     | -6  |
| NCGC00091835-01 | Nitrogen mustard HCl                           |  |  |      |      | N | N | N |     | 5   |
| NCGC00091888-01 | Homosalate                                     |  |  |      |      | N | N | N | 1   |     |
| NCGC00091902-05 | MALATHION                                      |  |  |      |      | N | N | N | 8   | 10  |
| NCGC00091908-01 | 1,3-Dicaffeoylquinic Acid                      |  |  |      |      | N | N | N | -9  |     |
| NCGC00091922-02 | Sodium Dichromate Dihydrate                    |  |  |      |      | N | N | N | -1  | 2   |
| NCGC00091923-02 | Scopolamine hydrobromide trihydrate            |  |  |      |      | N | N | N | -1  | 7   |
| NCGC00091940-01 | Phenformin HCl                                 |  |  |      |      | N | N | N | -30 | -31 |
| NCGC00091942-01 | Methylphenidate hydrochloride                  |  |  |      |      | N | N | N | -1  |     |
| NCGC00091952-01 | Pheniramine maleate                            |  |  |      |      | N | N | N | 1   | 9   |
| NCGC00092278-02 | MIDAFOTELUM                                    |  |  |      |      | N | N | N | 5   | 7   |
| NCGC00092299-01 | MIFOBATUM                                      |  |  |      |      | N | N | N | 3   | 9   |
| NCGC00092314-01 | TRICIRIBINUM                                   |  |  |      |      | N | N | N | 6   | 12  |
| NCGC00092328-01 | CARMOXIROLUM                                   |  |  |      |      | N | N | N | -9  | -8  |
| NCGC00093347-02 | MESTRANOL                                      |  |  |      |      | N | N | N |     | 0   |
| NCGC00093354-03 | Niacinamide                                    |  |  |      |      | N | N | N | -7  | 3   |
| NCGC00093356-03 | ZALCITABINE                                    |  |  |      |      | N | N | N | 5   | 8   |
| NCGC00093552-01 | p-Aminoclonidine hydrochloride                 |  |  |      |      | N | N | N | -3  |     |
| NCGC00093569-01 | 3-Aminopropionitrile fumarate                  |  |  |      |      | N | N | N | -6  |     |
| NCGC00093636-03 | R-(+)-ATENOLOL                                 |  |  |      |      | N | N | N | -1  | 6   |
| NCGC00093656-01 | (E)-5-(2-Bromovinyl)-2'-deoxyuridine           |  |  |      |      | N | N | N | 2   | 10  |
| NCGC00093658-01 | B-HT 933 dihydrochloride                       |  |  |      |      | N | N | N | 3   |     |
| NCGC00093668-01 | Benazoline oxalate                             |  |  |      |      | N | N | N | -9  | -16 |
| NCGC00093739-04 | (-)-COTININE                                   |  |  |      |      | N | N | N |     | 13  |
| NCGC00093802-04 | Prasterona                                     |  |  |      |      | N | N | N | -1  |     |
| NCGC00093811-01 | Dehydroisoandrosterone 3-sulfate sodium        |  |  |      |      | N | N | N | -10 |     |
| NCGC00093850-01 | DL-alpha-Difluoromethylornithine hydrochloride |  |  |      |      | N | N | N | 11  | 16  |
| NCGC00093851-01 | ET-18-OCH3                                     |  |  |      |      | N | N | N | 6   | 8   |
| NCGC00093857-01 | Etazolate hydrochloride                        |  |  |      |      | N | N | N | -6  | -24 |
| NCGC00093867-01 | DL-erythro-Dihydrosphingosine                  |  |  |      |      | N | N | N | 5   | 8   |
| NCGC00093890-01 | S-(-)-Eticlopride hydrochloride                |  |  |      |      | N | N | N | -11 |     |
| NCGC00093898-02 | FENSPIRIDE HYDROCHLORIDE                       |  |  |      |      | N | N | N | 7   | 3   |
| NCGC00093926-03 | Doxifluridine                                  |  |  |      |      | N | N | N |     | 7   |
| NCGC00093949-03 | Hidroxiprogesterona                            |  |  |      |      | N | N | N | 4   | 6   |
| NCGC00093950-01 | L-Histidine hydrochloride                      |  |  |      |      | N | N | N | 10  | 13  |
| NCGC00093969-01 | lpratropium bromide                            |  |  |      |      | N | N | N | 10  | 5   |
| NCGC00094011-01 | m-Iodobenzylguanidine hemisulfate              |  |  |      |      | N | N | N | -34 |     |
| NCGC00094042-01 | Indatraline hydrochloride                      |  |  |      |      | N | N | N | -19 | -15 |
| NCGC00094048-01 | lofetamine hydrochloride                       |  |  |      |      | N | N | N | -8  | 4   |
| NCGC00094063-01 | CR 2945                                        |  |  |      |      | N | N | N | -6  | -10 |

|                 |                                           |      |      |      |   |   |   |     |     |     |
|-----------------|-------------------------------------------|------|------|------|---|---|---|-----|-----|-----|
| NCGC00094071-01 | 4-Methylpyrazole hydrochloride            | -4.5 |      |      | N | N | N | 1   |     | 7   |
| NCGC00094088-01 | Clorgyline hydrochloride                  | -4.5 | -4.5 |      | N | N | N | 7   |     |     |
| NCGC00094090-01 | Cysteamine hydrochloride                  |      |      |      | N | N | N | 6   | 6   | 5   |
| NCGC00094108-02 | METHOXAMINE HYDROCHLORIDE                 |      |      |      | N | N | N | 2   | 8   | 13  |
| NCGC00094121-01 | Mexiletene hydrochloride                  | -4.5 |      |      | N | N | N |     | 7   | -1  |
| NCGC00094136-01 | (-)-MK-801 hydrogen maleate               |      | -4.5 | -4.5 | N | N | N | -6  |     |     |
| NCGC00094140-01 | NCS-356                                   |      |      |      | N | N | N | 7   | 6   | 12  |
| NCGC00094179-02 | METHAPYRILENE HYDROCHLORIDE               |      |      |      | N | N | N | -17 | -14 | -10 |
| NCGC00094197-01 | Methylcarbarylcholine chloride            |      |      |      | N | N | N | -3  | 9   | 12  |
| NCGC00094199-02 | NOMIFENSINE MALEATE                       |      |      |      | N | N | N | 2   | 6   | 1   |
| NCGC00094255-01 | Bisoprolol hemifumarate salt              |      |      |      | N | N | N | 8   | 9   | -5  |
| NCGC00094285-01 | R(+)-3PPP hydrochloride                   | -4.5 | -4.5 |      | N | N | N | -3  |     |     |
| NCGC00094337-02 | DEXSOTALOLUM                              |      |      | -4.5 | N | N | N | -4  | 8   |     |
| NCGC00094357-01 | Succinylcholine chloride                  |      |      |      | N | N | N | 13  | 20  | 17  |
| NCGC00094381-03 | SEMAXANIBUM                               |      |      |      | N | N | N | 4   | 14  | 17  |
| NCGC00094393-02 | TRIHEXYPHENIDYL HYDROCHLORIDE             | -4.5 | -4.5 |      | N | N | N | -3  |     |     |
| NCGC00094509-01 | 3-Tropanylindole-3-carboxylate methiodide |      |      |      | N | N | N | -7  | -8  | -11 |
| NCGC00094524-01 | SIMAZINE                                  |      |      | -4.5 | N | N | N | 1   | 1   |     |
| NCGC00094561-01 | PHENOTHRIN                                |      |      | -4.5 | N | N | N | 12  | 14  |     |
| NCGC00094570-01 | IMIDACLOPRID                              | -4.5 |      |      | N | N | N | 1   |     | 4   |
| NCGC00094576-01 | ACETOHYDROXAMIC ACID                      |      |      |      | N | N | N | -1  | 15  | 18  |
| NCGC00094607-01 | CARBENICILLIN DISODIUM                    |      |      | -4.5 | N | N | N | 7   | 11  |     |
| NCGC00094655-01 | DIHYDROSTREPTOMYCIN SULFATE               | -4.5 |      |      | N | N | N |     | 5   | -4  |
| NCGC00094665-01 | EPHEDRINE (1R,2S) HYDROCHLORIDE           |      |      | -4.5 | N | N | N | 2   | 3   |     |
| NCGC00094670-01 | ERYTHROMYCIN                              | -4.5 |      |      | N | N | N |     | -3  | 9   |
| NCGC00094673-01 | ESTRADIOL VALERATE                        |      |      |      | N | N | N | 12  | 8   | 9   |
| NCGC00094679-01 | EUCATROPINE HYDROCHLORIDE                 |      |      |      | N | N | N | 4   | 3   | 4   |
| NCGC00094688-01 | GLUCOSAMINE HYDROCHLORIDE                 | -4.5 |      |      | N | N | N | 3   |     | 3   |
| NCGC00094692-01 | HETACILLIN POTASSIUM                      |      |      |      | N | N | N | 4   | 7   | 11  |
| NCGC00094700-01 | INDOPROFEN                                |      |      |      | N | N | N | 2   | 2   | -8  |
| NCGC00094713-01 | MEDROXYPROGESTERONE ACETATE               |      |      |      | N | N | N | 0   | -9  | -2  |
| NCGC00094720-01 | METHICILLIN SODIUM                        | -4.5 |      |      | N | N | N | 7   |     | 1   |
| NCGC00094745-01 | ORPHENADRINE CITRATE                      | -4.5 | -4.5 |      | N | N | N | 5   |     |     |
| NCGC00094747-01 | OXIDOPAMINE HYDROCHLORIDE                 | -4.5 |      |      | N | N | N |     | -5  | -1  |
| NCGC00094754-01 | PHENACEMIDE                               |      |      |      | N | N | N | 6   | 8   | 8   |
| NCGC00094765-01 | PREDNISOLONE ACETATE                      |      |      |      | N | N | N | 1   | -4  | -1  |
| NCGC00094815-01 | BROXYQUINOLINE                            |      |      |      | N | N | N | 4   | -21 | -12 |
| NCGC00094816-01 | CARNITINE HYDROCHLORIDE                   | -4.5 |      |      | N | N | N |     | 9   | 6   |
| NCGC00094817-01 | FLOPROPIONE                               |      |      | -4.5 | N | N | N | 0   | 5   |     |
| NCGC00094820-01 | IPRONIAZID SULFATE                        |      |      |      | N | N | N | 11  | 2   | 16  |
| NCGC00094832-01 | BENFLUOREX HYDROCHLORIDE                  |      |      |      | N | N | N | 8   | 8   | 18  |
| NCGC00094843-01 | ACETYLGLUCOSAMINE                         | -4.5 |      |      | N | N | N | 5   | 4   |     |
| NCGC00094855-01 | ALTHIAZIDE                                |      |      |      | N | N | N | 0   | 13  | 9   |
| NCGC00094861-01 | BRUCINE                                   |      |      |      | N | N | N | -11 | -5  | -26 |
| NCGC00094908-01 | MEPHENESIN                                |      |      |      | N | N | N | 7   | 9   | 7   |
| NCGC00094918-03 | Saccharin                                 |      |      |      | N | N | N | 1   | -1  | -1  |
| NCGC00094925-01 | ESTRADIOL ACETATE                         |      |      | -4.5 | N | N | N | 2   | -1  |     |
| NCGC00094929-01 | TOLPERISONE HYDROCHLORIDE                 | -4.5 |      |      | N | N | N |     | -5  | -17 |
| NCGC00094937-01 | CARPROFEN                                 |      |      | -4.5 | N | N | N | 1   | 7   |     |
| NCGC00094941-01 | FOSCARNET SODIUM                          | -4.5 |      |      | N | N | N |     | 2   | 3   |
| NCGC00094948-01 | METAMPICILLIN SODIUM                      |      |      | -4.5 | N | N | N | 8   | 8   |     |
| NCGC00094949-01 | FOSFOMYCIN                                | -4.5 |      |      | N | N | N | -5  |     | 11  |
| NCGC00094956-01 | CEPHALORIDINE                             | -4.5 | -4.5 |      | N | N | N | 2   |     |     |
| NCGC00094960-03 | Antraquinone                              | -4.5 |      |      | N | N | N | -11 |     | -23 |
| NCGC00094969-01 | ANISINDIONE                               |      |      | -4.5 | N | N | N | 1   | 11  |     |
| NCGC00094981-03 | Benzyl benzoate                           | -4.5 |      |      | N | N | N | -7  |     | -2  |
| NCGC00094985-01 | DINITOLMIDE                               |      |      | -4.5 | N | N | N | -1  |     | 4   |
| NCGC00094987-01 | AMINOHYDROXYBUTYRIC ACID                  | -4.5 |      |      | N | N | N |     | 4   | 6   |
| NCGC00094989-01 | CHROMOCARB                                |      |      |      | N | N | N | -8  | -2  | -7  |
| NCGC00094997-01 | QUINAPRIL HYDROCHLORIDE                   | -4.5 |      |      | N | N | N |     | 10  | 4   |
| NCGC00095002-01 | GLUCONOLACTONE                            |      |      |      | N | N | N | -1  | 7   | -1  |
| NCGC00095010-01 | THONZYLAMINE HYDROCHLORIDE                |      |      |      | N | N | N | -1  | 16  | 13  |
| NCGC00095019-01 | EDOXUDINE                                 |      |      |      | N | N | N | 5   | 11  | 11  |
| NCGC00095023-01 | ETHISTERONE                               |      |      |      | N | N | N | 10  | 16  | 7   |

|                 |                                |      |      |  |   |   |   |     |     |     |
|-----------------|--------------------------------|------|------|--|---|---|---|-----|-----|-----|
| NCGC00095042-04 | Thiotepa                       |      |      |  | N | N | N | 12  | 20  | 9   |
| NCGC00095048-01 | PIPOBROMAN                     |      |      |  | N | N | N | -14 | 0   | -14 |
| NCGC00095049-01 | EXALAMIDE                      | -4.5 |      |  | N | N | N | -12 |     | -7  |
| NCGC00095053-01 | MEPARTRICIN                    | -4.5 | -4.5 |  | N | N | N | 6   |     |     |
| NCGC00095068-01 | NAPROXOL                       |      | -4.5 |  | N | N | N | 8   | 3   |     |
| NCGC00095073-01 | RAMIFENAZONE                   |      |      |  | N | N | N | 7   | -2  | 7   |
| NCGC00095074-01 | THIODIGLYCOL                   |      |      |  | N | N | N | 7   | 16  | 10  |
| NCGC00095080-01 | CYPROTERONE                    | -4.5 |      |  | N | N | N | 4   |     | 9   |
| NCGC00095084-01 | OXYPHENCYCLIMINE HYDROCHLORIDE |      |      |  | N | N | N | -19 | -16 | -30 |
| NCGC00095088-01 | 2-THIOURACIL                   | -4.5 |      |  | N | N | N | 2   |     | 10  |
| NCGC00095095-01 | SENNOSIDE A                    |      |      |  | N | N | N | -17 | -13 | -15 |
| NCGC00095105-01 | ACETRIAZOIC ACID               | -4.5 |      |  | N | N | N | 6   |     | 3   |
| NCGC00095108-01 | MEPIVACAINE HYDROCHLORIDE      | -4.5 |      |  | N | N | N | 1   |     | -2  |
| NCGC00095109-01 | VENLAFAXINE                    | -4.5 |      |  | N | N | N |     | 7   | 1   |
| NCGC00095112-01 | AVOBENZONE                     |      | -4.5 |  | N | N | N | 0   | 10  |     |
| NCGC00095116-01 | METAXALONE                     | -4.5 | -4.5 |  | N | N | N | 3   |     |     |
| NCGC00095118-01 | ROFECOXIB                      | -4.5 |      |  | N | N | N |     | 6   | 5   |
| NCGC00095121-01 | NATEGLINIDE                    |      |      |  | N | N | N | 1   | 2   | -1  |
| NCGC00095122-01 | IRBESARTAN                     | -4.5 |      |  | N | N | N | 1   |     | -9  |
| NCGC00095127-01 | MIGLITOL                       |      |      |  | N | N | N | 3   | 9   | 8   |
| NCGC00095129-01 | VALDECOXIB                     |      |      |  | N | N | N | -9  | 0   | -14 |
| NCGC00095131-01 | PIOGLITAZONE HYDROCHLORIDE     | -4.5 |      |  | N | N | N | 6   |     | 0   |
| NCGC00095133-01 | FAMCICLOVIR                    | -4.5 |      |  | N | N | N |     | -2  | -1  |
| NCGC00095135-01 | ALMOTRIPTAN                    |      |      |  | N | N | N | 1   | 0   | -5  |
| NCGC00095137-01 | CEFTIBUTEN                     |      | -4.5 |  | N | N | N | -6  | 6   |     |
| NCGC00095139-01 | VALSARTAN                      | -4.5 |      |  | N | N | N |     | 5   | -5  |
| NCGC00095143-01 | ROSUVASTATIN                   |      |      |  | N | N | N | 1   | 3   | 3   |
| NCGC00095153-01 | TRANDOLAPRIL                   | -4.5 |      |  | N | N | N |     | 0   | -2  |
| NCGC00095155-01 | ZOLMITRIPTAN                   |      |      |  | N | N | N | 0   | 6   | -1  |
| NCGC00095156-01 | CARBADOX                       |      |      |  | N | N | N | 8   | 12  | 5   |
| NCGC00095158-01 | SECNIDAZOLE                    |      |      |  | N | N | N | -3  | 9   | -2  |
| NCGC00095164-01 | PROTHIONAMIDE                  | -4.5 | -4.5 |  | N | N | N | 1   |     | 5   |
| NCGC00095169-01 | MILTEFOSINE                    | -4.5 |      |  | N | N | N |     | -3  | 1   |
| NCGC00095176-03 | MODAFINIL                      |      |      |  | N | N | N | -1  | 2   | 9   |
| NCGC00095186-01 | PREGABALIN                     |      |      |  | N | N | N | -1  | 9   | -2  |
| NCGC00095187-01 | RAMELTEON                      |      | -4.5 |  | N | N | N | 0   | 2   |     |
| NCGC00095188-01 | PANTOPRAZOLE                   | -4.5 |      |  | N | N | N |     | 11  | -11 |
| NCGC00095190-01 | IRINOTECAN HYDROCHLORIDE       | -4.5 | -4.5 |  | N | N | N | -7  |     |     |
| NCGC00095252-01 | BISABOLOL                      |      |      |  | N | N | N | 9   | 8   | 4   |
| NCGC00095276-01 | DIBEKACIN                      |      |      |  | N | N | N | -3  | 2   | 4   |
| NCGC00095290-01 | DIALLYL TRISULFIDE             | -4.5 |      |  | N | N | N | 1   |     | 6   |
| NCGC00095312-01 | DERACOXIB                      |      | -4.5 |  | N | N | N | 3   | -1  |     |
| NCGC00095316-01 | DIPYROCETYL                    | -4.5 |      |  | N | N | N |     | 12  | 9   |
| NCGC00095321-04 | GOLDEN SEAL                    |      |      |  | N | N | N | -26 | -17 | -19 |
| NCGC00095537-01 | ARABITOL(D)                    | -4.5 |      |  | N | N | N |     | 4   | 4   |
| NCGC00095606-01 | MENTHONE                       |      | -4.5 |  | N | N | N | 8   | 10  |     |
| NCGC00095622-01 | HYPOXANTHINE                   | -4.5 |      |  | N | N | N | -8  |     | 0   |
| NCGC00095661-01 | CELLOBIOSE (D[+])              |      |      |  | N | N | N | 4   | 3   | 2   |
| NCGC00095714-01 | LIMONIN                        | -4.5 |      |  | N | N | N | 3   |     | 3   |
| NCGC00095716-01 | beta-SITOSTEROL                | -4.5 |      |  | N | N | N | 3   |     | 15  |
| NCGC00095748-01 | BATYL ALCOHOL                  | -4.5 |      |  | N | N | N |     | 12  | 5   |
| NCGC00095775-01 | TRIPLENNAMINE CITRATE          | -4.5 | -4.5 |  | N | N | N | 2   |     |     |
| NCGC00095777-01 | DEHYDROCHOLIC ACID             |      |      |  | N | N | N | 0   | -1  | -1  |
| NCGC00095778-01 | GLYCYRRHIZIC ACID              |      | -4.5 |  | N | N | N | 10  |     | 7   |
| NCGC00095787-01 | INOSINE                        | -4.5 |      |  | N | N | N |     | 5   | 7   |
| NCGC00095792-01 | HYDROXYTOLUIC ACID             |      | -4.5 |  | N | N | N | 4   | -6  |     |
| NCGC00095832-01 | HYGROMYCIN B                   | -4.5 |      |  | N | N | N |     | 8   | 4   |
| NCGC00095836-02 | SODIUM GUAIAZULENE SULFONATE   | -4.5 | -4.5 |  | N | N | N | 0   |     |     |
| NCGC00095837-01 | NEROLIDOL                      | -4.5 | -4.5 |  | N | N | N | 7   |     |     |
| NCGC00095838-01 | SUMATRIPTAN                    |      | -4.5 |  | N | N | N | 2   | -8  |     |
| NCGC00095844-01 | CONESSINE                      | -4.5 | -4.5 |  | N | N | N | -2  |     |     |
| NCGC00095872-01 | IPRIFLAVONE                    | -4.5 |      |  | N | N | N | 1   |     | -18 |
| NCGC00095896-01 | CANTHAXANTHIN (euglenanone)    | -4.5 |      |  | N | N | N |     | 15  | 0   |
| NCGC00095899-01 | RIZATRIPTAN                    |      |      |  | N | N | N | 8   | -6  | -1  |





|                 |                                 |  |  |  |      |   |   |   |     |     |     |
|-----------------|---------------------------------|--|--|--|------|---|---|---|-----|-----|-----|
| NCGC00159430-02 | Hexobarbital                    |  |  |  | -4.5 | N | N | N | 1   | 1   |     |
| NCGC00159431-02 | METHIONINE                      |  |  |  |      | N | N | N | 0   | 12  | 5   |
| NCGC00159433-02 | Pamidronate disodium            |  |  |  | -4.5 | N | N | N | 0   |     |     |
| NCGC00159434-02 | BENACTYZINUM                    |  |  |  | -4.5 | N | N | N |     | 13  | 9   |
| NCGC00159435-02 | Amiloxate                       |  |  |  |      | N | N | N | 3   | 2   |     |
| NCGC00159437-02 | CLOBUTINOL HYDROCHLORIDE        |  |  |  | -4.5 | N | N | N | -3  | -3  |     |
| NCGC00159440-02 | Temazepam                       |  |  |  | -4.5 | N | N | N |     | -1  | -5  |
| NCGC00159441-02 | DESLANOSIDE                     |  |  |  |      | N | N | N | 5   | -8  | -21 |
| NCGC00159442-02 | Galactose                       |  |  |  |      | N | N | N | -1  |     | 7   |
| NCGC00159446-02 | Carbutamide                     |  |  |  | -4.5 | N | N | N | 4   |     |     |
| NCGC00159448-02 | DIETHANOLAMINE METHOXYCINNAMATE |  |  |  |      | N | N | N | 1   | -1  |     |
| NCGC00159449-02 | Thiphenamil hydrochloride       |  |  |  |      | N | N | N | 3   | 0   |     |
| NCGC00159450-02 | PARETHOXYCAINE HYDROCHLORIDE    |  |  |  |      | N | N | N | 1   | 8   | 3   |
| NCGC00159452-02 | Sorbinil                        |  |  |  | -4.5 | N | N | N |     | 9   | -5  |
| NCGC00159453-02 | Zileuton                        |  |  |  |      | N | N | N | 2   | 12  | 17  |
| NCGC00159454-02 | Ticrynafen                      |  |  |  | -4.5 | N | N | N |     | 14  | 8   |
| NCGC00159454-03 | ACIDUM TIENILICUM               |  |  |  |      | N | N | N | 1   | 4   | 5   |
| NCGC00159458-03 |                                 |  |  |  | -4.5 | N | N | N | 1   |     | 0   |
| NCGC00159461-02 | Amprenavir                      |  |  |  |      | N | N | N | -3  | -15 | -24 |
| NCGC00159467-02 | Allocoaine                      |  |  |  |      | N | N | N | -2  | 7   |     |
| NCGC00159470-02 | VALINE                          |  |  |  | -4.5 | N | N | N | 3   |     | 1   |
| NCGC00159472-02 | Pasiniiazid                     |  |  |  | -4.5 | N | N | N | 2   |     | 6   |
| NCGC00159473-02 | DEXFENFLURAMINE                 |  |  |  | -4.5 | N | N | N |     | -1  | 5   |
| NCGC00159474-02 | FLUPREDNISOLONE                 |  |  |  | -4.5 | N | N | N |     | -4  | 3   |
| NCGC00159475-02 | Glisoxepide                     |  |  |  |      | N | N | N | -2  |     | -19 |
| NCGC00159480-03 | ESKETAMINUM                     |  |  |  | -4.5 | N | N | N | 1   |     |     |
| NCGC00159481-02 | Sofalcone                       |  |  |  |      | N | N | N | -4  | -3  | -15 |
| NCGC00159482-02 | Levobupivacaine hydrochloride   |  |  |  |      | N | N | N | 6   | 5   |     |
| NCGC00159485-02 | EDETATE CALCIUM DISODIUM        |  |  |  | -4.5 | N | N | N | 0   |     |     |
| NCGC00159491-02 | Rimantadine hydrochloride       |  |  |  | -4.5 | N | N | N | -1  |     |     |
| NCGC00159493-02 | PHENOBARBITAL                   |  |  |  | -4.5 | N | N | N |     | 12  | 7   |
| NCGC00159495-02 | Albutoin                        |  |  |  |      | N | N | N | 10  | 15  | 2   |
| NCGC00159496-02 | Sildenafil citrate              |  |  |  |      | N | N | N | -5  | -12 | -15 |
| NCGC00159497-02 | Allylestrenol                   |  |  |  |      | N | N | N | 0   | 9   | 9   |
| NCGC00159498-02 | Metipranolol                    |  |  |  | -4.5 | N | N | N | 2   |     | 3   |
| NCGC00159503-02 | Methylprednisolone acetate      |  |  |  |      | N | N | N | -2  | -2  | -5  |
| NCGC00159504-02 | THYMOL IODIDE                   |  |  |  |      | N | N | N | -14 | -27 | -39 |
| NCGC00159505-02 | PROPYLENE GLYCOL STEARATE SE    |  |  |  |      | N | N | N | 6   | -2  | -4  |
| NCGC00159506-02 | CYCLANDELATE                    |  |  |  | -4.5 | N | N | N |     | 10  | -3  |
| NCGC00159508-02 | Rose Bengal sodium              |  |  |  |      | N | N | N | 0   | -6  | -5  |
| NCGC00159511-02 | Butenafina                      |  |  |  | -4.5 | N | N | N |     | 14  | 6   |
| NCGC00159513-02 | LORACARBEF                      |  |  |  |      | N | N | N | 3   | 7   |     |
| NCGC00159515-02 | Eszopiclone                     |  |  |  | -4.5 | N | N | N |     | 2   | 9   |
| NCGC00159516-02 | Meloxicam                       |  |  |  |      | N | N | N | -9  | -8  | -14 |
| NCGC00159517-02 | Nefazodone hydrochloride        |  |  |  | -4.5 | N | N | N | -7  |     | -12 |
| NCGC00159522-02 | Cefalexina                      |  |  |  | -4.5 | N | N | N | 8   |     |     |
| NCGC00159524-01 | THIOPENTAL SODIUM               |  |  |  | -4.5 | N | N | N |     | -1  | 7   |
| NCGC00159533-01 | ELTOPRAZINUM                    |  |  |  |      | N | N | N | 3   | 1   |     |
| NCGC00160128-02 | PEPSTATINUM                     |  |  |  | -4.5 | N | N | N |     | 8   | 8   |
| NCGC00160162-02 | HORDENINE                       |  |  |  |      | N | N | N | -4  |     | -1  |
| NCGC00160351-01 | Isbogrel                        |  |  |  | -4.5 | N | N | N | 3   |     | 3   |
| NCGC00160352-01 | TENIDAPUM                       |  |  |  |      | N | N | N | 5   | 12  | -5  |
| NCGC00160353-01 | Nafenopin                       |  |  |  | -4.5 | N | N | N | -2  |     | -1  |
| NCGC00160358-01 | Difitalone                      |  |  |  |      | N | N | N | 4   | 11  | 12  |
| NCGC00160361-01 | Vanitolidia                     |  |  |  | -4.5 | N | N | N | 5   |     | 8   |
| NCGC00160362-01 | Salacetamida                    |  |  |  |      | N | N | N | 6   | -4  | 1   |
| NCGC00160363-01 | BUMECAINUM                      |  |  |  | -4.5 | N | N | N | -7  |     | -13 |
| NCGC00160364-01 | Benzylsulfamide                 |  |  |  | -4.5 | N | N | N | 7   |     |     |
| NCGC00160370-01 | Crotoniazida                    |  |  |  |      | N | N | N | 1   | 7   | 3   |
| NCGC00160373-01 | Dinaline                        |  |  |  | -4.5 | N | N | N |     | 15  | 18  |
| NCGC00160375-01 | Maleilsulfatiazol               |  |  |  |      | N | N | N | 4   | 7   |     |
| NCGC00160376-01 | METOCINI I IODIDUM              |  |  |  |      | N | N | N | 10  | 13  | 6   |
| NCGC00160377-01 | TOSIFENUM                       |  |  |  |      | N | N | N | 6   | 7   | -1  |
| NCGC00160384-01 | CLONIXINUM                      |  |  |  | -4.5 | N | N | N | 13  | 3   |     |

|                 |                                     |      |      |      |   |   |   |     |     |     |
|-----------------|-------------------------------------|------|------|------|---|---|---|-----|-----|-----|
| NCGC00160386-01 | Fluprostenol sodium                 | -4.5 |      |      | N | N | N |     | -1  | 4   |
| NCGC00160388-01 | Fluperlapine                        | -4.5 | -4.5 |      | N | N | N | 2   |     | -7  |
| NCGC00160393-01 | Sapropterin                         | -4.5 | -4.5 |      | N | N | N | -2  |     |     |
| NCGC00160395-01 | Dibenzepina                         |      |      |      | N | N | N | -9  | -11 | -6  |
| NCGC00160397-01 | IRSOGLADINE MALEATE                 | -4.5 |      |      | N | N | N | 0   |     | 4   |
| NCGC00160399-01 | FENTIAZAC                           | -4.5 | -4.5 |      | N | N | N | -1  |     |     |
| NCGC00160400-01 | TETRIDAMINUM                        |      |      |      | N | N | N | 3   | -3  | 6   |
| NCGC00160402-01 | PHENIODOLUM NATRICUM                |      |      | -4.5 | N | N | N | -4  | -1  |     |
| NCGC00160407-01 | Lomoxicam                           |      |      |      | N | N | N | -14 | -17 | -21 |
| NCGC00160408-01 | Benziodarone                        | -4.5 |      |      | N | N | N | 3   |     | 1   |
| NCGC00160409-01 | Formetorex                          |      | -4.5 |      | N | N | N | 7   | 12  |     |
| NCGC00160414-01 | Benzobarbital                       |      | -4.5 |      | N | N | N | 1   | 11  |     |
| NCGC00160415-01 | Guaiactamine                        |      |      |      | N | N | N | -4  | -7  | -1  |
| NCGC00160417-02 | S-HYDROPRENE                        |      |      |      | N | N | N | 0   | 12  | 0   |
| NCGC00160418-01 | PINCAINIDUM                         | -4.5 |      |      | N | N | N |     | 0   | 7   |
| NCGC00160421-01 | Tetrabenazine                       |      | -4.5 |      | N | N | N | -1  | 0   |     |
| NCGC00160422-01 | Chlorphentermine hydrochloride      |      |      |      | N | N | N | -11 | -14 | -12 |
| NCGC00160424-01 | CLOBENZOREX                         |      |      |      | N | N | N | 2   | 9   | 8   |
| NCGC00160430-01 | DIMETAMFETAMINUM                    |      |      | -4.5 | N | N | N | 7   | 1   |     |
| NCGC00160435-01 | Riodipine                           |      |      |      | N | N | N | 5   | 3   | -15 |
| NCGC00160439-01 | PYRROCAINUM                         | -4.5 |      |      | N | N | N | 6   |     | 2   |
| NCGC00160444-01 | Clofenamide                         | -4.5 |      |      | N | N | N | -3  |     | -5  |
| NCGC00160446-01 | Cinflumide                          | -4.5 | -4.5 |      | N | N | N | 5   |     |     |
| NCGC00160447-01 | Demoxepam                           |      |      |      | N | N | N | 11  | 1   | 2   |
| NCGC00160450-01 | Actarit                             | -4.5 |      |      | N | N | N |     | -1  | -10 |
| NCGC00160451-01 | Ibufenac                            |      | -4.5 |      | N | N | N | 0   |     | 5   |
| NCGC00160452-01 | Clopirac                            |      |      |      | N | N | N | -13 | -10 | -16 |
| NCGC00160454-01 | FELBINAC ETHYL                      |      |      |      | N | N | N | -17 | -13 | -7  |
| NCGC00160457-01 | Pivagabine                          |      |      | -4.5 | N | N | N | 4   | 11  |     |
| NCGC00160458-01 | Lozilurea                           |      |      |      | N | N | N | 0   | 11  | 7   |
| NCGC00160459-01 | Xilobam                             |      |      |      | N | N | N | 9   | 8   | 6   |
| NCGC00160467-01 | TENOCYCLIDINUM                      |      |      |      | N | N | N | 6   | 16  | 7   |
| NCGC00160468-01 | Tripalmitin                         | -4.5 |      |      | N | N | N |     | 3   | 2   |
| NCGC00160471-01 | SAFFRON                             | -4.5 |      |      | N | N | N |     | 0   | -3  |
| NCGC00160474-01 | Benzetimidum                        |      |      |      | N | N | N | 6   | 6   | 5   |
| NCGC00160480-01 | Pecazina                            |      |      |      | N | N | N | -16 | -13 | -24 |
| NCGC00160484-01 | ETAFENONE HYDROCHLORIDE             |      |      |      | N | N | N | -16 | -17 | -23 |
| NCGC00160485-01 | DIMAZOLE DIHYDROCHLORIDE            | -4.5 | -4.5 |      | N | N | N | -5  |     |     |
| NCGC00160487-01 | 1-PIPERIDINOCYCLOHEXANECARBONITRILE |      | -4.5 |      | N | N | N | 1   | 10  |     |
| NCGC00160489-01 | Opiniazida                          |      | -4.5 |      | N | N | N | 5   | 14  |     |
| NCGC00160491-01 | Azabuperona                         | -4.5 |      |      | N | N | N | 3   |     | -1  |
| NCGC00160492-01 | Quifenadine                         |      |      |      | N | N | N | -21 | -17 | -21 |
| NCGC00160501-01 | Pimeclone                           |      |      | -4.5 | N | N | N | 2   | 7   |     |
| NCGC00160508-01 | ISOSORBIDE                          |      |      |      | N | N | N | 6   | 14  | 4   |
| NCGC00160510-01 | Etocarlida                          | -4.5 |      |      | N | N | N | 0   |     | -2  |
| NCGC00160513-01 | TESTOSTERONE DECANOATE              |      |      | -4.5 | N | N | N | 1   | 7   |     |
| NCGC00160514-01 | Idebenone                           |      |      | -4.5 | N | N | N | -3  | -22 |     |
| NCGC00160516-01 | Pidotimod                           | -4.5 |      |      | N | N | N |     | 9   | -1  |
| NCGC00160518-01 | Orbifloxacin                        |      | -4.5 |      | N | N | N | -1  |     | -1  |
| NCGC00160519-01 | ACIPIMOX                            | -4.5 | -4.5 |      | N | N | N | 12  |     |     |
| NCGC00160521-01 | ERYTHROMYCIN                        |      | -4.5 |      | N | N | N | -10 |     | -20 |
| NCGC00160525-01 | Zaleplon                            | -4.5 |      |      | N | N | N |     | -1  | -1  |
| NCGC00160529-01 | Tizanidina                          | -4.5 |      |      | N | N | N |     | 17  | 3   |
| NCGC00160530-01 | Toremifene citrate                  |      |      | -4.5 | N | N | N | -7  | -12 |     |
| NCGC00160535-01 | Fluindiona                          |      |      |      | N | N | N | 1   | 0   | 3   |
| NCGC00160536-01 | Colestolone                         |      |      | -4.5 | N | N | N | 6   | 9   |     |
| NCGC00160540-01 | Ethiazide                           |      |      |      | N | N | N | -1  | 15  | 6   |
| NCGC00160541-01 | Romazarit                           |      |      |      | N | N | N | 5   | 7   | -2  |
| NCGC00160545-01 | Benmoxin                            |      |      | -4.5 | N | N | N | 11  | 7   |     |
| NCGC00160547-01 | FOMOCAINUM                          | -4.5 |      |      | N | N | N |     | 9   | 0   |
| NCGC00160548-01 | Ethoxazene hydrochloride            |      |      |      | N | N | N | -8  | 0   | 1   |
| NCGC00160552-01 | INULIN (HYDROXYMETHYL, C-14)        |      | -4.5 |      | N | N | N | 3   |     | 6   |
| NCGC00160553-01 | Diphenadione                        | -4.5 |      |      | N | N | N | 3   |     | 5   |
| NCGC00160557-01 | Clorindione                         |      |      |      | N | N | N | -1  | -2  | -1  |

|                 |                                           |      |      |   |   |   |     |     |     |
|-----------------|-------------------------------------------|------|------|---|---|---|-----|-----|-----|
| NCGC00160558-01 | Diamfenetida                              | -4.5 |      | N | N | N | 9   |     | 0   |
| NCGC00160563-01 | Carbocloral                               | -4.5 | -4.5 | N | N | N | 7   |     |     |
| NCGC00160564-01 | Difenano                                  |      |      | N | N | N | 7   |     | 4   |
| NCGC00160569-01 | Dibemethine                               |      |      | N | N | N | 4   | 12  | 0   |
| NCGC00160570-01 | Butonate                                  |      |      | N | N | N | 0   | -3  | 3   |
| NCGC00160579-01 | Mexenone                                  |      |      | N | N | N | 10  | 6   | 5   |
| NCGC00160581-01 | 3,3,5-TRIMETHYLCYCLOHEXANOL               |      |      | N | N | N | -5  | 8   | 8   |
| NCGC00160589-01 | Chlorindanol                              |      |      | N | N | N | 1   | 3   | 6   |
| NCGC00160592-01 | Lorbamate                                 |      |      | N | N | N | 6   | 5   | 5   |
| NCGC00160593-01 | ALPHA-BENZYLIMINO-ALPHA-METHYL-O-CRESOLÃ, |      | -4.5 | N | N | N | -4  | 9   |     |
| NCGC00160595-01 | Clazolam                                  |      |      | N | N | N | -6  | -3  | -5  |
| NCGC00160597-01 | Neocinchophen                             |      |      | N | N | N | 23  | 26  | 30  |
| NCGC00160598-01 | Penthrichloral                            |      |      | N | N | N | 6   | 15  | 10  |
| NCGC00160602-01 | Tenilidona                                |      |      | N | N | N | 12  | 10  | 6   |
| NCGC00160603-02 | STYRYLPYRIDINIUM CHLORIDE                 |      | -4.5 | N | N | N | 5   | 6   |     |
| NCGC00160611-01 | Povidone-iodine                           | -4.5 |      | N | N | N | 0   |     | -1  |
| NCGC00160613-01 | PYRROLIDONE CARBOXYLIC ACID               | -4.5 | -4.5 | N | N | N | -1  |     |     |
| NCGC00160615-01 | SUCRALFATE                                |      | -4.5 | N | N | N | -2  | 13  |     |
| NCGC00160617-01 | COCARBOXYLASE                             |      |      | N | N | N | -4  | -2  | -7  |
| NCGC00160622-01 | DELTA-TOCOPHEROL, D-                      | -4.5 |      | N | N | N | -2  |     | 3   |
| NCGC00160624-01 | Ethopabate                                | -4.5 | -4.5 | N | N | N | 0   |     |     |
| NCGC00160628-01 | Rutin                                     | -4.5 | -4.5 | N | N | N | 3   |     |     |
| NCGC00160631-01 | FAMPHUR                                   | -4.5 |      | N | N | N | -17 |     | -13 |
| NCGC00160640-01 | Bretazenil                                |      |      | N | N | N | -14 | -12 | -8  |
| NCGC00160642-01 | Veraliprida                               | -4.5 |      | N | N | N | -6  |     | 5   |
| NCGC00160643-01 | PIPEROXANUM                               | -4.5 | -4.5 | N | N | N | 4   |     |     |
| NCGC00160645-01 | Butamirate citrate                        |      |      | N | N | N | 3   | -5  | -7  |
| NCGC00160646-01 | Pipofezine                                |      |      | N | N | N | 9   | 3   | -1  |
| NCGC00160649-01 | Glycyclamide                              | -4.5 |      | N | N | N |     | -2  | 12  |
| NCGC00160651-01 | SULFASUCCINAMIDUM                         | -4.5 | -4.5 | N | N | N | -2  |     | 6   |
| NCGC00160653-01 | Glisobuzol                                | -4.5 | -4.5 | N | N | N | 1   |     |     |
| NCGC00160654-01 | Ethylparaben                              |      |      | N | N | N | -1  | 11  | 12  |
| NCGC00160655-01 | Tenonitrozol                              | -4.5 |      | N | N | N |     | 3   | -9  |
| NCGC00160656-01 | Verazide                                  | -4.5 | -4.5 | N | N | N | 9   |     |     |
| NCGC00160660-01 | Dazmegrel                                 |      |      | N | N | N | 6   | -8  | -5  |
| NCGC00160662-01 | AMBRISENTAN                               |      |      | N | N | N | 0   | 0   | 7   |
| NCGC00160663-01 | Flazalone                                 |      |      | N | N | N | 8   | 9   | -2  |
| NCGC00160668-01 | Sulfabenz                                 | -4.5 | -4.5 | N | N | N | 4   |     |     |
| NCGC00160670-01 | Mecarbinat                                | -4.5 | -4.5 | N | N | N | 0   |     |     |
| NCGC00160679-01 | Dinsed                                    | -4.5 |      | N | N | N | -10 |     | -20 |
| NCGC00160681-01 | Risocaine                                 |      |      | N | N | N | 4   | 8   | 13  |
| NCGC00160683-01 | Ftaxilida                                 |      |      | N | N | N | 5   | 3   | 6   |
| NCGC00161327-04 | CALCITRIOL                                |      | -4.5 | N | N | N | -8  | 1   |     |
| NCGC00161405-01 | Indorenate hydrochloride                  |      |      | N | N | N | -1  | 14  | 13  |
| NCGC00162100-02 | Dexbrompheniramine maleate salt           |      |      | N | N | N | -8  | -6  | -15 |
| NCGC00162175-01 | Alinidine                                 | -4.5 |      | N | N | N | -5  |     | -4  |
| NCGC00162267-02 | NALOXONE                                  |      | -4.5 | N | N | N | 4   | 7   |     |
| NCGC00162445-02 | Misoprostol                               |      |      | N | N | N | 8   | 4   | -1  |
| NCGC00163125-02 | Pregnenolona                              | -4.5 |      | N | N | N | 5   |     | 5   |
| NCGC00163146-01 | ACONITINE                                 |      |      | N | N | N | 0   | -2  | -3  |
| NCGC00163165-01 | ERGONOVINE                                |      |      | N | N | N | -11 | -12 | -6  |
| NCGC00163177-01 | NALOXONE METHIODIDE                       |      | -4.5 | N | N | N | 8   | 11  |     |
| NCGC00163182-01 | (-)-NORCODEINE                            | -4.5 |      | N | N | N | 4   |     | -1  |
| NCGC00163217-01 | CARBAMYL-beta-METHYLCHOLINE               |      |      | N | N | N | 1   | 10  | 7   |
| NCGC00163219-01 | CARBAMYLCHOLINE                           |      |      | N | N | N | 9   | 5   | 6   |
| NCGC00163239-01 | HEXAMETHONIUM                             |      |      | N | N | N | 0   | 13  | 11  |
| NCGC00163287-01 | 5-alpha-PREGNAN-3-alpha-OL-20-ONE         | -4.5 |      | N | N | N | -3  |     | 2   |
| NCGC00163298-01 | Lisofylline                               |      |      | N | N | N | 1   | 3   | 11  |
| NCGC00163309-01 | ADENOSINE TRIPHOSPHATE                    | -4.5 |      | N | N | N |     | 11  | 13  |
| NCGC00163319-01 | ADENOSINE-5'-MONOPHOSPHATE (AMP)          | -4.5 |      | N | N | N | -2  |     | 7   |
| NCGC00163335-01 | D-LEUCINE                                 |      |      | N | N | N | 4   | 10  | 10  |
| NCGC00163349-01 | (-)-3,4-DIHYDROXYNOREPHEDRINE             | -4.5 |      | N | N | N |     | -1  | -6  |
| NCGC00163360-01 | (+)-NICOTINE                              |      |      | N | N | N | 0   | -1  | 6   |
| NCGC00163481-02 | TRIDOLGOSIRUM                             | -4.5 |      | N | N | N | 0   | 9   |     |

|                 |                                                                         |      |      |   |   |   |     |     |     |
|-----------------|-------------------------------------------------------------------------|------|------|---|---|---|-----|-----|-----|
| NCGC00163597-02 | LS-63800                                                                | -4.5 | -4.5 | N | N | N | -1  |     |     |
| NCGC00163674-01 | RIFAMYCIN SV-NA                                                         | -4.5 | -4.5 | N | N | N | 0   |     |     |
| NCGC00163745-03 | CLOFENVINFOSUM                                                          |      |      | N | N | N | -7  | -13 | -24 |
| NCGC00163754-02 | ALANINE                                                                 | -4.5 |      | N | N | N | 3   |     | 8   |
| NCGC00163786-03 | BIORESMETHRINUM                                                         | -4.5 |      | N | N | N | 3   |     | -10 |
| NCGC00163803-03 | CYROMAZINUM                                                             | -4.5 |      | N | N | N | -1  |     | -1  |
| NCGC00163910-02 | TEMEFOSUM                                                               | -4.5 |      | N | N | N |     | 8   | 0   |
| NCGC00163935-02 | MAGNESIUM TRISILICATE                                                   |      |      | N | N | N | 8   |     | 0   |
| NCGC00164071-01 | Tetradecanoic acid, 1-methylethyl ester                                 | -4.5 | -4.5 | N | N | N | -5  |     | -1  |
| NCGC00164076-01 | D-Gluconic acid, monosodium salt                                        | -4.5 |      | N | N | N |     | 15  | 5   |
| NCGC00164086-01 | Disiloxane, hexamethyl-                                                 |      |      | N | N | N | 7   | 12  | 6   |
| NCGC00164127-02 | TYLOXAPOL                                                               |      | -4.5 | N | N | N | 6   | -1  |     |
| NCGC00164155-01 | benzyl 4-hydroxybenzoate                                                | -4.5 |      | N | N | N |     | -8  | 1   |
| NCGC00164173-02 | OCTABENZONUM                                                            |      | -4.5 | N | N | N | 6   | 1   |     |
| NCGC00164237-01 | 3-Butenoic acid, 2-amino-4-(2-aminoethoxy)-, monohydrochloride, (S)-(E) |      |      | N | N | N | 16  | 22  | 12  |
| NCGC00164243-01 | Chloramine T trihydrate                                                 |      | -4.5 | N | N | N | 1   | 9   |     |
| NCGC00164246-01 | D-Mannitol                                                              |      | -4.5 | N | N | N | -1  | 2   |     |
| NCGC00164256-01 | Monocrotaline                                                           | -4.5 |      | N | N | N |     | 9   | 4   |
| NCGC00164329-02 | DECTAFLURUM                                                             | -4.5 | -4.5 | N | N | N | 5   |     | 2   |
| NCGC00164336-01 | Levothyroxine                                                           | -4.5 |      | N | N | N |     | -6  | -3  |
| NCGC00164344-01 | Symclocsene                                                             | -4.5 | -4.5 | N | N | N | 1   |     | -3  |
| NCGC00164358-01 | Hexadecanoic acid                                                       | -4.5 |      | N | N | N | 1   |     | -9  |
| NCGC00164362-01 | Dodecylbenzenesulfonic acid, sodium salt                                |      |      | N | N | N | 0   | -1  | 2   |
| NCGC00164375-01 | 2-Propanol, 1-phenoxy-                                                  |      | -4.5 | N | N | N | 3   | 14  |     |
| NCGC00164378-01 | Cyanamide                                                               |      | -4.5 | N | N | N | 2   | 13  |     |
| NCGC00164379-01 | Amrinone                                                                |      |      | N | N | N | 10  | 16  |     |
| NCGC00164380-02 | FORMESTANUM                                                             | -4.5 |      | N | N | N | 1   |     | -18 |
| NCGC00164388-01 | ImidazolidinyI urea                                                     |      |      | N | N | N | 5   | 8   | 6   |
| NCGC00164390-01 | Milrinone                                                               |      | -4.5 | N | N | N | -10 |     | -2  |
| NCGC00164429-01 | Feredato sodico                                                         |      |      | N | N | N | -10 | -5  | -9  |
| NCGC00164445-01 | Troglitazone                                                            |      |      | N | N | N | -8  | -19 | -19 |
| NCGC00164446-01 | Ciglitizone                                                             |      |      | N | N | N | 2   | -9  | -17 |
| NCGC00164480-01 | MECLORALUREA                                                            | -4.5 |      | N | N | N |     | 12  | 11  |
| NCGC00164482-01 | Molracetam                                                              | -4.5 | -4.5 | N | N | N | -5  |     |     |
| NCGC00164483-01 | AMINDOCATUM                                                             |      |      | N | N | N | 2   | 2   | 3   |
| NCGC00164489-01 | AMIPHENAZOLUM                                                           | -4.5 |      | N | N | N |     | 8   | 0   |
| NCGC00164491-01 | Lidofenin                                                               | -4.5 | -4.5 | N | N | N | -2  |     |     |
| NCGC00164492-01 | Sulfisomidine                                                           |      | -4.5 | N | N | N | -1  | 4   |     |
| NCGC00164495-01 | Nicotiazone                                                             | -4.5 |      | N | N | N | 9   |     | 1   |
| NCGC00164496-01 | ALAFOSFALINUM                                                           |      |      | N | N | N | -7  | 6   | 10  |
| NCGC00164497-01 | GLYOCTAMIDUM                                                            | -4.5 |      | N | N | N |     | 8   | 1   |
| NCGC00164499-01 | TOCOPHEROL NICOTINATE                                                   |      |      | N | N | N | 11  | 17  | 10  |
| NCGC00164500-01 | MONOPHOSPHOTHIAMINUM                                                    |      | -4.5 | N | N | N | -4  |     | 0   |
| NCGC00164502-01 | Nifuraldezone                                                           |      |      | N | N | N | -7  | -20 | -13 |
| NCGC00164503-01 | MYRALACTUM                                                              |      |      | N | N | N | -2  | -6  | -17 |
| NCGC00164506-01 | Tiliquinol                                                              |      |      | N | N | N | -20 | -22 | -2  |
| NCGC00164510-01 | Idrocilamida                                                            |      |      | N | N | N | 18  | -4  | 6   |
| NCGC00164513-01 | CALCI BENZAMIDOSALICYLAS                                                | -4.5 |      | N | N | N |     | -1  | 0   |
| NCGC00164516-01 | Eprobemida                                                              |      |      | N | N | N | -3  | -2  | -3  |
| NCGC00164517-01 | OXACEPROLUM                                                             |      | -4.5 | N | N | N | 4   | 12  |     |
| NCGC00164525-01 | MUROMONAB-CD3                                                           | -4.5 |      | N | N | N |     | 8   | 2   |
| NCGC00164527-01 | Lysine                                                                  | -4.5 |      | N | N | N |     | -1  | 6   |
| NCGC00164528-01 | GLYCEROL MONOLAURATE                                                    | -4.5 |      | N | N | N |     | 2   | 1   |
| NCGC00164530-01 | CINROMIDUM                                                              | -4.5 |      | N | N | N |     | 11  | 0   |
| NCGC00164533-01 | BUFORMIN HYDROCHLORIDE                                                  |      | -4.5 | N | N | N | -1  | 5   |     |
| NCGC00164534-01 | PHENOLSULFONIC ACID                                                     |      | -4.5 | N | N | N | 7   | 5   |     |
| NCGC00164535-01 | Phenmetrazine Hydrochloride                                             | -4.5 | -4.5 | N | N | N | 7   |     |     |
| NCGC00164540-01 | CLOFEXAMIDUM                                                            | -4.5 | -4.5 | N | N | N | -6  |     |     |
| NCGC00164544-01 | LANOCONAZOLE                                                            |      |      | N | N | N | -5  | -13 | -8  |
| NCGC00164546-01 | Faropenem                                                               |      | -4.5 | N | N | N | -4  | 12  |     |
| NCGC00164549-01 | Dofetilide                                                              | -4.5 |      | N | N | N |     | 3   | 5   |
| NCGC00164550-01 | LAFUTIDINE                                                              | -4.5 | -4.5 | N | N | N | 10  |     | -3  |
| NCGC00164551-01 | Biapenem                                                                | -4.5 |      | N | N | N | 0   |     | 5   |
| NCGC00164555-01 | Entacapone                                                              |      |      | N | N | N | -2  | -6  | -14 |

|                 |                                       |  |  |      |      |      |      |   |   |     |     |     |     |
|-----------------|---------------------------------------|--|--|------|------|------|------|---|---|-----|-----|-----|-----|
| NCGC00164556-01 | FUDOSTEINE                            |  |  |      | -4.5 | N    | N    | N | 1 | 12  |     |     |     |
| NCGC00164558-01 | PARGEVERINUM                          |  |  |      |      | N    | N    | N | 9 | 14  | 10  |     |     |
| NCGC00164561-01 | Zanamivir                             |  |  |      | -4.5 | -4.5 | N    | N | N | -2  |     |     |     |
| NCGC00164562-01 | SIMENDANUM                            |  |  |      | -4.5 | -4.5 | N    | N | N | 7   |     |     |     |
| NCGC00164564-01 | EMTRICITABINE                         |  |  |      |      | -4.5 | N    | N | N | 7   | 11  |     |     |
| NCGC00164566-01 | Pitavastatin                          |  |  |      | -4.5 | -4.5 | N    | N | N | 0   |     |     |     |
| NCGC00164568-01 | MONTELUKAST SODIUM                    |  |  | -4.5 |      |      | N    | N | N |     | -3  | -4  |     |
| NCGC00164569-01 | Capecitabine                          |  |  |      |      |      | N    | N | N | 4   | -18 | -10 |     |
| NCGC00164573-01 | flurazepam                            |  |  |      |      |      | N    | N | N | -10 | -14 | -20 |     |
| NCGC00164581-01 | ESTRAMUSTINE PHOSPHATE SODIUM         |  |  |      |      | -4.5 | N    | N | N | 13  | 2   |     |     |
| NCGC00164586-01 | Pitofenona                            |  |  |      |      | -4.5 | N    | N | N | 2   | -15 |     |     |
| NCGC00164589-01 | Phenprobamate                         |  |  |      |      | -4.5 | N    | N | N | 0   |     |     |     |
| NCGC00164590-01 | Drospirenona                          |  |  | -4.5 |      |      | N    | N | N |     | -21 | -14 |     |
| NCGC00164597-01 | ROPIVACAINE HYDROCHLORIDE MONOHYDRATE |  |  |      |      |      | N    | N | N | -1  | 0   | 6   |     |
| NCGC00164604-01 | Fluvastatina                          |  |  |      |      | -4.5 | N    | N | N | -2  | -5  |     |     |
| NCGC00164606-01 | TROCIMINUM                            |  |  |      |      |      | N    | N | N | 7   | 15  | 9   |     |
| NCGC00164609-01 | FLUCLOXACILLIN MAGNESIUM              |  |  |      |      | -4.5 | -4.5 | N | N | N   | 3   |     |     |
| NCGC00164612-01 | ISOPROPYLANTIPYRINE                   |  |  |      |      | -4.5 | -4.5 | N | N | N   | 9   |     |     |
| NCGC00164613-01 | Epalrestat                            |  |  |      |      | -4.5 | -4.5 | N | N | N   | 2   |     |     |
| NCGC00164617-01 | Adapalene                             |  |  | -4.5 |      |      | N    | N | N |     | 8   | 6   |     |
| NCGC00164619-01 | Anastrozole                           |  |  | -4.5 |      |      | N    | N | N |     | 10  | 11  |     |
| NCGC00164625-02 | CERIVASTATIN SODIUM                   |  |  |      |      |      | N    | N | N | -14 | -14 | -14 |     |
| NCGC00164626-01 | Tiagabine hydrochloride               |  |  | -4.5 |      |      | N    | N | N |     | -3  | -1  |     |
| NCGC00164628-01 | Linezolid                             |  |  |      |      |      | N    | N | N | -6  | 6   | -15 |     |
| NCGC00164632-01 | TIBOLONE                              |  |  |      |      | -4.5 |      | N | N | N   | 1   | -14 |     |
| NCGC00164637-01 | Nifekalant                            |  |  |      |      |      | N    | N | N | 2   | -10 | -6  |     |
| NCGC00165714-02 | ADRAFINILUM                           |  |  |      |      |      | N    | N | N | -1  | -1  | 0   |     |
| NCGC00165774-02 | CLOPROSTENOL SODIUM                   |  |  |      |      | -4.5 |      | N | N | N   | 2   | -2  |     |
| NCGC00165787-02 | DALTROBANUM                           |  |  |      |      | -4.5 | -4.5 | N | N | N   | 4   |     |     |
| NCGC00165802-02 | GANAXOLONUM                           |  |  |      |      |      | N    | N | N | 8   | 2   | 3   |     |
| NCGC00165864-02 | PIPAMPERONE HYDROCHLORIDE             |  |  | -4.5 |      |      | N    | N | N |     | -12 | -12 |     |
| NCGC00165883-02 | RUFINAMIDE                            |  |  |      |      | -4.5 |      | N | N | N   | 4   | 8   |     |
| NCGC00165912-02 | TOFISOPAM                             |  |  |      |      |      | N    | N | N | 3   | -1  | 4   |     |
| NCGC00165968-01 | REPARIXIN                             |  |  |      |      |      | N    | N | N | 4   | 9   | 6   |     |
| NCGC00165970-01 | Etiracetam                            |  |  |      |      | -4.5 |      | N | N | N   | 1   | -2  |     |
| NCGC00165971-01 | PERFLUNAFENUM                         |  |  |      |      |      | N    | N | N | 3   | 3   | 14  |     |
| NCGC00165972-01 | PHENYLPROPANOL                        |  |  |      |      |      | N    | N | N | 0   | 7   | 0   |     |
| NCGC00165976-01 | HEXAMETHYLTETRACOSANE                 |  |  |      |      |      | N    | N | N | 0   | 0   | 9   |     |
| NCGC00165978-01 | SODIUM POLYSTYRENE SULFONATE          |  |  |      |      |      | N    | N | N | 6   | 9   | 5   |     |
| NCGC00165979-01 | CINNAMIC ACID                         |  |  |      |      | -4.5 | -4.5 | N | N | N   | 1   |     |     |
| NCGC00165983-01 | FD & C Red Dye No. 2                  |  |  |      |      | -4.5 |      | N | N | N   | -5  |     | -6  |
| NCGC00165991-01 | FLUROTYLUM                            |  |  | -4.5 |      |      |      | N | N | N   |     | 10  | 6   |
| NCGC00165993-01 | CHROMIUM PICOLINATE                   |  |  |      |      | -4.5 |      | N | N | N   | -1  |     | 8   |
| NCGC00165999-01 | Cyclamic acid                         |  |  |      |      | -4.5 |      | N | N | N   | -2  |     | -11 |
| NCGC00166000-01 | Iohexol                               |  |  |      |      | -4.5 |      | N | N | N   | -1  |     | 4   |
| NCGC00166005-01 | Mecisteina                            |  |  |      |      |      | N    | N | N | 1   | -4  | 0   |     |
| NCGC00166018-01 | Actinoquinolum                        |  |  |      |      | -4.5 | -4.5 | N | N | N   | 6   |     |     |
| NCGC00166020-01 | TRICAINE METHANESULFONATE             |  |  |      |      | -4.5 | -4.5 | N | N | N   | 0   |     |     |
| NCGC00166022-01 | METHENAMINE                           |  |  |      |      | -4.5 |      | N | N | N   | 0   |     | 11  |
| NCGC00166024-01 | Hetaflur                              |  |  | -4.5 |      |      |      | N | N | N   |     | -1  | -1  |
| NCGC00166025-01 | Methylpentynolum                      |  |  |      |      |      | N    | N | N | -1  | 2   | 0   |     |
| NCGC00166035-01 | Demecolcine                           |  |  |      |      | -4.5 | -4.5 | N | N | N   | 4   |     |     |
| NCGC00166041-01 | Dimepranolum                          |  |  |      |      |      | N    | N | N | 3   | 8   | 1   |     |
| NCGC00166043-01 | Flamenol                              |  |  |      |      | -4.5 | -4.5 | N | N | N   | 6   |     |     |
| NCGC00166056-01 | ETHYL NICOTINATE                      |  |  |      |      |      | N    | N | N | -1  | 1   | 9   |     |
| NCGC00166059-01 | Aluminum subacetate                   |  |  |      |      | -4.5 |      | N | N | N   | 0   |     | 3   |
| NCGC00166061-01 | L-CYSTEINE ETHYLESTER HYDROCHLORIDE   |  |  |      |      | -4.5 | -4.5 | N | N | N   | 2   |     |     |
| NCGC00166070-01 | Decaminol                             |  |  |      |      |      | N    | N | N | -11 | -28 | -20 |     |
| NCGC00166071-01 | ISOLEUCINE                            |  |  |      |      |      | N    | N | N | 2   | 4   | 5   |     |
| NCGC00166075-01 | Piconol                               |  |  |      |      |      | N    | N | N | 3   | 10  | 12  |     |
| NCGC00166079-01 | SCARLET RED                           |  |  |      |      |      | N    | N | N | 4   | 6   | -1  |     |
| NCGC00166080-01 | DEANOLI ACEGLUMAS                     |  |  | -4.5 |      |      | N    | N | N |     | 0   | 0   |     |
| NCGC00166086-01 | OCTODRINUM                            |  |  | -4.5 |      |      | N    | N | N |     | 12  | 0   |     |
| NCGC00166088-01 | 5-Aza-2'-deoxycytidine                |  |  |      |      | -4.5 |      | N | N | N   | 1   | 8   |     |



|                 |                                           |  |      |      |      |   |   |     |     |     |
|-----------------|-------------------------------------------|--|------|------|------|---|---|-----|-----|-----|
| NCGC00167437-01 | RAMOSETRON HYDROCHLORIDE                  |  | -4.5 | -4.5 | N    | N | N | -6  |     |     |
| NCGC00167440-01 | BOSENTAN                                  |  |      | -4.5 | -4.5 | N | N | N   | -1  |     |
| NCGC00167441-01 | PRAMIPEXOLE DIHYDROCHLORIDE               |  | -4.5 |      | N    | N | N |     | 8   | 2   |
| NCGC00167442-01 | TAMSULOSIN HYDROCHLORIDE                  |  |      | -4.5 | N    | N | N | 4   | 2   |     |
| NCGC00167443-01 | AFLOQUALONE                               |  |      | -4.5 | -4.5 | N | N | N   | 5   |     |
| NCGC00167444-01 | CEFPYRAMIDE SODIUM                        |  | -4.5 |      | N    | N | N |     | 2   | 3   |
| NCGC00167445-01 | EPRAZINONE HYDROCHLORIDE                  |  |      | -4.5 | N    | N | N | 12  | 3   |     |
| NCGC00167446-01 | METHYCLOTHIAZIDE                          |  | -4.5 |      | N    | N | N |     | 3   | -4  |
| NCGC00167448-01 | TREPIBUTONE                               |  |      |      | N    | N | N | 2   | -9  | -5  |
| NCGC00167450-01 | TRILOSTANE                                |  |      |      | N    | N | N | -12 | -21 | -26 |
| NCGC00167452-01 | PIRENOXINE                                |  |      |      | N    | N | N | -18 | -17 | -25 |
| NCGC00167453-01 | CLINOFIBRATE                              |  |      | -4.5 | -4.5 | N | N | N   | 1   |     |
| NCGC00167455-01 | ZOFENOPRIL                                |  |      |      | N    | N | N | 4   | 7   | 7   |
| NCGC00167456-01 | BISIBUTHIAMINE                            |  |      | -4.5 | N    | N | N | -3  |     | -2  |
| NCGC00167463-01 | CEFMENOXIME HYDROCHLORIDE                 |  |      | -4.5 | -4.5 | N | N | N   | 2   |     |
| NCGC00167464-01 | HYDROCORTISONE SODIUM PHOSPHATE           |  |      |      | N    | N | N | 3   | 1   | 3   |
| NCGC00167466-01 | LOMUSTINE                                 |  |      | -4.5 | -4.5 | N | N | N   | 6   |     |
| NCGC00167468-01 | BENORILATE                                |  |      | -4.5 | -4.5 | N | N | N   | 5   | 13  |
| NCGC00167469-01 | MIVACURIUM CHLORIDE                       |  |      | -4.5 | N    | N | N | -6  |     | -12 |
| NCGC00167470-01 | MEZLOCILLIN SODIUM MONOHYDRATE            |  | -4.5 |      | N    | N | N |     | 11  | 0   |
| NCGC00167471-01 | ANETHOLE TRITHIONE                        |  |      |      | N    | N | N | -16 | -13 | -24 |
| NCGC00167473-01 | CAPREOMYCIN SULFATE                       |  |      |      | N    | N | N | 10  | -1  | 2   |
| NCGC00167474-01 | CANDESARTAN CILEXETIL                     |  |      | -4.5 | N    | N | N | 8   | 6   |     |
| NCGC00167477-01 | FIDARESTAT                                |  | -4.5 |      | N    | N | N |     | 3   | -1  |
| NCGC00167478-01 | GAMMA ORYZANOL                            |  |      | -4.5 | N    | N | N | 1   | 5   |     |
| NCGC00167491-01 | LENALIDOMIDE                              |  |      |      | N    | N | N | -3  | 7   | 10  |
| NCGC00167494-01 | ANDROSTENEDIONE                           |  | -4.5 |      | N    | N | N |     | 5   | 0   |
| NCGC00167497-01 | ACIPIMOX                                  |  |      |      | N    | N | N | 6   | 5   | 8   |
| NCGC00167499-01 | ROXATIDINE ACETATE HYDROCHLORIDE          |  |      | -4.5 | N    | N | N | 2   |     | 8   |
| NCGC00167506-01 | PIMECROLIMUS                              |  | -4.5 |      | N    | N | N |     | 4   | 6   |
| NCGC00167510-01 | DORIPENEM HYDRATE                         |  |      |      | N    | N | N | 6   | 22  | 24  |
| NCGC00167511-01 | PEMOLINE                                  |  |      | -4.5 | N    | N | N | 1   |     | 6   |
| NCGC00167515-01 | ENOCITABINE                               |  |      | -4.5 | N    | N | N | -5  |     | -2  |
| NCGC00167518-01 | TEMSIROLIMUS                              |  | -4.5 |      | N    | N | N |     | 6   | -5  |
| NCGC00167519-01 | RAMATROBAN                                |  |      | -4.5 | -4.5 | N | N | N   | -2  | -1  |
| NCGC00167520-01 | CILOMILAST                                |  | -4.5 |      | N    | N | N |     | 2   | 3   |
| NCGC00167527-01 | GREPAFLOXACIN HYDROCHLORIDE               |  |      |      | N    | N | N | -2  | -2  | -7  |
| NCGC00167528-01 | ALOSETRON HYDROCHLORIDE                   |  |      | -4.5 | N    | N | N | 1   |     | -7  |
| NCGC00167530-01 | ARBEKACIN SULFATE                         |  |      | -4.5 | -4.5 | N | N | N   | -2  |     |
| NCGC00167531-01 | RIVASTIGMINE TARTRATE                     |  |      | -4.5 | N    | N | N | -5  |     | -2  |
| NCGC00167534-01 | PAZUFLOXACIN                              |  |      |      | N    | N | N | 4   | 0   | -9  |
| NCGC00167537-01 | DONEPEZIL HYDROCHLORIDE                   |  |      | -4.5 | N    | N | N | -8  |     | -14 |
| NCGC00167539-01 | INDOLUM                                   |  |      |      | N    | N | N | -4  | 4   | 7   |
| NCGC00167540-01 | SKATOLUM                                  |  |      | -4.5 | N    | N | N | -3  |     | -5  |
| NCGC00167541-01 | EPIDIHYDROCHOLESTERIN                     |  |      | -4.5 | -4.5 | N | N | N   | -4  |     |
| NCGC00167544-01 | BISOCTRIZOLE                              |  |      |      | N    | N | N | 2   | 1   | 5   |
| NCGC00167546-02 | ADEMETHIONINE                             |  |      |      | N    | N | N | 3   | 7   | -1  |
| NCGC00167549-01 | N-CARBAMYL-L-GLUTAMIC ACID                |  |      |      | N    | N | N | -3  | 10  | 8   |
| NCGC00167552-01 | PIPEROCAINE HYDROCHLORIDE                 |  |      |      | N    | N | N | 5   | 4   | -3  |
| NCGC00167556-01 | CARUMONAM SODIUM                          |  |      |      | N    | N | N | -2  | -3  | -2  |
| NCGC00167559-01 | 5A-ANDROSTA-16-ENE-3-ONE                  |  |      |      | -4.5 | N | N | N   | -1  | -1  |
| NCGC00167560-01 | 3,4-DIAMINOPYRIDINE PHOSPHATE             |  |      |      | -4.5 | N | N | N   | 8   | 13  |
| NCGC00167561-01 | TOCOPHERYL SUCCINATE                      |  | -4.5 |      | N    | N | N |     | 5   | -6  |
| NCGC00167563-01 | MOFEZOLAC                                 |  |      | -4.5 | -4.5 | N | N | N   | 0   |     |
| NCGC00167565-01 | CARBAZOCHROME SODIUM SULFONATE            |  |      |      | -4.5 | N | N | N   | 8   | 15  |
| NCGC00167573-01 | FLAVIN ADENINE DINUCLEOTIDE               |  |      | -4.5 | -4.5 | N | N | N   | 4   |     |
| NCGC00167581-01 | CEFTAZIDIME SODIUM                        |  |      |      | N    | N | N | 4   | -1  | 3   |
| NCGC00167583-01 | 1,3-PROPANEDISULFONIC ACID, DISODIUM SALT |  |      |      | -4.5 | N | N | N   | 6   | 5   |
| NCGC00167588-02 | GOSERELIN ACETATE                         |  |      |      | -4.5 | N | N | N   | 5   | 9   |
| NCGC00167729-01 | LINTITRIPTUM                              |  |      |      | N    | N | N | 3   | 6   | 9   |
| NCGC00167744-01 | MELPERONUM                                |  |      | -4.5 | -4.5 | N | N | N   | 9   |     |
| NCGC00167808-01 | FANANSERINUM                              |  |      |      | N    | N | N | 2   | 4   | 5   |
| NCGC00167838-01 | CILASTATIN SODIUM                         |  | -4.5 |      | N    | N | N |     | 6   | 0   |
| NCGC00167840-01 | LOXORIBINUM                               |  |      | -4.5 | N    | N | N | 3   |     | -3  |

|                 |                                      |      |      |      |   |   |   |     |     |     |
|-----------------|--------------------------------------|------|------|------|---|---|---|-----|-----|-----|
| NCGC00167973-01 | EPERISONE HYDROCHLORIDE              | -4.5 |      |      | N | N | N |     | 6   | 0   |
| NCGC00167980-01 | PRANOPROFEN                          | -4.5 |      |      | N | N | N |     | 10  | 9   |
| NCGC00167983-01 | DESONIDE                             |      | -4.5 | -4.5 | N | N | N | -13 |     |     |
| NCGC00168249-01 | CLOBAZAM                             |      |      | -4.5 | N | N | N | 9   | 13  |     |
| NCGC00168250-01 | ESTAZOLAM                            |      | -4.5 | -4.5 | N | N | N | 9   |     |     |
| NCGC00168251-01 | ETHYLMORPHINE HYDROCHLORIDE          |      |      |      | N | N | N | -13 | -32 | -38 |
| NCGC00168252-01 | FENTANYL                             |      | -4.5 | -4.5 | N | N | N | 6   |     |     |
| NCGC00168253-01 | DIAMORPHINE HYDROCHLORIDE            |      |      |      | N | N | N | 8   | 6   | 8   |
| NCGC00168255-01 | NALORPHINE HYDROCHLORIDE             |      |      | -4.5 | N | N | N | 4   | 5   |     |
| NCGC00168258-01 | TRIAZOLAM                            |      | -4.5 | -4.5 | N | N | N | -4  |     |     |
| NCGC00168345-01 | ETRYPTAMINUM                         |      |      | -4.5 | N | N | N | 5   | 15  |     |
| NCGC00168346-01 | FENAMOLUM                            |      |      |      | N | N | N | 4   | 2   | 9   |
| NCGC00168347-01 | BETAPRODINUM                         |      | -4.5 | -4.5 | N | N | N | 6   |     |     |
| NCGC00168348-01 | ISBUFYLLINUM                         |      | -4.5 |      | N | N | N | -8  |     | 1   |
| NCGC00168349-01 | IODOPHTHALEINUM NATRICUM             |      |      |      | N | N | N | -9  | -6  | -2  |
| NCGC00168746-01 | METILDIGOXIN                         |      |      |      | N | N | N | -5  | 6   | 2   |
| NCGC00168747-01 | METHOXYFLURANE                       |      |      | -4.5 | N | N | N | 1   | 2   |     |
| NCGC00168749-01 | DIFLUPREDNATE                        |      |      |      | N | N | N | -14 | -16 | -28 |
| NCGC00168778-01 | SOLIFENACIN SUCCINATE                |      |      |      | N | N | N | -11 | -2  | -14 |
| NCGC00168779-01 | VALGANCICLOVIR HYDROCHLORIDE         |      |      |      | N | N | N | 2   | 12  | 9   |
| NCGC00168780-01 | MILNACIPRAN                          |      | -4.5 |      | N | N | N |     | 12  | 14  |
| NCGC00168781-01 | TADALAFIL                            |      | -4.5 | -4.5 | N | N | N | 5   |     |     |
| NCGC00168783-01 | ISOFLUOROPHATE                       |      |      | -4.5 | N | N | N | -4  |     | 5   |
| NCGC00168785-01 | DICLAZURIL                           |      | -4.5 |      | N | N | N |     | -4  | -9  |
| NCGC00168787-01 | NORELGESTROMIN                       |      |      |      | N | N | N | -17 | -23 | -22 |
| NCGC00169077-02 | POTASSIUM RICINOLEATE                |      | -4.5 | -4.5 | N | N | N | 3   |     |     |
| NCGC00180996-01 | PROPYL SALICYLATE                    |      | -4.5 |      | N | N | N | -4  |     | 2   |
| NCGC00181001-01 | LAURIC DIETHANOLAMIDE                |      |      |      | N | N | N | 7   | 18  | 16  |
| NCGC00181005-01 | SOMATOSTATIN                         |      | -4.5 |      | N | N | N |     | 0   | 6   |
| NCGC00181006-01 | P-HYDROXYEPHEDRINE HYDROCHLORIDE     |      | -4.5 |      | N | N | N |     | -1  | 8   |
| NCGC00181007-01 | CEFOSELIS SULFATE                    |      |      | -4.5 | N | N | N | 3   |     | 4   |
| NCGC00181008-01 | OLSALAZINE SODIUM                    |      | -4.5 | -4.5 | N | N | N | 0   |     |     |
| NCGC00181012-01 | CEFOZOPRAN HYDROCHLORIDE             |      | -4.5 | -4.5 | N | N | N | 8   |     |     |
| NCGC00181016-01 | BEXAROTENE                           |      |      |      | N | N | N | -12 | -1  | -5  |
| NCGC00181018-01 | ANECORTAVE ACETATE                   |      | -4.5 |      | N | N | N | 5   |     | 2   |
| NCGC00181025-01 | TRANSFLUTHRIN                        |      | -4.5 |      | N | N | N |     | 8   | 17  |
| NCGC00181027-01 | 5-METHYLTETRAHYDROFOLATE SODIUM SALT |      |      |      | N | N | N | 12  | 11  | 11  |
| NCGC00181028-01 | PANTETHINE                           |      |      | -4.5 | N | N | N | 6   | 11  |     |
| NCGC00181029-01 | DIMYRISTOYL LECITHIN                 |      | -4.5 |      | N | N | N |     | 8   | 11  |
| NCGC00181030-01 | URACIL                               |      |      | -4.5 | N | N | N | 6   |     | 7   |
| NCGC00181031-01 | HYDROXYCITRONELLAL                   |      |      |      | N | N | N | 2   | 4   | -1  |
| NCGC00181036-01 | FENIPENTOL                           |      | -4.5 |      | N | N | N |     | 13  | 8   |
| NCGC00181038-01 | LACTALFATUM                          |      |      | -4.5 | N | N | N | 2   | 2   |     |
| NCGC00181039-01 | ETHYL LINOLEATE                      |      |      |      | N | N | N | 4   | 12  | 3   |
| NCGC00181040-01 | CONIINE                              |      | -4.5 |      | N | N | N | 5   |     | 1   |
| NCGC00181041-01 | METHYLCHLOROISOTHIAZOLINONE          |      |      |      | N | N | N | 4   | 8   | 3   |
| NCGC00181042-01 | MENTHYL SALICYLATE                   |      |      | -4.5 | N | N | N | -1  | -1  |     |
| NCGC00181044-01 | SELENOMETHIONINE, L-                 |      | -4.5 |      | N | N | N | 5   |     | 6   |
| NCGC00181049-01 | URIC ACID                            |      |      |      | N | N | N | 8   | 1   | 11  |
| NCGC00181083-01 | PIPETHANATE HYDROCHLORIDE            |      | -4.5 |      | N | N | N | 4   |     | 5   |
| NCGC00181084-01 | LEFETAMINE HYDROCHLORIDE             |      | -4.5 | -4.5 | N | N | N | 1   |     |     |
| NCGC00181092-01 | IPODATE CALCIUM                      |      |      | -4.5 | N | N | N | 5   | 13  |     |
| NCGC00181094-01 | TYROPANOATE SODIUM                   |      | -4.5 |      | N | N | N | 5   |     | 5   |
| NCGC00181095-01 | IPRONIDAZOLE                         |      | -4.5 |      | N | N | N | 3   |     | 10  |
| NCGC00181110-01 | CAMBENDAZOLE                         |      | -4.5 |      | N | N | N | 1   |     | -11 |
| NCGC00181115-01 | 18ALPHA-GLYCYRRHETINIC ACID          |      |      |      | N | N | N | 2   | 5   | 0   |
| NCGC00181117-01 | VIRGINIAMYCIN                        |      |      |      | N | N | N | -1  | -7  | -11 |
| NCGC00181130-01 | ELETRIPTAN HYDROBROMIDE              |      | -4.5 |      | N | N | N | -15 |     | -12 |
| NCGC00181133-01 | DESMOPRESSIN ACETATE                 |      | -4.5 |      | N | N | N |     | 9   | -3  |
| NCGC00181136-01 | PYRROLNITRIN                         |      |      | -4.5 | N | N | N | 7   | -3  |     |
| NCGC00181137-01 | SULFATOLAMIDE                        |      |      |      | N | N | N | 11  | 18  | 0   |
| NCGC00181141-01 | SODIUM SANTONINATE                   |      | -4.5 | -4.5 | N | N | N | -1  |     |     |
| NCGC00181149-01 | PHENYLPROPANOLAMINE MALEATE          |      |      |      | N | N | N | 0   | 1   | 4   |
| NCGC00181151-01 | METOCURINE IODIDE                    |      | -4.5 | -4.5 | N | N | N | 0   |     |     |



|                 |                                                   |      |      |      |   |   |   |     |     |     |
|-----------------|---------------------------------------------------|------|------|------|---|---|---|-----|-----|-----|
| NCGC00181152-01 | NEDAPLATIN                                        |      |      |      | N | N | N | -7  | 11  | 0   |
| NCGC00181156-01 | OXABOLONE CIPIONATE                               |      | -4.5 |      | N | N | N | 2   | 5   |     |
| NCGC00181160-01 | ECABET SODIUM                                     | -4.5 |      |      | N | N | N | 0   |     | 0   |
| NCGC00181161-01 | ETHYL SALICYLATE                                  |      | -4.5 |      | N | N | N | 2   | 9   |     |
| NCGC00181164-01 | ISOLEUCINE                                        | -4.5 | -4.5 |      | N | N | N | -4  |     |     |
| NCGC00181165-02 | DECANOHYDROXAMIC ACID                             |      |      |      | N | N | N | 4   | 9   | 7   |
| NCGC00181166-01 | MESNA                                             |      | -4.5 |      | N | N | N | -1  | 8   |     |
| NCGC00181169-01 | PENTISOMICINUM                                    |      |      |      | N | N | N | 1   | 6   | 6   |
| NCGC00181170-01 | BENDAMUSTINUM                                     | -4.5 |      |      | N | N | N | 6   |     | 1   |
| NCGC00181290-01 | FURAZABOL                                         |      |      |      | N | N | N | 2   | -9  | -21 |
| NCGC00181294-01 | THIAMINE DISULFIDE                                |      |      |      | N | N | N | -4  | 10  | -1  |
| NCGC00181296-01 | SERATRODAST                                       |      |      |      | N | N | N | -10 | -22 | -27 |
| NCGC00181297-01 | MEBROFENIN                                        | -4.5 |      |      | N | N | N |     | -5  | -26 |
| NCGC00181305-01 | MAGNESIUM SALICYLATE                              |      | -4.5 | -4.5 | N | N | N | 7   |     |     |
| NCGC00181307-01 | FEBANTEL                                          |      |      |      | N | N | N | 7   | 10  | 6   |
| NCGC00181308-01 | SORBITAN MONOPALMITATE                            |      |      | -4.5 | N | N | N | 0   | -20 |     |
| NCGC00181318-01 | HYDROXOCOBALAMIN ACETATE                          | -4.5 | -4.5 |      | N | N | N | 4   |     |     |
| NCGC00181320-01 | MERSALYL SODIUM                                   |      |      |      | N | N | N | 3   | -6  | 1   |
| NCGC00181327-01 | 25-Hydroxycholesterol                             |      |      | -4.5 | N | N | N | -2  | 2   |     |
| NCGC00181332-01 | 3b-(2-Diethylaminoethoxy)androst-5-en-17-one, HCl | -4.5 |      |      | N | N | N | -12 |     | -8  |
| NCGC00181334-01 | DIBUNATE SODIUM                                   |      | -4.5 |      | N | N | N | 7   | 3   |     |
| NCGC00181335-01 | DIETHYLSTILBESTROL DIPHOSPHATE                    |      | -4.5 |      | N | N | N | 11  | 10  |     |
| NCGC00181336-01 | FLUDARABINE PHOSPHATE                             |      | -4.5 |      | N | N | N | 1   | 2   |     |
| NCGC00181338-01 | Triiodothyronine, reverse                         | -4.5 | -4.5 |      | N | N | N | -3  |     |     |
| NCGC00181339-01 | CEFPIROME SULPHATE                                |      |      |      | N | N | N | -10 | -5  | -15 |
| NCGC00181342-01 | IMIDAPRIL HYDROCHLORIDE                           | -4.5 |      |      | N | N | N | 2   |     | 8   |
| NCGC00181345-01 | TEMOCAPRIL HYDROCHLORIDE                          | -4.5 |      |      | N | N | N | -14 |     | -11 |
| NCGC00181346-01 | CILASTATIN SODIUM                                 |      |      |      | N | N | N | 11  | -6  | 3   |
| NCGC00181347-01 | ACIPIMOX                                          | -4.5 | -4.5 |      | N | N | N | -3  |     |     |
| NCGC00181348-01 | TEICOPLANIN                                       |      |      |      | N | N | N | -1  | 11  | -1  |
| NCGC00181349-01 | STRONTIUM RANELATE                                |      |      |      | N | N | N | 8   | 4   | 6   |
| NCGC00181353-01 | NORGESTIMATE                                      |      |      |      | N | N | N | -16 | -21 | -17 |
| NCGC00181354-01 | TOCORETINATE                                      | -4.5 |      |      | N | N | N |     | 12  | 1   |
| NTOC00000202-01 |                                                   |      | -4.5 |      | N | N | N | 7   | -3  |     |
| NCGC00013103-01 | GLYCINE                                           |      | -4.5 |      | N | N | N | 4   | 4   |     |
| NCGC00013287-06 | CARZENIDUM                                        | -4.5 | -4.5 |      | N | N | N | 8   |     |     |
| NCGC00013556-01 | Detrothyronin                                     |      |      |      | N | N | N | -20 | -24 | -32 |
| NCGC00014044-01 | Dimetacrine                                       |      |      |      | N | N | N | -34 | -32 | -31 |
| NCGC00014529-01 | mesoridazine                                      | -4.5 |      |      | N | N | N |     | -14 | -8  |
| NCGC00014684-03 | PIFEXOLUM                                         | -4.5 | -4.5 |      | N | N | N | 8   |     |     |
| NCGC00015012-02 | ALAPROCLATE                                       | -4.5 | -4.5 |      | N | N | N | 6   |     |     |
| NCGC00015060-06 | Azathioprine                                      |      |      |      | N | N | N | -22 | -12 | -23 |
| NCGC00015074-10 | Acetazolamide                                     |      |      | -4.5 | N | N | N | 2   | 7   |     |
| NCGC00015155-03 | BEPRIDIL                                          | -4.5 | -4.5 |      | N | N | N | -29 |     |     |
| NCGC00015216-11 | Chlorpropamide                                    | -4.5 |      |      | N | N | N |     | 14  | 6   |
| NCGC00015226-07 | Mitotane                                          |      |      |      | N | N | N | -27 | -23 | -30 |
| NCGC00015279-02 | Meclofenoxate hydrochloride                       |      |      |      | N | N | N | 15  | 27  | 17  |
| NCGC00015426-04 | FURAFYLLINE                                       |      | -4.5 |      | N | N | N | 5   | 1   |     |
| NCGC00015506-03 | HYDROXYTACRINE                                    |      | -4.5 |      | N | N | N | 2   | 5   |     |
| NCGC00015560-06 | IDAZOXAN                                          |      |      |      | N | N | N | -14 | -12 | -25 |
| NCGC00015609-03 | Lonidamine                                        | -4.5 | -4.5 |      | N | N | N | -6  |     |     |
| NCGC00015610-02 | Lefunomide                                        |      | -4.5 |      | N | N | N | 0   | 3   |     |
| NCGC00015760-06 | DL-OCTOPAMINE                                     | -4.5 |      |      | N | N | N |     | -4  | -6  |
| NCGC00015762-06 | OXOLINIC ACID                                     |      |      |      | N | N | N | -20 | -9  | -20 |
| NCGC00015793-03 | Palmitoylethanolamide                             |      |      |      | N | N | N | 10  | 12  | 8   |
| NCGC00015821-02 | Piracetam                                         |      | -4.5 |      | N | N | N | 7   | 1   |     |
| NCGC00015829-02 | Promazine hydrochloride                           |      |      |      | N | N | N | -16 | -4  | -20 |
| NCGC00015830-02 | Phenelzine sulfate                                |      |      |      | N | N | N | -12 | -17 | -31 |
| NCGC00015882-09 | RILUZOLE                                          |      | -4.5 |      | N | N | N | 1   | 6   |     |
| NCGC00015908-05 | SPIROXATRINE                                      | -4.5 | -4.5 |      | N | N | N | -13 |     |     |
| NCGC00015958-03 | SP 600125                                         | -4.5 | -4.5 |      | N | N | N | -9  |     |     |
| NCGC00015985-03 | Tracazolate hydrochloride                         |      |      |      | N | N | N | 6   | -16 | -13 |
| NCGC00016049-02 | Tetracaine hydrochloride                          |      |      |      | N | N | N | 22  | 28  | 23  |
| NCGC00016098-07 | XYLAZINE                                          |      |      |      | N | N | N | -31 | -12 | -25 |

|                 |                               |  |  |      |      |      |   |   |     |     |      |
|-----------------|-------------------------------|--|--|------|------|------|---|---|-----|-----|------|
| NCGC00016105-03 | Zaprinast                     |  |  |      | -4.5 | N    | N | N | -22 | -19 |      |
| NCGC00016119-02 | Bretylium tosylate            |  |  |      |      | N    | N | N | -19 | -11 | -31  |
| NCGC00016224-02 | NIACINAMIDE                   |  |  | -4.5 | -4.5 | N    | N | N | -8  |     |      |
| NCGC00016226-01 | Pralidoxime chloride          |  |  |      | -4.5 | N    | N | N | 0   | 3   |      |
| NCGC00016233-01 | Lynestrenol                   |  |  | -4.5 |      | N    | N | N |     | 3   | 10   |
| NCGC00016258-02 | MENADIONE                     |  |  |      |      | N    | N | N | -21 | -29 | -28  |
| NCGC00016270-04 | L-3,4-DIHYDROXYPHENYL-ALANINE |  |  |      | -4.5 | N    | N | N | 8   | 9   |      |
| NCGC00016274-04 | Phenazone                     |  |  |      | -4.5 | N    | N | N | 11  | 19  |      |
| NCGC00016308-01 | Isopropamide iodide           |  |  | -4.5 |      | N    | N | N |     | -2  | -23  |
| NCGC00016338-01 | Dibucaine                     |  |  | -4.5 |      | N    | N | N |     | 3   | -16  |
| NCGC00016339-01 | Phensuximide                  |  |  |      | -4.5 | -4.5 | N | N | -7  |     |      |
| NCGC00016353-03 | BUTAMBEN                      |  |  |      |      | N    | N | N | 12  | 14  | 13   |
| NCGC00016360-01 | Monobenzene                   |  |  |      |      | N    | N | N | -28 | -27 | -27  |
| NCGC00016366-01 | Azacyclonol                   |  |  | -4.5 |      | N    | N | N |     | 9   | 0    |
| NCGC00016431-01 | Triflusal                     |  |  | -4.5 |      | N    | N | N |     | 15  | 10   |
| NCGC00016433-01 | Isoflupredone acetate         |  |  | -4.5 |      | N    | N | N |     | 0   | 5    |
| NCGC00016438-01 | Procabazine hydrochloride     |  |  |      | -4.5 | -4.5 | N | N | -10 |     |      |
| NCGC00016492-01 | Methocarbamol                 |  |  |      |      | -4.5 | N | N | -4  | -3  |      |
| NCGC00016494-01 | Amyleine hydrochloride        |  |  |      | -4.5 | -4.5 | N | N | 2   |     |      |
| NCGC00016513-01 | Debrisoquin sulfate           |  |  |      |      | -4.5 | N | N | 3   | 7   |      |
| NCGC00016534-01 | Cyclopenthiiazide             |  |  | -4.5 |      | N    | N | N |     | 1   | 3    |
| NCGC00016551-01 | Meprylcaine hydrochloride     |  |  |      |      | N    | N | N | -3  | 6   | 7    |
| NCGC00016557-01 | Ethaverine hydrochloride      |  |  |      |      | N    | N | N | -20 | -13 | -30  |
| NCGC00016572-01 | Sulfamonomethoxine            |  |  | -4.5 |      | N    | N | N |     | 0   | 16   |
| NCGC00016587-01 | Metixene hydrochloride        |  |  |      |      | N    | N | N | -31 | -22 | -31  |
| NCGC00016616-01 | Medrysone                     |  |  | -4.5 |      | N    | N | N |     | -8  | -19  |
| NCGC00016617-01 | Mebeverine hydrochloride      |  |  |      |      | N    | N | N | -21 | -26 | -32  |
| NCGC00016638-01 | Furaltadone hydrochloride     |  |  |      |      | N    | N | N | -30 | -30 | -28  |
| NCGC00016639-01 | Ifosfamide                    |  |  | -4.5 |      | N    | N | N |     | 6   | -1   |
| NCGC00016653-01 | (cis-) Nanophine              |  |  | -4.5 |      | N    | N | N |     | 11  | 12   |
| NCGC00016654-01 | Flurbiprofen                  |  |  |      |      | N    | N | N | -27 | -12 | -24  |
| NCGC00016661-01 | Cyclopentolate hydrochloride  |  |  |      |      | N    | N | N | 16  | 31  | 22   |
| NCGC00016676-01 | Proglumide                    |  |  |      | -4.5 |      | N | N | 2   | 5   |      |
| NCGC00016755-01 | Oxamniquine                   |  |  | -4.5 |      | N    | N | N |     | -4  | 1    |
| NCGC00016769-01 | Famprofazone                  |  |  |      |      | N    | N | N | -5  | -10 | -16  |
| NCGC00016805-01 | Metrizamide                   |  |  | -4.5 |      | N    | N | N |     | 13  | 9    |
| NCGC00016810-01 | Labetalol hydrochloride       |  |  |      |      | N    | N | N | -7  | -11 | -16  |
| NCGC00016823-01 | Pivampicillin                 |  |  |      | -4.5 |      | N | N | 1   | 5   |      |
| NCGC00016831-01 | Buflomedil hydrochloride      |  |  | -4.5 |      | N    | N | N |     | 0   | 5    |
| NCGC00016877-01 | Praziquantel                  |  |  | -4.5 |      | N    | N | N |     | 10  | 10   |
| NCGC00016906-01 | Dipivefrin hydrochloride      |  |  |      | -4.5 |      | N | N | -6  | -20 |      |
| NCGC00016912-01 | Terconazole                   |  |  |      |      | N    | N | N | -10 | 4   | -20  |
| NCGC00016924-02 | SULMAZOLE                     |  |  |      | -4.5 |      | N | N | 9   | 9   |      |
| NCGC00016927-01 | Enoxacin                      |  |  |      |      | N    | N | N | -12 | -1  | -3   |
| NCGC00016978-01 | Repaglinide                   |  |  | -4.5 |      | N    | N | N |     | 11  | 8    |
| NCGC00017045-01 | Trimeprazine tartrate         |  |  |      |      | N    | N | N | -8  | -2  | -1   |
| NCGC00017096-01 | Morantel tartrate             |  |  |      |      | N    | N | N | -13 | -5  | -12  |
| NCGC00017135-01 | Ketorolac tromethamine        |  |  |      | -4.5 |      | N | N | 0   | -7  |      |
| NCGC00018122-08 | LY 171883                     |  |  |      |      | N    | N | N | -13 | -15 | -20  |
| NCGC00018211-03 | FLUMEQUINE                    |  |  |      | -4.5 |      | N | N | -8  | -5  |      |
| NCGC00018221-06 | CINCHOPHENUM                  |  |  |      | -4.5 | -4.5 | N | N | 9   |     |      |
| NCGC00018238-04 | OXIBENDAZOLE                  |  |  | -4.5 |      | N    | N | N |     | -2  | -5   |
| NCGC00024667-04 | Methyldopa sesquihydrate      |  |  |      |      | N    | N | N | -9  | -8  | -9   |
| NCGC00025303-03 | S(-)-RACLOPRIDE               |  |  | -4.5 |      | N    | N | N |     | 1   | 5    |
| NCGC00025325-02 | VAPIPROST HYDROCHLORIDE       |  |  |      | -4.5 |      | N | N | -11 |     | -14  |
| NCGC00025335-01 | Reboxetine mesylate           |  |  |      |      | N    | N | N | -16 | -29 | -21  |
| NCGC00025357-01 | Nicorandil                    |  |  |      |      | N    | N | N | 14  | 21  | 24   |
| NCGC00026844-02 | ACIDUM NIXYLICUM              |  |  |      | -4.5 | -4.5 | N | N | 10  |     |      |
| NCGC00037064-02 | Zearalanol                    |  |  | -4.5 |      | N    | N | N |     | -13 | -22  |
| NCGC00063341-02 | GIPARMENUM                    |  |  |      |      | N    | N | N | 9.5 | 16  | 11.5 |
| NCGC00075916-01 | ETEROBARBUM                   |  |  |      | -4.5 |      | N | N | 5   | 2   |      |
| NCGC00090793-02 | Naphthalene                   |  |  |      |      | N    | N | N | 7   | 8   | 11   |
| NCGC00090797-03 | Digoxin                       |  |  | -4.5 |      | N    | N | N |     | -25 | -19  |
| NCGC00090892-01 | Urea                          |  |  | -4.5 |      | N    | N | N |     | 15  | 15   |

|                 |                                                         |      |      |      |   |   |   |     |     |     |
|-----------------|---------------------------------------------------------|------|------|------|---|---|---|-----|-----|-----|
| NCGC00091057-01 | Silibinin                                               |      |      |      | N | N | N | -15 | -15 | -17 |
| NCGC00091104-02 | Aspartame                                               |      |      |      | N | N | N | 15  | 31  | 21  |
| NCGC00091238-02 | 2-MERCAPTOBENZOTHAZOLE                                  | -4.5 |      |      | N | N | N |     | 8   | 11  |
| NCGC00091423-02 | METACETAMOL                                             |      | -4.5 | -4.5 | N | N | N | 10  |     |     |
| NCGC00091572-01 | Mercuric chloride                                       |      |      |      | N | N | N | -32 | -34 | -36 |
| NCGC00093372-02 | D-TRYPTOPHAN                                            |      |      | -4.5 | N | N | N | 10  | 15  |     |
| NCGC00093792-01 | L-3,4-Dihydroxyphenylalanine methyl ester hydrochloride |      |      |      | N | N | N | -19 | -14 | -21 |
| NCGC00094087-01 | Mizoribine                                              |      |      |      | N | N | N | 7   | 15  | 9   |
| NCGC00094091-01 | NG-Monomethyl-L-arginine acetate                        | -4.5 |      |      | N | N | N |     | -2  | 6   |
| NCGC00094280-01 | Quazinone                                               |      |      |      | N | N | N | -14 | -2  | -1  |
| NCGC00094363-03 | D-SERINE                                                |      |      | -4.5 | N | N | N | 7   | 0   |     |
| NCGC00094412-02 | TULOButEROL                                             |      |      |      | N | N | N | -17 | -17 | -17 |
| NCGC00094439-01 | Tetraethylammonium chloride                             |      |      |      | N | N | N | -9  | 2   | 7   |
| NCGC00094507-01 | Olprinone hydrochloride                                 |      | -4.5 | -4.5 | N | N | N | -8  |     |     |
| NCGC00094779-01 | SALICYL ALCOHOL                                         | -4.5 |      |      | N | N | N |     | 10  | 10  |
| NCGC00094917-01 | ACETAMINOSALOL                                          | -4.5 |      |      | N | N | N |     | 5   | 7   |
| NCGC00094995-01 | ADIPHENINE HYDROCHLORIDE                                |      | -4.5 | -4.5 | N | N | N | -9  |     |     |
| NCGC00095024-01 | FIPEXIDE HYDROCHLORIDE                                  |      |      |      | N | N | N | -17 | -15 | -32 |
| NCGC00095043-01 | TETROQUINONE                                            |      |      |      | N | N | N | -11 | -14 | -18 |
| NCGC00095111-01 | AMINOLEVULINIC ACID HYDROCHLORIDE                       | -4.5 |      |      | N | N | N |     | -22 | -14 |
| NCGC00095130-01 | MOXIFLOXACIN HYDROCHLORIDE                              |      |      |      | N | N | N | -19 | -19 | -26 |
| NCGC00095148-01 | CANRENONE                                               |      | -4.5 |      | N | N | N | -11 |     | -11 |
| NCGC00095191-01 | OSELTAMIVIR TARTRATE                                    |      |      |      | N | N | N | -14 | -15 | -16 |
| NCGC00095403-01 | TOMATIDINE HYDROCHLORIDE                                |      |      |      | N | N | N | -11 | -24 | -30 |
| NCGC00095782-01 | N-METHYL (-)EPHEDRINE                                   |      |      | -4.5 | N | N | N | 4   | 1   |     |
| NCGC00096009-01 | CLAVULANATE LITHIUM                                     |      |      | -4.5 | N | N | N | 0   | -4  |     |
| NCGC00096040-01 | BLEOMYCIN (bleomycin B2 shown)                          | -4.5 |      |      | N | N | N |     | 3   | 1   |
| NCGC00159363-02 | ETHISTERONUM                                            |      |      | -4.5 | N | N | N | 8   | 6   |     |
| NCGC00159374-02 | CHLORAL HYDRATE                                         |      | -4.5 | -4.5 | N | N | N | 1   |     |     |
| NCGC00159389-02 | THIOACETAZONUM                                          |      |      |      | N | N | N | 9   | 7   | 16  |
| NCGC00159478-02 | Benzoxiquine                                            |      | -4.5 | -4.5 | N | N | N | -16 |     |     |
| NCGC00159520-02 | Valacyclovir hydrochloride                              | -4.5 |      |      | N | N | N |     | 1   | 10  |
| NCGC00159553-01 | FANAPANELUM                                             |      | -4.5 | -4.5 | N | N | N | 10  |     |     |
| NCGC00160359-01 | Cefaloram                                               |      | -4.5 | -4.5 | N | N | N | 0   |     |     |
| NCGC00160387-01 | Clothiapine                                             |      |      |      | N | N | N | -21 | -25 | -30 |
| NCGC00160396-01 | Pravadoline maleate                                     |      |      |      | N | N | N | 9   | 8   | 12  |
| NCGC00160412-01 | Indocate                                                |      |      |      | N | N | N | 14  | 17  | 16  |
| NCGC00160416-01 | Chlormidazole                                           |      |      |      | N | N | N | -15 | -9  | -12 |
| NCGC00160434-01 | Esaprazola                                              |      |      | -4.5 | N | N | N | 1   | 8   |     |
| NCGC00160461-01 | Quindoxin                                               |      |      | -4.5 | N | N | N | 6   | 11  |     |
| NCGC00160479-01 | Ftorpropazine                                           | -4.5 |      |      | N | N | N |     | -22 | -21 |
| NCGC00160498-01 | Clostebol                                               |      |      |      | N | N | N | -12 | -8  | -23 |
| NCGC00160499-01 | DICARBINUM                                              | -4.5 |      |      | N | N | N |     | -3  | -4  |
| NCGC00160534-01 | Flurogestone acetate                                    |      |      | -4.5 | N | N | N | 4   | 4   |     |
| NCGC00160556-01 | Rafoxanide                                              |      |      |      | N | N | N | -10 | 0   | -15 |
| NCGC00160559-01 | TOLAMOLOLUM                                             |      | -4.5 | -4.5 | N | N | N | 5   |     |     |
| NCGC00160573-01 | Menbutone                                               | -4.5 |      |      | N | N | N |     | 9   | 7   |
| NCGC00160575-01 | URACIL MUSTARD                                          |      |      | -4.5 | N | N | N | 8   | 13  |     |
| NCGC00160577-01 | LAURIXAMINUM                                            |      |      |      | N | N | N | -21 | -8  | -8  |
| NCGC00160587-01 | Dixanthogen                                             |      | -4.5 |      | N | N | N | 4   |     | 7   |
| NCGC00160653-02 | GLYSOBUZOLUM                                            | -4.5 |      |      | N | N | N |     | 1   | 10  |
| NCGC00160657-01 | Frentizole                                              |      |      |      | N | N | N | -9  | -15 | -23 |
| NCGC00160665-01 | Proroxanum                                              |      | -4.5 | -4.5 | N | N | N | 6   |     |     |
| NCGC00160671-01 | VIOMYCIN SULFATE                                        | -4.5 |      |      | N | N | N |     | 10  | 8   |
| NCGC00160674-01 | Aconiazida                                              | -4.5 |      |      | N | N | N |     | 5   | 5   |
| NCGC00160677-01 | Butinolina                                              |      |      |      | N | N | N | -6  | -11 | -17 |
| NCGC00160680-01 | NOREXIMIDUM                                             |      |      | -4.5 | N | N | N | 0   | 10  |     |
| NCGC00161328-03 | SECALCIFEROL                                            |      |      |      | N | N | N | -13 | -15 | -25 |
| NCGC00161336-02 | POTASSIUM RICINOLEATE                                   | -4.5 |      |      | N | N | N |     | 10  | 9   |
| NCGC00162222-01 | Cibenzoline succinate                                   |      |      |      | N | N | N | -14 | -13 | -26 |
| NCGC00162275-02 | NALBUPHINE                                              | -4.5 |      |      | N | N | N |     | 11  | 9   |
| NCGC00163240-01 | NEOSTIGMINE                                             |      |      |      | N | N | N | -18 | -12 | -15 |
| NCGC00163318-01 | SURAMIN                                                 |      |      |      | N | N | N | -18 | -3  | -17 |
| NCGC00163344-01 | O-PHOSPHO-L-SERINE                                      | -4.5 | -4.5 |      | N | N | N | 7   |     |     |

|                 |                                        |      |      |      |   |   |   |     |     |     |
|-----------------|----------------------------------------|------|------|------|---|---|---|-----|-----|-----|
| NCGC00163355-01 | INDIGO                                 |      |      |      | N | N | N | -26 | -21 | -19 |
| NCGC00164511-01 | Menadiol                               |      |      |      | N | N | N | -18 | -15 | -25 |
| NCGC00164518-01 | SULFONETHYLMETHANE                     |      | -4.5 | -4.5 | N | N | N | 8   |     |     |
| NCGC00164522-01 | METISAZONUM                            |      |      |      | N | N | N | -20 | -29 | -28 |
| NCGC00164542-01 | TALINOLOLUM                            |      |      |      | N | N | N | -17 | -22 | -34 |
| NCGC00164583-01 | Amdinocillin                           |      | -4.5 |      | N | N | N |     | -13 | -18 |
| NCGC00164592-01 | ARGATROBAN                             |      |      | -4.5 | N | N | N | 1   |     |     |
| NCGC00164621-01 | FENPIVERINII BROMIDUM                  |      |      |      | N | N | N | -14 | -5  | -15 |
| NCGC00164622-01 | Voriconazole                           |      |      | -4.5 | N | N | N | 2   | -1  |     |
| NCGC00164636-01 | TRIPTORELIN PAMOATE                    |      |      | -4.5 | N | N | N | 8   | -1  |     |
| NCGC00165769-02 | CLORICROMENUM                          |      |      | -4.5 | N | N | N | 0   | -1  |     |
| NCGC00166026-01 | Nikethamide                            |      |      | -4.5 | N | N | N | 1   | 7   |     |
| NCGC00166087-01 | TIMONACICUM                            |      | -4.5 |      | N | N | N |     | 3   | 8   |
| NCGC00166140-01 | PYRITHIOXINE                           |      | -4.5 |      | N | N | N |     | 9   | 9   |
| NCGC00166216-01 | AMYL CINNAMAL                          |      |      | -4.5 | N | N | N | 0   | 11  |     |
| NCGC00166242-01 | SWEET SPIRITS OF NITRE                 |      |      |      | N | N | N | -13 | 9   | -10 |
| NCGC00166266-02 | CARMUSTINE                             |      |      | -4.5 | N | N | N | 11  |     |     |
| NCGC00166304-01 | Captamina                              |      | -4.5 |      | N | N | N |     | 12  | 12  |
| NCGC00167428-01 | IBANDRONATE SODIUM                     |      |      | -4.5 | N | N | N | 5   | 6   |     |
| NCGC00167472-01 | AMLEXANOX                              |      |      |      | N | N | N | -17 | -25 | -36 |
| NCGC00167487-01 | BICALUTAMIDE                           |      |      | -4.5 | N | N | N |     | -7  | -12 |
| NCGC00167514-01 | ETHYLESTRENOL                          |      |      | -4.5 | N | N | N |     | 11  | 8   |
| NCGC00167524-01 | AMOROLFINE HYDROCHLORIDE               |      |      | -4.5 | N | N | N | 7   | 2   |     |
| NCGC00167533-01 | VARDENAFIL HYDROCHLORIDE               |      |      |      | N | N | N | -16 | -18 | -24 |
| NCGC00167554-01 | TRYPAN BLUE                            |      |      |      | N | N | N | -27 | -19 | -25 |
| NCGC00167571-01 | DEXAMETHASONE METASULFOBENZOATE SODIUM |      |      |      | N | N | N | 13  | 8   | 8   |
| NCGC00167725-01 | TIANEPTINUM                            |      | -4.5 | -4.5 | N | N | N | 4   |     |     |
| NCGC00168254-01 | MIDAZOLAM HYDROCHLORIDE                |      |      |      | N | N | N | 2   | 0   | -2  |
| NCGC00168256-01 | PRAZEPAM                               |      |      |      | N | N | N | -9  | -25 | -19 |
| NCGC00168352-01 | TETRAMETHRINUM                         |      |      | -4.5 | N | N | N | 15  | 10  |     |
| NCGC00168353-01 | FENOBAMUM                              |      |      | -4.5 | N | N | N | 3   | 1   |     |
| NCGC00168774-01 | RASAGILINE MESYLATE                    |      |      | -4.5 | N | N | N | 11  | 11  |     |
| NCGC00168775-01 | DARIFENACIN HYDROBROMIDE               |      |      |      | N | N | N | -22 | -33 | -32 |
| NCGC00168776-01 | DELAVIDRINE MESYLATE                   |      |      |      | N | N | N | -14 | -9  | -18 |
| NCGC00180998-01 | AMYLMETACRESOL                         |      |      | -4.5 | N | N | N |     | 4   | 5   |
| NCGC00181011-01 | GIMERACIL                              |      |      | -4.5 | N | N | N | 10  | 15  |     |
| NCGC00181021-01 | BUFOGENIN                              |      |      | -4.5 | N | N | N | 9   |     |     |
| NCGC00181037-01 | ISOFLURANE                             |      |      | -4.5 | N | N | N | -11 | 3   |     |
| NCGC00181046-01 | RASBURICASE                            |      |      |      | N | N | N | 0   | 16  | 3   |
| NCGC00181050-01 | PENTASTARCH                            |      |      | -4.5 | N | N | N | 6   |     |     |
| NCGC00181081-01 | FLUDROCORTISONE ACETATE                |      |      | -4.5 | N | N | N | 9   | -2  |     |
| NCGC00181096-01 | CHLOPHEDIANOL HYDROCHLORIDE            |      |      | -4.5 | N | N | N |     | -6  | -14 |
| NCGC00181097-01 | DIMEFLINE HYDROCHLORIDE                |      |      |      | N | N | N | 9   | -1  |     |
| NCGC00181107-01 | AROTINOLOL HYDROCHLORIDE               |      |      |      | N | N | N | -14 | -13 | -30 |
| NCGC00181108-01 | CELIPROLOL HYDROCHLORIDE               |      |      | -4.5 | N | N | N | 6   |     |     |
| NCGC00181126-01 | ARFORMOTEROL TARTRATE                  |      |      |      | N | N | N | -28 | -8  | -22 |
| NCGC00181135-01 | PENTAMYCIN                             |      |      | -4.5 | N | N | N | 5   | 6   |     |
| NCGC00181153-01 | TREOSULFAN                             |      |      | -4.5 | N | N | N | -7  |     |     |
| NCGC00181343-01 | IVABRADINE HYDROCHLORIDE               |      |      |      | N | N | N | -21 | -21 | -34 |
| NCGC00181350-01 | VATALANIBUM                            |      |      |      | N | N | N | -12 | -15 | -17 |
| NCGC00181355-01 | CARPRONIUM CHLORIDE                    |      |      | -4.5 | N | N | N |     | 8   | 9   |
| NCGC00013095-01 | GERANIOL                               | 0.00 |      | -4.5 | N | N | N |     | 9   |     |
| NCGC00013109-01 | Fenolipuna                             | 0.00 |      | -4.5 | N | N | N |     | -1  |     |
| NCGC00013319-01 | ouabain                                | 0.00 |      | -4.5 | N | N | N |     | -6  |     |
| NCGC00014702-03 | WY 14643                               | 0.00 |      | -4.5 | N | N | N |     | 2   |     |
| NCGC00015014-05 | Acetohexamide                          | 0.00 |      | -4.5 | N | N | N |     | -1  |     |
| NCGC00015121-08 | Fenoxibenzamina                        | 0.00 |      | -4.5 | N | N | N |     | 6   |     |
| NCGC00015156-11 | BACLOFEN                               | 0.00 |      | -4.5 | N | N | N |     | 6   |     |
| NCGC00015257-08 | Clofibrate                             | 0.00 |      | -4.5 | N | N | N |     | 8   |     |
| NCGC00015462-07 | GLIPIZIDE                              | 0.00 |      | -4.5 | N | N | N |     | 13  |     |
| NCGC00015479-09 | Genistein                              | 0.00 |      | -4.5 | N | N | N |     | -5  |     |
| NCGC00015508-08 | HYDROCHLOROTHIAZIDE                    | 0.00 |      | -4.5 | N | N | N |     | 7   |     |
| NCGC00015673-08 | MINOXIDIL                              | 0.00 |      | -4.5 | N | N | N |     | 4   |     |
| NCGC00015680-11 | MELATONIN                              | 0.00 |      | -4.5 | N | N | N |     | 17  |     |

|                 |                                 |      |      |      |   |   |   |     |
|-----------------|---------------------------------|------|------|------|---|---|---|-----|
| NCGC00015715-04 | NISOXETINE                      | 0.00 | -4.5 | -4.5 | N | N | N | 0   |
| NCGC00015859-07 | PROCAINAMIDE                    | 0.00 | -4.5 | -4.5 | N | N | N | 11  |
| NCGC00015925-02 | Sulfaphenazole                  | 0.00 | -4.5 | -4.5 | N | N | N | 5   |
| NCGC00016011-08 | 4-HYDROXYPHENETHYLAMINE         | 0.00 | -4.5 | -4.5 | N | N | N | -3  |
| NCGC00016032-06 | alpha-Lipoic acid               | 0.00 | -4.5 | -4.5 | N | N | N | 5   |
| NCGC00016035-02 | Trazodone hydrochloride         | 0.00 | -4.5 | -4.5 | N | N | N | 1   |
| NCGC00016069-09 | UK 14,304                       | 0.00 | -4.5 | -4.5 | N | N | N | 5   |
| NCGC00016149-03 | FUREGRELATE SODIUM              | 0.00 | -4.5 | -4.5 | N | N | N | 8   |
| NCGC00016242-01 | Metyrapone                      | 0.00 | -4.5 | -4.5 | N | N | N | 0   |
| NCGC00016268-02 | NIACIN                          | 0.00 | -4.5 | -4.5 | N | N | N | 2   |
| NCGC00016272-01 | Guanethidine sulfate            | 0.00 | -4.5 | -4.5 | N | N | N | -1  |
| NCGC00016288-01 | Bemegride                       | 0.00 | -4.5 | -4.5 | N | N | N | 0   |
| NCGC00016306-01 | D-cycloserine                   | 0.00 | -4.5 | -4.5 | N | N | N | 0   |
| NCGC00016312-01 | Bendroflumethiazide             | 0.00 | -4.5 | -4.5 | N | N | N | 10  |
| NCGC00016327-01 | Khellin                         | 0.00 | -4.5 | -4.5 | N | N | N | 1   |
| NCGC00016330-01 | Methylprednisolone, 6-alpha     | 0.00 | -4.5 | -4.5 | N | N | N | -12 |
| NCGC00016335-01 | Dienestrol                      | 0.00 | -4.5 | -4.5 | N | N | N | 4   |
| NCGC00016348-02 | Ethoxyquin                      | 0.00 | -4.5 | -4.5 | N | N | N | -12 |
| NCGC00016350-01 | Guaiifenesin                    | 0.00 | -4.5 | -4.5 | N | N | N | 2   |
| NCGC00016386-01 | Sulfamerazine                   | 0.00 | -4.5 | -4.5 | N | N | N | 10  |
| NCGC00016390-01 | Piperidolate hydrochloride      | 0.00 | -4.5 | -4.5 | N | N | N | -11 |
| NCGC00016401-01 | Hydroflumethiazide              | 0.00 | -4.5 | -4.5 | N | N | N | 4   |
| NCGC00016410-06 | Thiabendazole                   | 0.00 | -4.5 | -4.5 | N | N | N | -4  |
| NCGC00016411-01 | Butacaine                       | 0.00 | -4.5 | -4.5 | N | N | N | 1   |
| NCGC00016462-01 | Crotamiton                      | 0.00 | -4.5 | -4.5 | N | N | N | 4   |
| NCGC00016485-01 | Tetrahydrozoline hydrochloride  | 0.00 | -4.5 | -4.5 | N | N | N | 0   |
| NCGC00016519-01 | Thiocolchicoside                | 0.00 | -4.5 | -4.5 | N | N | N | 7   |
| NCGC00016558-01 | Lymecycline                     | 0.00 | -4.5 | -4.5 | N | N | N | 11  |
| NCGC00016566-01 | Dexamethasone acetate           | 0.00 | -4.5 | -4.5 | N | N | N | 4   |
| NCGC00016585-01 | Procyclidine hydrochloride      | 0.00 | -4.5 | -4.5 | N | N | N | 5   |
| NCGC00016613-01 | Antazoline hydrochloride        | 0.00 | -4.5 | -4.5 | N | N | N | -6  |
| NCGC00016614-01 | Methyldopate hydrochloride      | 0.00 | -4.5 | -4.5 | N | N | N | 4   |
| NCGC00016634-01 | Acetopromazine maleate salt     | 0.00 | -4.5 | -4.5 | N | N | N | -4  |
| NCGC00016660-01 | Felbinac                        | 0.00 | -4.5 | -4.5 | N | N | N | 11  |
| NCGC00016666-01 | Hydrocotarnine hydrobromide     | 0.00 | -4.5 | -4.5 | N | N | N | 2   |
| NCGC00016667-01 | Benoxinate hydrochloride        | 0.00 | -4.5 | -4.5 | N | N | N | 8   |
| NCGC00016717-01 | Molindone hydrochloride         | 0.00 | -4.5 | -4.5 | N | N | N | 5   |
| NCGC00016737-01 | Epirizole                       | 0.00 | -4.5 | -4.5 | N | N | N | 0   |
| NCGC00016784-01 | Articaine hydrochloride         | 0.00 | -4.5 | -4.5 | N | N | N | 3   |
| NCGC00016845-01 | Talampicillin hydrochloride     | 0.00 | -4.5 | -4.5 | N | N | N | 4   |
| NCGC00016846-01 | Suprofen                        | 0.00 | -4.5 | -4.5 | N | N | N | 12  |
| NCGC00016879-01 | Torseamide                      | 0.00 | -4.5 | -4.5 | N | N | N | -2  |
| NCGC00016893-01 | Clorsulon                       | 0.00 | -4.5 | -4.5 | N | N | N | 1   |
| NCGC00016936-01 | Aztreonam                       | 0.00 | -4.5 | -4.5 | N | N | N | 10  |
| NCGC00016954-05 | (-)-QUINPIROLE                  | 0.00 | -4.5 | -4.5 | N | N | N | 6   |
| NCGC00016981-01 | Troleandomycin                  | 0.00 | -4.5 | -4.5 | N | N | N | -1  |
| NCGC00016983-01 | Flunisolide                     | 0.00 | -4.5 | -4.5 | N | N | N | 5   |
| NCGC00016995-01 | Betazole hydrochloride          | 0.00 | -4.5 | -4.5 | N | N | N | -7  |
| NCGC00017033-01 | Novobiocin sodium salt          | 0.00 | -4.5 | -4.5 | N | N | N | -1  |
| NCGC00017047-01 | Alverine citrate salt           | 0.00 | -4.5 | -4.5 | N | N | N | 3   |
| NCGC00017049-01 | Dipyron                         | 0.00 | -4.5 | -4.5 | N | N | N | 12  |
| NCGC00017082-02 | DICLOFENAC SODIUM               | 0.00 | -4.5 | -4.5 | N | N | N | 3   |
| NCGC00017256-04 | GALANTHAMINE                    | 0.00 | -4.5 | -4.5 | N | N | N | 3   |
| NCGC00017332-05 | (1S,9R)-beta-HYDRASTINE         | 0.00 | -4.5 | -4.5 | N | N | N | -1  |
| NCGC00018230-03 | DROPROPIZINE                    | 0.00 | -4.5 | -4.5 | N | N | N | 9   |
| NCGC00021139-03 | PHENYTOIN                       | 0.00 | -4.5 | -4.5 | N | N | N | -4  |
| NCGC00021144-02 | BUCLADESINE                     | 0.00 | -4.5 | -4.5 | N | N | N | 1   |
| NCGC00022304-05 | N-acetylcysteine                | 0.00 | -4.5 | -4.5 | N | N | N | 3   |
| NCGC00024257-04 | Fenilefrina                     | 0.00 | -4.5 | -4.5 | N | N | N | 10  |
| NCGC00024493-02 | D-ALANINE                       | 0.00 | -4.5 | -4.5 | N | N | N | 11  |
| NCGC00024596-05 | CARBIDOPA                       | 0.00 | -4.5 | -4.5 | N | N | N | -1  |
| NCGC00024613-01 | Alrestatin                      | 0.00 | -4.5 | -4.5 | N | N | N | 18  |
| NCGC00042523-02 | MORPHOLINYLMERCAPTOBENZOTHAZOLE | 0.00 | -4.5 | -4.5 | N | N | N | 1   |
| NCGC00065934-02 | OXCARBAZEPINE                   | 0.00 | -4.5 | -4.5 | N | N | N | 6   |

|                 |                                    |      |      |      |   |   |   |    |
|-----------------|------------------------------------|------|------|------|---|---|---|----|
| NCGC00090680-01 | Carbaryl                           | 0.00 | -4.5 | -4.5 | N | N | N | -7 |
| NCGC00090802-01 | beta-Propiolactone                 | 0.00 | -4.5 | -4.5 | N | N | N | 0  |
| NCGC00090955-03 | Dicyclohexylamine                  | 0.00 | -4.5 | -4.5 | N | N | N | 8  |
| NCGC00091020-03 | Sodium dodecyl sulfate             | 0.00 | -4.5 | -4.5 | N | N | N | 5  |
| NCGC00091038-01 | Deoxycholic acid sodium salt       | 0.00 | -4.5 | -4.5 | N | N | N | 5  |
| NCGC00091062-04 | 5-HYDROXY-L-TRYPTOPHAN             | 0.00 | -4.5 | -4.5 | N | N | N | 4  |
| NCGC00091172-01 | Methanol                           | 0.00 | -4.5 | -4.5 | N | N | N | 8  |
| NCGC00091208-04 | 4-Hexylresorcinol                  | 0.00 | -4.5 | -4.5 | N | N | N | 8  |
| NCGC00091219-02 | DIETHYLTOLUAMIDE                   | 0.00 | -4.5 | -4.5 | N | N | N | 6  |
| NCGC00091225-02 | HALAZONE                           | 0.00 | -4.5 | -4.5 | N | N | N | 1  |
| NCGC00091527-01 | Ethylenediamine                    | 0.00 | -4.5 | -4.5 | N | N | N | 9  |
| NCGC00091766-01 | Ethyl acetate                      | 0.00 | -4.5 | -4.5 | N | N | N | 10 |
| NCGC00091921-01 | Ammonium nitrate                   | 0.00 | -4.5 | -4.5 | N | N | N | 13 |
| NCGC00093701-01 | Citicoline sodium                  | 0.00 | -4.5 | -4.5 | N | N | N | 1  |
| NCGC00094144-03 | Metyrosine                         | 0.00 | -4.5 | -4.5 | N | N | N | 7  |
| NCGC00094540-01 | PARADICHLOROBENZENE                | 0.00 | -4.5 | -4.5 | N | N | N | -8 |
| NCGC00094557-01 | AKLONIDE                           | 0.00 | -4.5 | -4.5 | N | N | N | -8 |
| NCGC00094586-01 | AMOXICILLIN                        | 0.00 | -4.5 | -4.5 | N | N | N | 5  |
| NCGC00094646-01 | DIBENZOTHIOPHENE                   | 0.00 | -4.5 | -4.5 | N | N | N | 6  |
| NCGC00094811-01 | ZOMEPIRAC SODIUM                   | 0.00 | -4.5 | -4.5 | N | N | N | 1  |
| NCGC00094856-01 | ADENINE                            | 0.00 | -4.5 | -4.5 | N | N | N | 8  |
| NCGC00094902-01 | MINAPRINE HYDROCHLORIDE            | 0.00 | -4.5 | -4.5 | N | N | N | 1  |
| NCGC00094952-01 | CEFOPERAZONE SODIUM                | 0.00 | -4.5 | -4.5 | N | N | N | 4  |
| NCGC00094983-01 | BETAINE HYDROCHLORIDE              | 0.00 | -4.5 | -4.5 | N | N | N | 12 |
| NCGC00095015-01 | CITIOLONE                          | 0.00 | -4.5 | -4.5 | N | N | N | 5  |
| NCGC00095021-01 | HEPTAMINOL HYDROCHLORIDE           | 0.00 | -4.5 | -4.5 | N | N | N | 1  |
| NCGC00095037-01 | HYDROCORTISONE BUTYRATE            | 0.00 | -4.5 | -4.5 | N | N | N | 1  |
| NCGC00095041-01 | URETHANE                           | 0.00 | -4.5 | -4.5 | N | N | N | 5  |
| NCGC00095045-01 | SULFANITRAN                        | 0.00 | -4.5 | -4.5 | N | N | N | 2  |
| NCGC00095089-01 | FLUCONAZOLE                        | 0.00 | -4.5 | -4.5 | N | N | N | 14 |
| NCGC00095124-01 | ROSIGLITAZONE                      | 0.00 | -4.5 | -4.5 | N | N | N | 0  |
| NCGC00095140-01 | SIBUTRAMINE HYDROCHLORIDE          | 0.00 | -4.5 | -4.5 | N | N | N | 11 |
| NCGC00095161-01 | REBAMIPIDE                         | 0.00 | -4.5 | -4.5 | N | N | N | 9  |
| NCGC00095181-01 | TOPIRAMATE                         | 0.00 | -4.5 | -4.5 | N | N | N | 8  |
| NCGC00095227-01 | ALIZARIN                           | 0.00 | -4.5 | -4.5 | N | N | N | 3  |
| NCGC00095271-01 | ALOIN                              | 0.00 | -4.5 | -4.5 | N | N | N | 9  |
| NCGC00095599-01 | ARBUTIN                            | 0.00 | -4.5 | -4.5 | N | N | N | 11 |
| NCGC00095933-01 | FENAMISAL                          | 0.00 | -4.5 | -4.5 | N | N | N | 1  |
| NCGC00096014-01 | SALSALATE                          | 0.00 | -4.5 | -4.5 | N | N | N | 4  |
| NCGC00142580-03 | PYRIDOXAL HYDROCHLORIDE            | 0.00 | -4.5 | -4.5 | N | N | N | 0  |
| NCGC00159343-02 | Tramadolol                         | 0.00 | -4.5 | -4.5 | N | N | N | -1 |
| NCGC00159350-02 | TYROSINE                           | 0.00 | -4.5 | -4.5 | N | N | N | 5  |
| NCGC00159367-03 | PARALDEHYDE                        | 0.00 | -4.5 | -4.5 | N | N | N | 16 |
| NCGC00159370-02 | DOCOSANOL                          | 0.00 | -4.5 | -4.5 | N | N | N | 4  |
| NCGC00159377-02 | 4-T-BUTYLPHENOL FORMALDEHYDE RESIN | 0.00 | -4.5 | -4.5 | N | N | N | -2 |
| NCGC00159380-02 | Benzoyl peroxide                   | 0.00 | -4.5 | -4.5 | N | N | N | 5  |
| NCGC00159394-02 | NICOFURANOSUM                      | 0.00 | -4.5 | -4.5 | N | N | N | 4  |
| NCGC00159395-03 | Fenicarbazida                      | 0.00 | -4.5 | -4.5 | N | N | N | 13 |
| NCGC00159430-03 | HEXOBARBITAL                       | 0.00 | -4.5 | -4.5 | N | N | N | 1  |
| NCGC00159449-03 | TIFENAMILUM                        | 0.00 | -4.5 | -4.5 | N | N | N | 1  |
| NCGC00159463-02 | Phenacaine hydrochloride           | 0.00 | -4.5 | -4.5 | N | N | N | 2  |
| NCGC00159465-02 | Cefazolin                          | 0.00 | -4.5 | -4.5 | N | N | N | 3  |
| NCGC00159484-02 | CHLORALOSUM                        | 0.00 | -4.5 | -4.5 | N | N | N | 9  |
| NCGC00159495-03 | ALBUTOINUM                         | 0.00 | -4.5 | -4.5 | N | N | N | 6  |
| NCGC00159507-02 | Alclofenac                         | 0.00 | -4.5 | -4.5 | N | N | N | 2  |
| NCGC00159512-02 | Cefdinir                           | 0.00 | -4.5 | -4.5 | N | N | N | 1  |
| NCGC00159514-02 | Didanosine                         | 0.00 | -4.5 | -4.5 | N | N | N | 3  |
| NCGC00159521-02 | Zoledronic acid                    | 0.00 | -4.5 | -4.5 | N | N | N | 12 |
| NCGC00159559-02 | Eplerenone                         | 0.00 | -4.5 | -4.5 | N | N | N | 5  |
| NCGC00160239-01 | THEBAINE                           | 0.00 | -4.5 | -4.5 | N | N | N | 10 |
| NCGC00160357-01 | SORBITANI LAURAS                   | 0.00 | -4.5 | -4.5 | N | N | N | 8  |
| NCGC00160385-01 | Dinoprost tromethamine             | 0.00 | -4.5 | -4.5 | N | N | N | 4  |
| NCGC00160419-01 | Clofenoxide                        | 0.00 | -4.5 | -4.5 | N | N | N | -1 |
| NCGC00160437-01 | Etebenecid                         | 0.00 | -4.5 | -4.5 | N | N | N | 11 |

|                 |                                                   |      |      |      |   |   |   |    |
|-----------------|---------------------------------------------------|------|------|------|---|---|---|----|
| NCGC00160470-01 | LEUCIGLUMERUM                                     | 0.00 | -4.5 | -4.5 | N | N | N | 10 |
| NCGC00160482-01 | Sulfalene                                         | 0.00 | -4.5 | -4.5 | N | N | N | -2 |
| NCGC00160494-01 | Nicaraven                                         | 0.00 | -4.5 | -4.5 | N | N | N | 3  |
| NCGC00160497-01 | Benzoclidina                                      | 0.00 | -4.5 | -4.5 | N | N | N | -5 |
| NCGC00160588-02 | ANOXOMER                                          | 0.00 | -4.5 | -4.5 | N | N | N | 2  |
| NCGC00160594-02 | IPROHEPTINE HYDROCHLORIDE                         | 0.00 | -4.5 | -4.5 | N | N | N | 6  |
| NCGC00160614-01 | GLUCURONAMIDE                                     | 0.00 | -4.5 | -4.5 | N | N | N | 6  |
| NCGC00160667-01 | Sulfaethidole                                     | 0.00 | -4.5 | -4.5 | N | N | N | 9  |
| NCGC00163230-01 | CHLORISONDAMINE                                   | 0.00 | -4.5 | -4.5 | N | N | N | 16 |
| NCGC00163333-01 | D-GLUTAMINE                                       | 0.00 | -4.5 | -4.5 | N | N | N | 10 |
| NCGC00163473-01 | OUABAIN                                           | 0.00 | -4.5 | -4.5 | N | N | N | -3 |
| NCGC00164015-01 | 1-Phenyl-3-methyl-5-pyrazolone                    | 0.00 | -4.5 | -4.5 | N | N | N | 0  |
| NCGC00164057-01 | Bronopol                                          | 0.00 | -4.5 | -4.5 | N | N | N | -1 |
| NCGC00164128-01 | Hexadecanoic acid, 1-methylethyl ester            | 0.00 | -4.5 | -4.5 | N | N | N | 7  |
| NCGC00164321-01 | 2-Phenylphenol sodium salt tetrahydrate technical | 0.00 | -4.5 | -4.5 | N | N | N | 3  |
| NCGC00164327-02 | NATRII ETASULFAS                                  | 0.00 | -4.5 | -4.5 | N | N | N | 3  |
| NCGC00164339-02 | EDETOLUM                                          | 0.00 | -4.5 | -4.5 | N | N | N | 0  |
| NCGC00164357-01 | L-Ascorbic acid                                   | 0.00 | -4.5 | -4.5 | N | N | N | 1  |
| NCGC00164402-01 | Beclomethasone                                    | 0.00 | -4.5 | -4.5 | N | N | N | 4  |
| NCGC00164487-01 | CHLORPHENOCTII AMSONAS                            | 0.00 | -4.5 | -4.5 | N | N | N | -2 |
| NCGC00164494-01 | Nithiamide                                        | 0.00 | -4.5 | -4.5 | N | N | N | 1  |
| NCGC00164509-01 | OXFENICINUM                                       | 0.00 | -4.5 | -4.5 | N | N | N | -1 |
| NCGC00164515-01 | SULFONMETHANE                                     | 0.00 | -4.5 | -4.5 | N | N | N | 11 |
| NCGC00164520-01 | THREONINE                                         | 0.00 | -4.5 | -4.5 | N | N | N | 1  |
| NCGC00164531-01 | CYSTINE                                           | 0.00 | -4.5 | -4.5 | N | N | N | 1  |
| NCGC00164584-01 | Cetraxate hydrochloride                           | 0.00 | -4.5 | -4.5 | N | N | N | 0  |
| NCGC00164585-01 | Halometasona                                      | 0.00 | -4.5 | -4.5 | N | N | N | -1 |
| NCGC00164629-01 | Alibendol                                         | 0.00 | -4.5 | -4.5 | N | N | N | 7  |
| NCGC00164630-01 | PENCICLOVIR SODIUM                                | 0.00 | -4.5 | -4.5 | N | N | N | 12 |
| NCGC00164634-01 | BALSALAZIDE DISODIUM                              | 0.00 | -4.5 | -4.5 | N | N | N | 1  |
| NCGC00164737-01 | pirbuterol hydrochloride                          | 0.00 | -4.5 | -4.5 | N | N | N | 11 |
| NCGC00165767-02 | CYCLOFENIL                                        | 0.00 | -4.5 | -4.5 | N | N | N | 0  |
| NCGC00166095-01 | BISMUTH OXIDE                                     | 0.00 | -4.5 | -4.5 | N | N | N | 11 |
| NCGC00166100-01 | CAMPHENE                                          | 0.00 | -4.5 | -4.5 | N | N | N | 4  |
| NCGC00166103-01 | Xylose                                            | 0.00 | -4.5 | -4.5 | N | N | N | -2 |
| NCGC00166111-01 | Epiestriol                                        | 0.00 | -4.5 | -4.5 | N | N | N | 5  |
| NCGC00166146-01 | Quinestrol                                        | 0.00 | -4.5 | -4.5 | N | N | N | 0  |
| NCGC00166149-01 | NITENPYRAM                                        | 0.00 | -4.5 | -4.5 | N | N | N | 2  |
| NCGC00166210-01 | PAROMOMYCIN SULFATE                               | 0.00 | -4.5 | -4.5 | N | N | N | 6  |
| NCGC00166219-01 | Bipenamol hydrochloride                           | 0.00 | -4.5 | -4.5 | N | N | N | 3  |
| NCGC00166238-01 | Benznidazol                                       | 0.00 | -4.5 | -4.5 | N | N | N | 12 |
| NCGC00166260-01 | Bumetrizole                                       | 0.00 | -4.5 | -4.5 | N | N | N | 9  |
| NCGC00166261-01 | 5-Hydroxy-2-adamantanone                          | 0.00 | -4.5 | -4.5 | N | N | N | -1 |
| NCGC00166280-01 | Bismuth Subgallate                                | 0.00 | -4.5 | -4.5 | N | N | N | 2  |
| NCGC00166283-01 | PROTOPORPHYRIN DISODIUM                           | 0.00 | -4.5 | -4.5 | N | N | N | -4 |
| NCGC00166284-01 | Dikegulac                                         | 0.00 | -4.5 | -4.5 | N | N | N | 13 |
| NCGC00167417-01 | BORNEOL                                           | 0.00 | -4.5 | -4.5 | N | N | N | 0  |
| NCGC00167425-01 | DEFERIPRONE                                       | 0.00 | -4.5 | -4.5 | N | N | N | 4  |
| NCGC00167458-01 | CEFONICID SODIUM                                  | 0.00 | -4.5 | -4.5 | N | N | N | 6  |
| NCGC00167460-01 | CEFTIZOXIME SODIUM                                | 0.00 | -4.5 | -4.5 | N | N | N | 12 |
| NCGC00167461-01 | BENDAZAC                                          | 0.00 | -4.5 | -4.5 | N | N | N | 1  |
| NCGC00167529-01 | ITOPRIDE HYDROCHLORIDE                            | 0.00 | -4.5 | -4.5 | N | N | N | 5  |
| NCGC00167553-01 | NORFENEFRINE HYDROCHLORIDE                        | 0.00 | -4.5 | -4.5 | N | N | N | 12 |
| NCGC00167555-01 | SODIUM BUTYRATE                                   | 0.00 | -4.5 | -4.5 | N | N | N | 0  |
| NCGC00167557-01 | METHYLMETHIONINE SULFONIUM CHLORIDE               | 0.00 | -4.5 | -4.5 | N | N | N | 13 |
| NCGC00167800-01 | CARBOPLATIN                                       | 0.00 | -4.5 | -4.5 | N | N | N | 3  |
| NCGC00168247-01 | AMPHETAMINE ADIPATE                               | 0.00 | -4.5 | -4.5 | N | N | N | 0  |
| NCGC00168248-01 | BENZOYLECGONINE                                   | 0.00 | -4.5 | -4.5 | N | N | N | 8  |
| NCGC00168771-01 | FOSAMPRENAVIR CALCIUM                             | 0.00 | -4.5 | -4.5 | N | N | N | 9  |
| NCGC00180997-01 | ETHYLPHENACEMIDE                                  | 0.00 | -4.5 | -4.5 | N | N | N | -4 |
| NCGC00181015-01 | BROPYRIMINE                                       | 0.00 | -4.5 | -4.5 | N | N | N | 10 |
| NCGC00181053-01 | MALIC ACID                                        | 0.00 | -4.5 | -4.5 | N | N | N | 10 |
| NCGC00181118-01 | SULFABROMOMETHAZINE SODIUM                        | 0.00 | -4.5 | -4.5 | N | N | N | 6  |
| NCGC00181155-01 | PIPERAZINE-CARBON DISULFIDE COMPLEX               | 0.00 | -4.5 | -4.5 | N | N | N | 5  |

|                 |                               |      |      |      |   |   |   |     |     |     |
|-----------------|-------------------------------|------|------|------|---|---|---|-----|-----|-----|
| NCGC00181341-01 | EMEDASTINE DIFUMARATE         | 0.00 | -4.5 | -4.5 | N | N | N | 9   |     |     |
| NCGC00095007-01 | CEFTRIAXONE SODIUM TRIHYDRATE |      |      |      | N | N | N | -12 | -21 | -15 |
| NCGC00095120-01 | CARVEDILOL TARTRATE           |      |      |      | N | N | N | -27 | 1   | -24 |
| NCGC00167488-01 | SORAFENIB TOSYLATE            |      |      |      | N | N | N | -6  | -10 | -30 |

Notes for Dataset 1

**DCP**- differential chemical phenotype is a compound showing  $\geq 0.7$  Log IC<sub>50</sub> (IC<sub>50</sub>, 5-fold difference) between the parental 3D7 line and a *pfabcg2* knockout line (B2 or C11). IC<sub>50</sub> is half maximal inhibitory concentration in molar and log transformed. Drugs that are more active in a *pfabcg2* knockout line are indicated as sensitive (Sens) and those less active are indicated as resistant (Resist). **Pink shading**- DCP compounds in both B2 and C11 lines that are not known antifolates. **Blue shading**- DCP antifolates in both B2 and C11 lines. **Delta IC<sub>50</sub>**- difference in Log IC<sub>50</sub> between 3D7 and the indicated *pfabcg2* knockout line. **IC<sub>50</sub>**- Log IC<sub>50</sub> values of compounds showing dose-response curves determined as active (A) or inconclusive (I) with a curve-fit *P*-value  $\leq 0.05$  are shown. Values are not shown for curve-fit *P*-values  $> 0.05$  or for inactive (N) compounds having curve-fits below threshold activity (~30%). Inactive compounds with no curve-fit were assigned a IC<sub>50</sub> of -4.5, the highest tested concentration. Compounds with IC<sub>50</sub>  $< -9.3$  (the lowest tested concentration) or  $> -4.5$  (the highest tested concentration) were assigned -9.3 or -4.5, respectively. **Activity**- Activity classification based on curve fit quality metrics, Active (A)- high quality dose-response curve (Class 1.1, 1.2 and 2.1), Inconclusive (I)- lower quality curve (Class 2.2 and 3) and Inactive (N) (Class 4). See reference 44. **Efficacy**- Maximum percent activity (inhibition) of a compound based on the curve fit of the dose response data. Inactive (N) compounds where no curve fit was generated have no efficacy values and are therefore left blank. Compounds are ranked first by DCP status (columns C and D, then 3D7 activity (column J), then Delta Log IC50 B2 (column E).
